# Supplementary material
Source: PubMed Central journal article supplement (PMC4354199)
Supplement: ncomms6987-s1.pdf [file ncomms6987-s1.pdf]

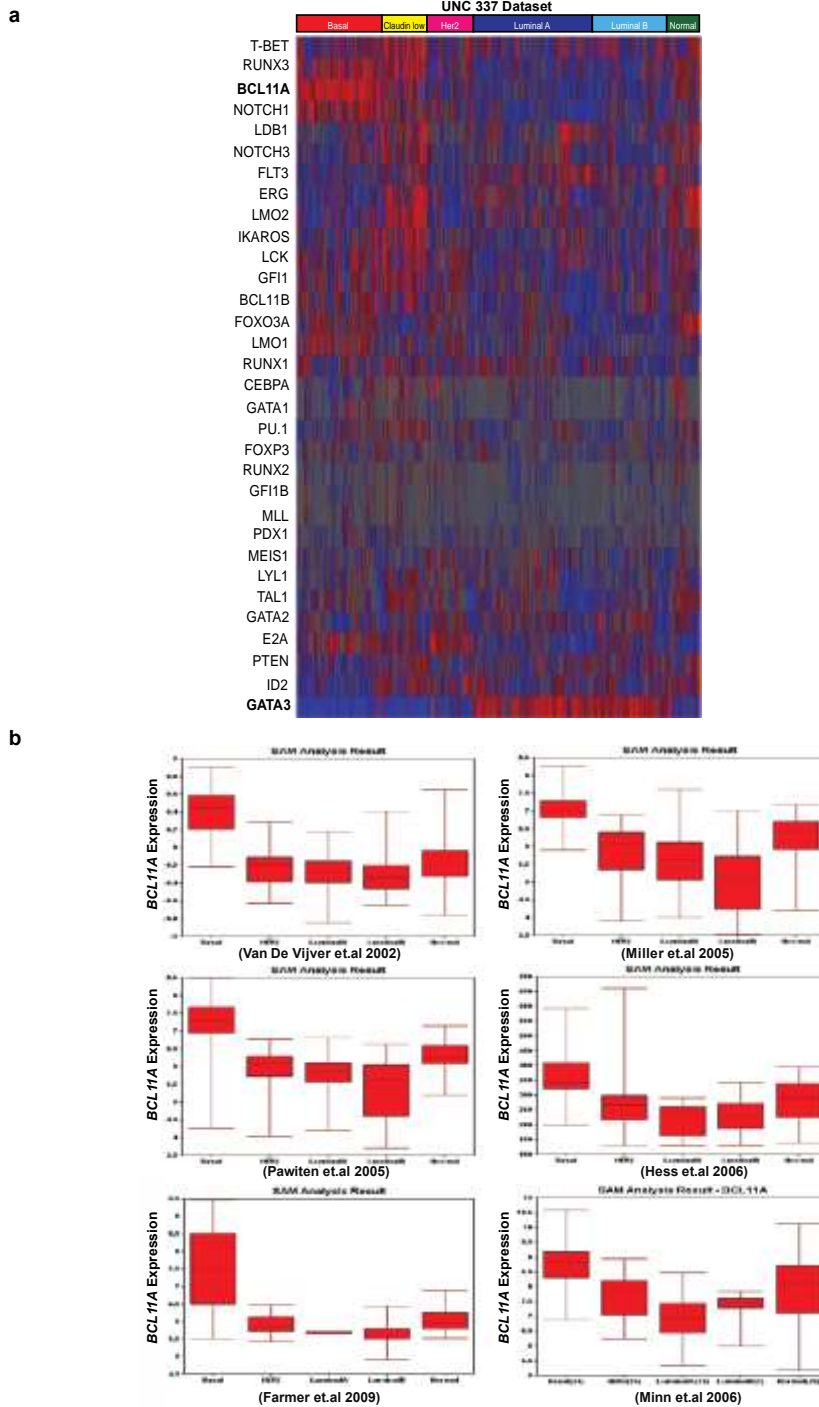

**Supplementary Figure 1. Expression analysis of *BCL11* in various published microarray datasets**

(a) Heatmap showing the expression analysis of a list of selected key hematopoiesis genes in 337 breast cancer patients<sup>6</sup> across different breast cancer molecular subtypes. (b) Analysis of *BCL11A* expression in the six microarray datasets from the ICR ROCK database. Box plots showing high levels of *BCL11A* in the basal subtype of breast cancer. All 6 data sets had *BCL11A* expression called at the basal subgroup and had a q-value less than 0.05.

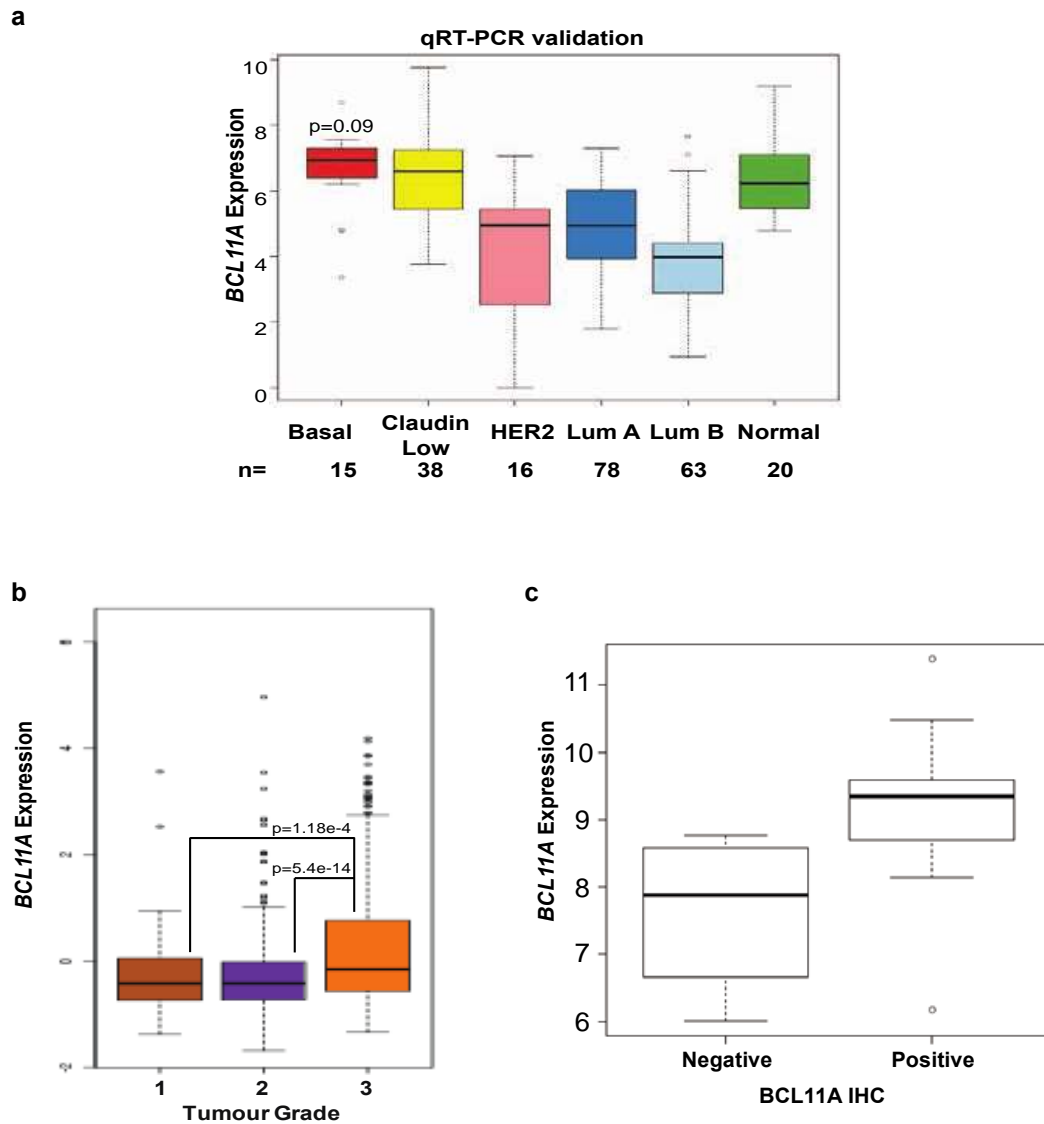

**Supplementary Figure 2. Systematic analysis of *BCL11A* expression in the METABRIC dataset**

(a) qRT-PCR analysis of *BCL11A* in 230 randomly selected patients from the METABRIC dataset. p-value refers to t-test comparing the Basal subtype vs. all other subtypes. (b) Correlation of *BCL11A* expression and the high clinical grades (1, 2, and 3) in patients from the METABRIC study (c) Correlation between *BCL11A* protein staining and the RNA levels. T-test was performed and the p-values are displayed on each panel.

Supplementary Figure 3

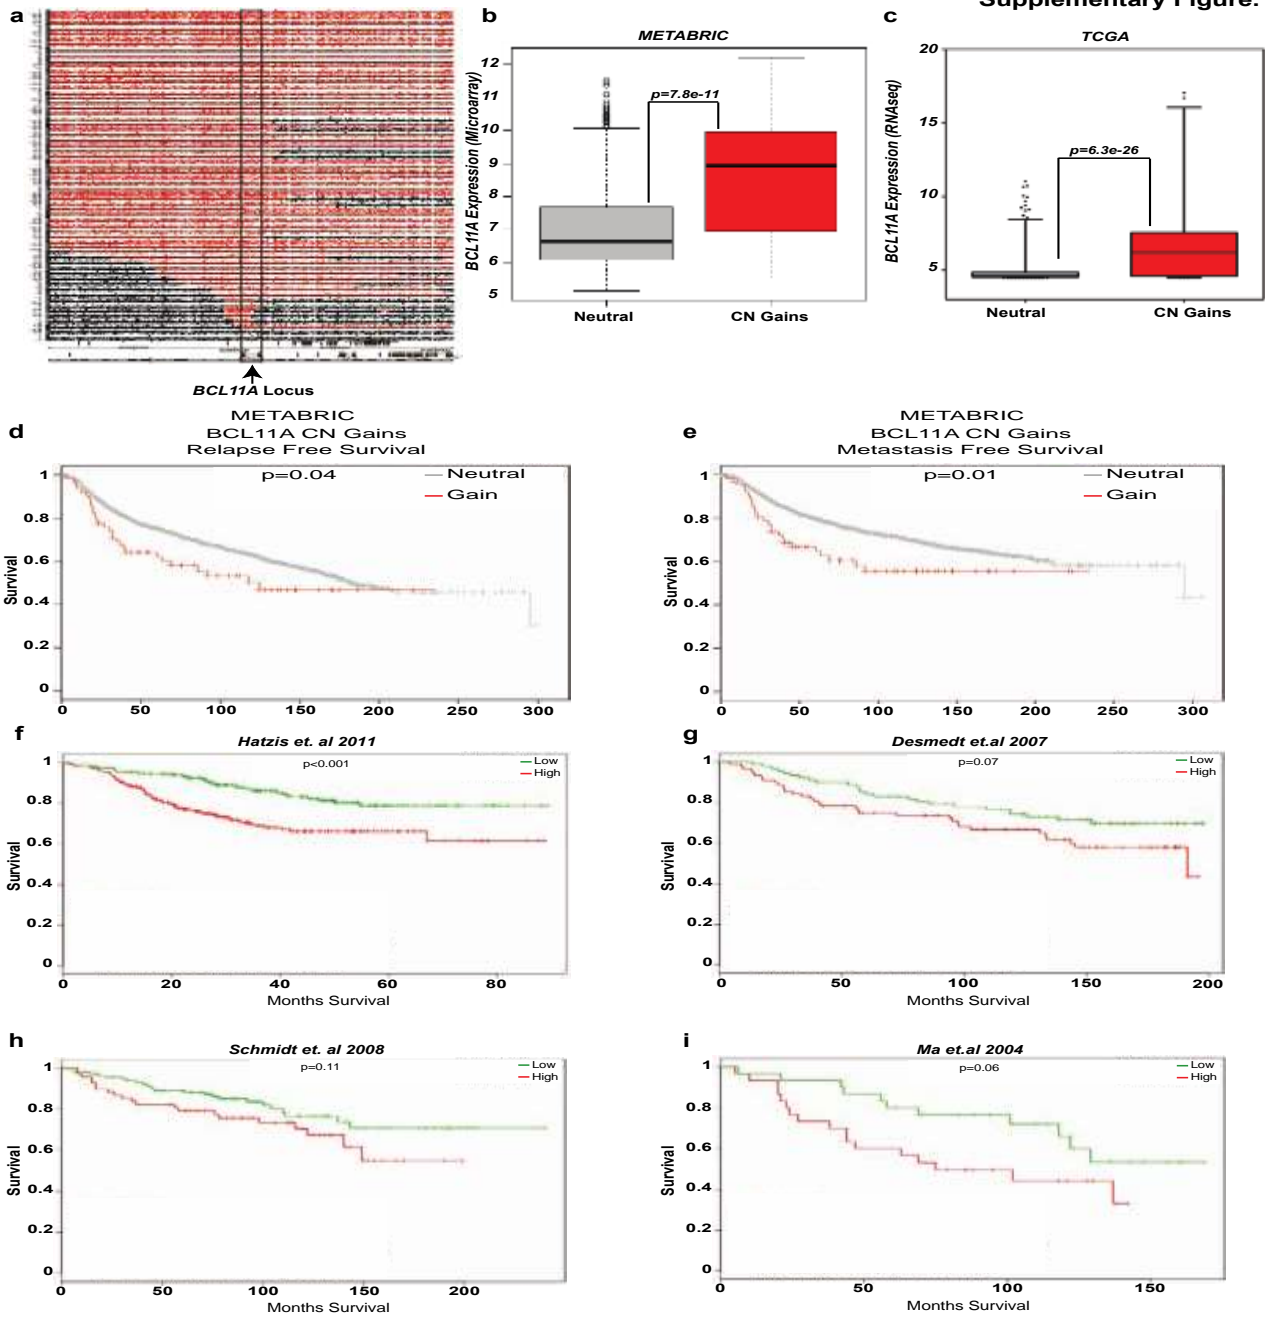

**Supplementary Figure 3. Analysis of *BCL11A* copy number alterations in the METABRIC and TCGA datasets**  
**(a)** Array comparative genomic hybridization (aCGH) plots showing CN gains at the *BCL11A* locus. A minimum region of CN gains can be defined around the *BCL11A* locus. **(b-c)** High *BCL11A* expression in patients with CN gains at the *BCL11A* locus in both the METABRIC and TCGA datasets. T-test was performed and the p-value is displayed on the plots. **(d-e)** Kaplan-Meier plots comparing relapse or metastasis survival rates between patients with *BCL11A* CN gains or those without. **(f-i)** Kaplan-Meier plots depicting the survival of *BCL11A* high vs. low patients in four independent datasets. Data was generated using the ICR ROCK database.

## Supplementary Figure. 4

**a**

PB-TRE-BCL11A

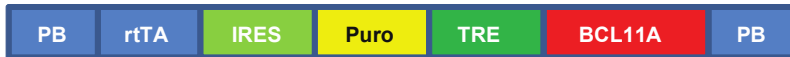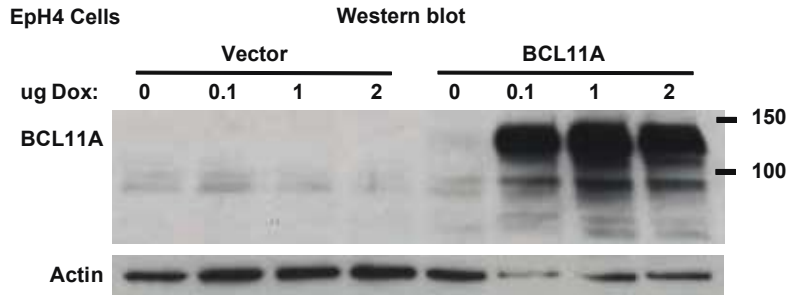

**b**

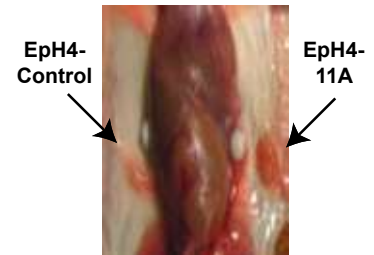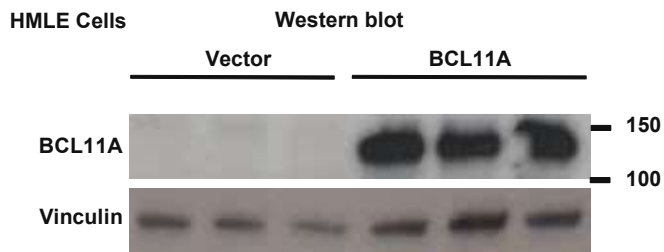

**c**

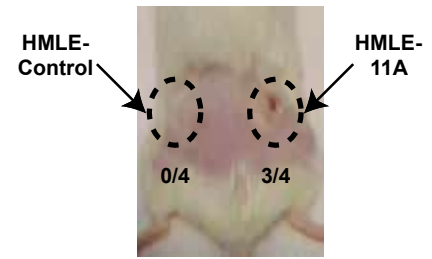

**Supplementary Figure 4. *BCL11A* overexpression promotes colony formation and induces tumour development**  
**(a)** Schematic diagram of the *BCL11A* overexpression vector used in this study. The expression cassette is cloned in a *piggyBac* transposon and is delivered to cells by the *piggybac* (PB) transposition. Western blot shows *BCL11A* transgene expression in EpH4 and HMLE cells. **(b-c)** Images of tumours formed by EpH4-11A and HMLE-11A cells.

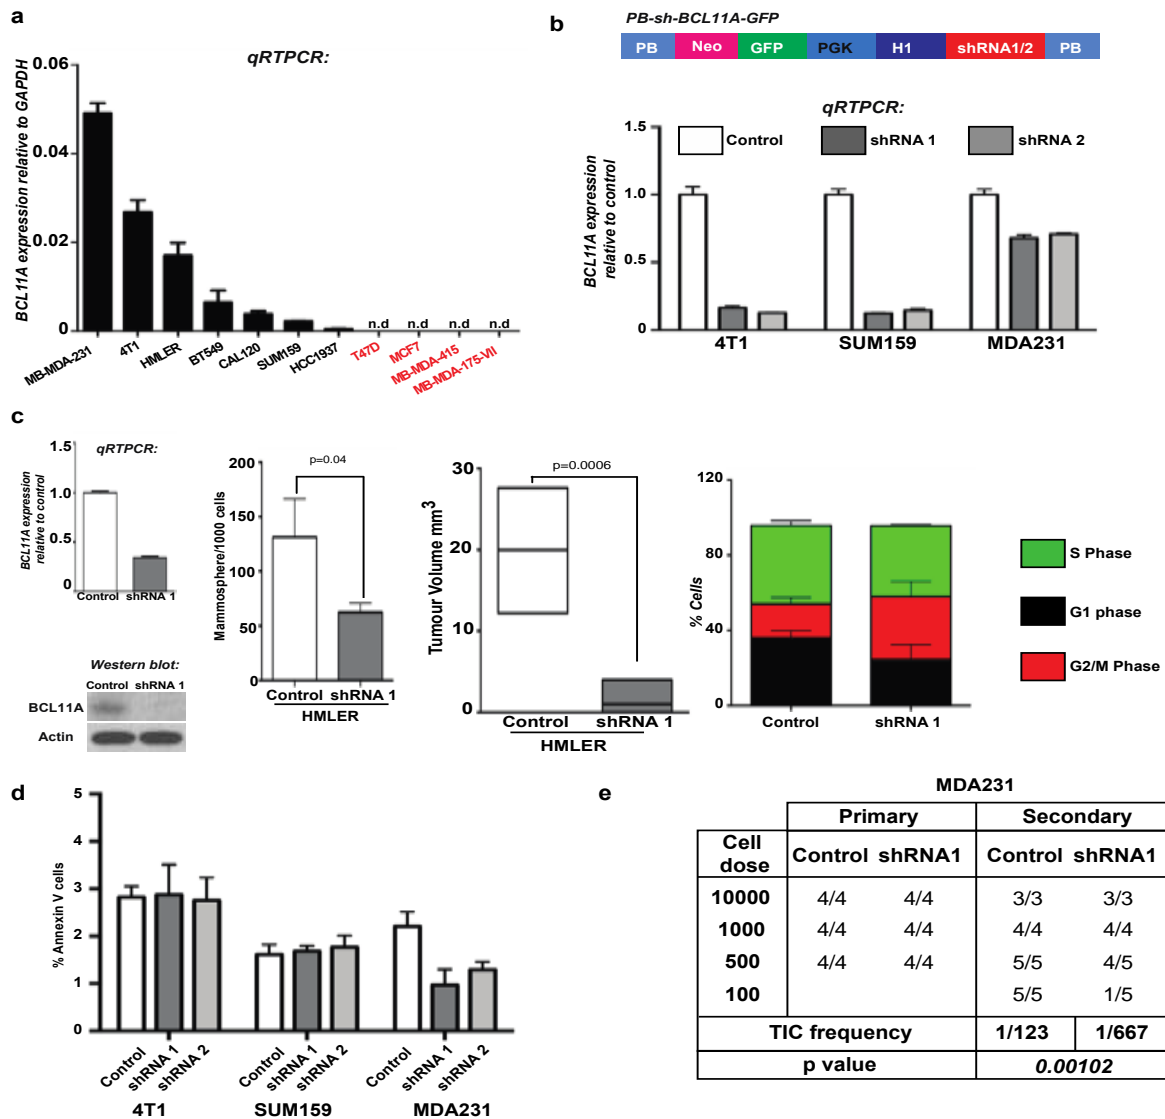

### Supplementary Figure 5. Knockdown of *BCL11A* in breast cancer cells suppresses tumour development

(a) qRT-PCR analysis of *BCL11A* expression in a panel of breast cancer cell lines. The cell lines in black font are TNBC and the cell lines in red font are luminal. n.d. indicates “not detectable”. (b) Top: Schematic of the *BCL11A* shRNA knockdown vector in the PB transposon. Bottom: qRT-PCR on 4T1, SUM159 and MDA231 cells transfected with either the control (Scramble shRNA) or the *BCL11A* shRNA 1 or 2 vectors, Data are presented as mean  $\pm$  SD (n=3). (c) *BCL11A* knockdown efficiency, mammosphere quantification, EdU cell cycle analysis and tumour data from HMLER cells transfected with control and shRNA1 vectors. Data are presented as mean  $\pm$  SD (n=3). (d) Annexin V analysis of control or shRNA cells show that *BCL11A* knockdown has no impact on cell death in tissue culture. (e) Primary and secondary limiting dilution analysis of MDA231 control or shRNA1 cells reveals a reduction in the number of TIC in knockdown cells during secondary transplants. TIC frequency and p-value were calculated using calculated using L-Calc (see methods).

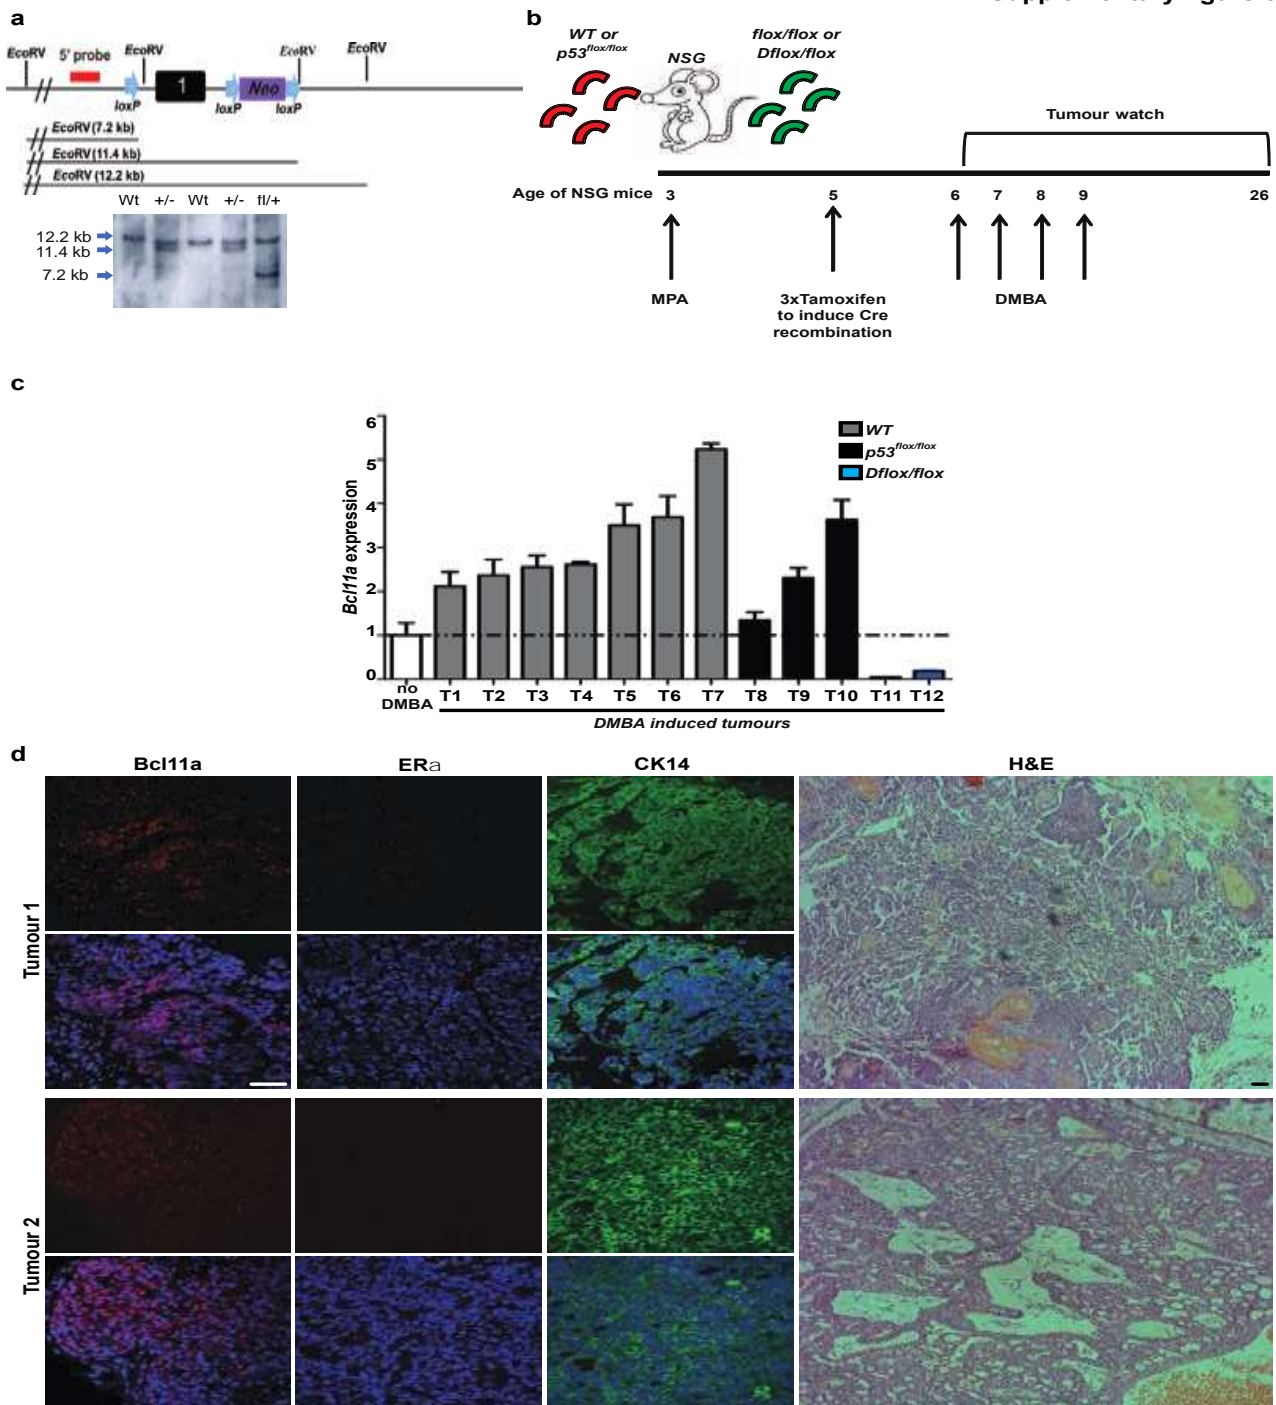

### Supplementary Figure 6. Generation of *Bcl11a* conditional knockout mouse

Schematic diagram of the *Bcl11a* conditional knockout allele used in this study. Exon 1 of *Bcl11a* is flanked by *loxP* sites for deletion. Southern analysis on the right shows detection of the conditional knockout allele in mice. WT: wild type allele. fl: conditional knockout allele. **(b)** Experimental plan for the DMBA/MPA mediated tumorigenesis protocol. Mammary fragments from WT, *flox/flox*, *p53<sup>flox/flox</sup>* and *Dflox/flox* mice were transplanted into cleared fat pads of 3-weeks old NSG mice. At the time of surgery the medroxyprogesterone acetate (MPA) slow-release-pellet was also implanted subcutaneously. The mice were allowed to recover for two weeks and then *Bcl11a* deletion was induced using three injections of tamoxifen. One week after deletion of *Bcl11a*, DMBA was administered orally; this was followed by three further doses of DMBA over three weeks. Mice were then examined weekly for tumour incidence. **(c)** qRT-PCR showing the expression levels of *Bcl11a* in DMBA induced tumours on WT, *p53<sup>flox/flox</sup>* and *Dflox/flox* genetic backgrounds. *Bcl11a* expression is normalised to total mammary epithelial cell expression not treated with DMBA. Data are presented as mean  $\pm$  SD (n=3). **(d)** IHC analysis of two DMBA induced tumours showing positive staining for BCL11A, CK14 and negative staining for ER $\alpha$ . (Scale bar = 40 $\mu$ m)

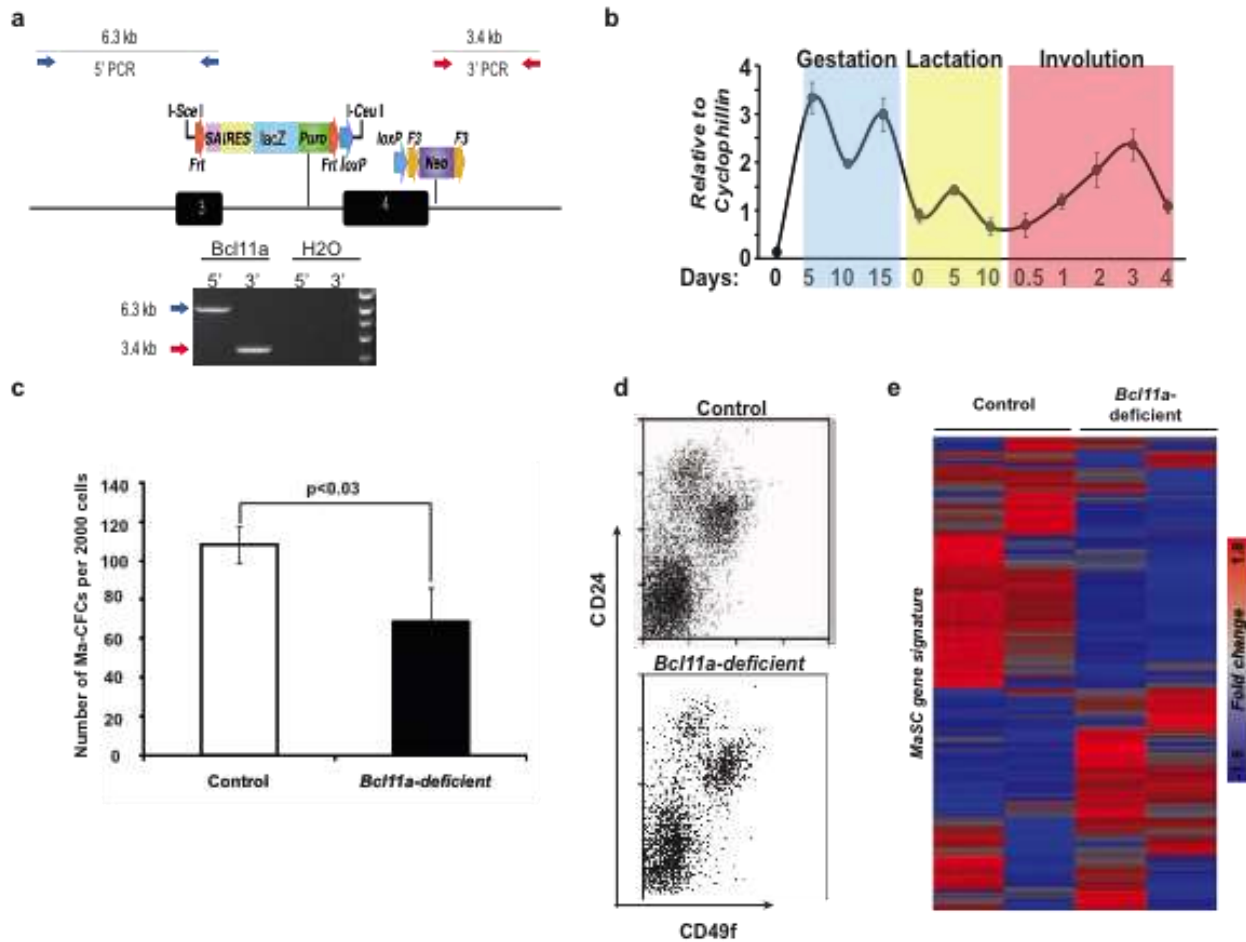

### Supplementary Figure 7. Expression of *Bcl11a* in mouse mammary epithelial cells

(a) Schematic diagram of the *Bcl11a-lacZ* allele. The SA-IRES-lacZ cassette was targeted to intron 3 of the *Bcl11a* locus. (b) Expression of *Bcl11a* at different developmental stages of mouse mammary gland development detected by qRT-PCR. Data are presented as mean  $\pm$  SD (n=3). (c) Significant decrease of Ma-CFCs upon *Bcl11a* deletion. Error bars denote standard deviation. Data are presented as mean  $\pm$  SD (n=3). T-test was performed and the p-values are displayed on the graph. (d) FACS profiles of the control (*lox/+*) and the mutant (*lox/lox*) mammary epithelial cells one week post tamoxifen injection, the time point at which cells were sorted for the fat-pad transplantation and microarray experiments. Most epithelial cell populations are still present at this stage. (e) Gene expression analysis of *Bcl11a*-deficient MaSCs focusing on stem cell signature genes. The full gene lists are in Supplementary Tables 1. *Bcl11a* deletion in the mouse reduces expression of genes that are normally expressed in stem cells whereas *BCL11A* overexpression upregulates these genes

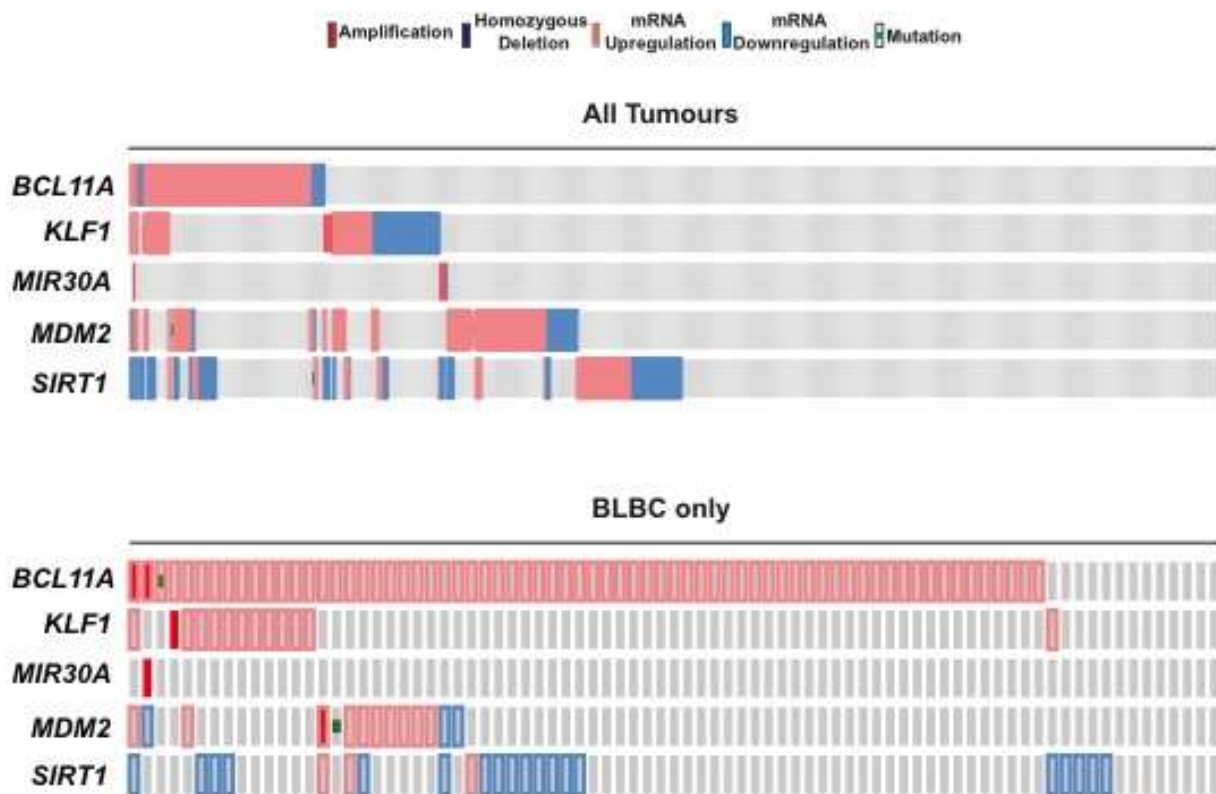

Supplementary Figure 8. TCGA olncoprint data depicting the lack of correlation between *BCL11A* expression and known *BCL11A* targets and in regulators in other cell types



Supplementary Figure. 9

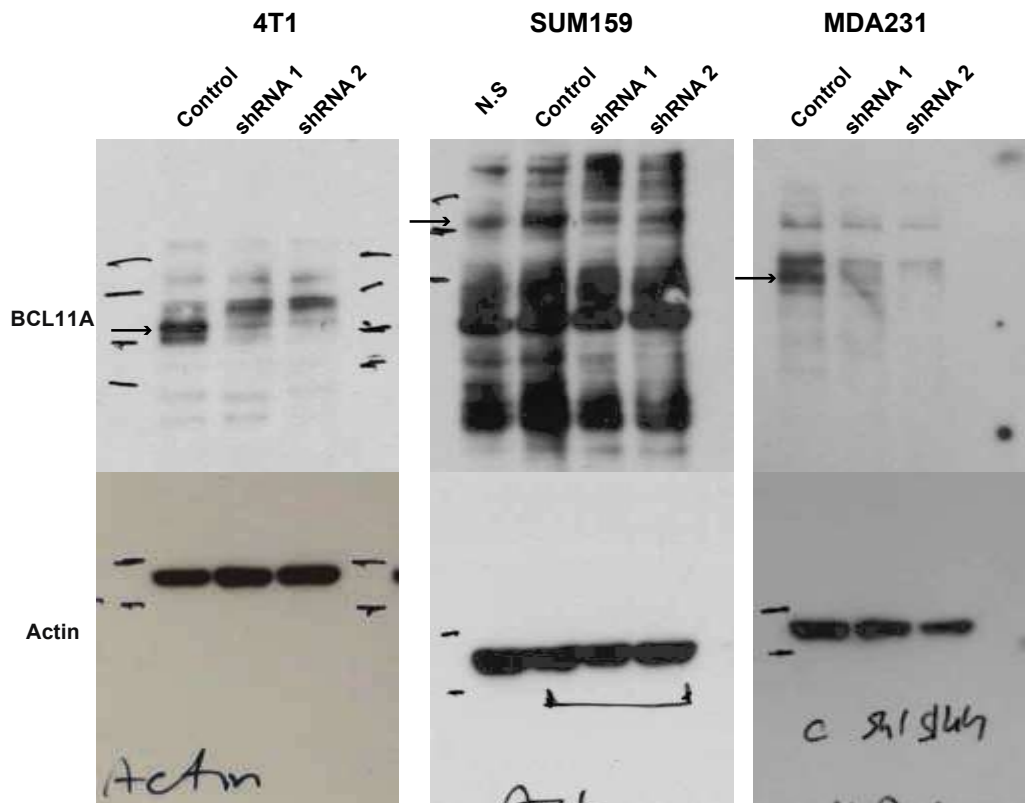

Supplementary Figure 9. Un-cropped Western blots corresponding to the cropped images in Figure 4a. N.S. indicates a non-specific lane. Arrows indicate BCL11A band.

Supplementary Table 1

| Column ID     | p-value(KO vs. WT) | Fold-Change(KO vs. WT) |
|---------------|--------------------|------------------------|
| GLYCAM1       | 0.0115838          | 1046.9                 |
| SYVN1         | 0.0436103          | 37.7442                |
| NDRG1         | 0.0380901          | 13.5986                |
| ETS2          | 0.0494484          | 5.46734                |
| TCFAP2C       | 0.0163037          | 4.536                  |
| VEGFA         | 0.00740769         | 3.2764                 |
| LMO4          | 0.0281296          | 1.5472                 |
| ETF1          | 0.0402482          | 1.51407                |
| GSK3B         | 0.0196512          | 1.26023                |
| TNFRSF11A     | 0.00204748         | 1.22492                |
| MPP6          | 0.0477028          | 1.13048                |
| NFAT5         | 0.0305385          | 1.0906                 |
| MYSM1         | 0.0254741          | 1.06206                |
| PDIA3         | 0.0715047          | 53.0613                |
| HERPUD1       | 0.0719123          | 47.5875                |
| LDHA          | 0.020959           | 13.9667                |
| IER3          | 0.0550579          | 8.0296                 |
| OAT           | 0.0180899          | 7.65035                |
| MBNL2         | 0.0177637          | 7.63077                |
| HSPA9         | 0.0493653          | 6.8779                 |
| RN18S         | 0.0736481          | 6.08801                |
| 2810423A18RIK | 0.0591128          | 5.63919                |
| SLC35B1       | 0.0371218          | 5.54558                |
| ALDH1L2       | 0.0652081          | 5.3942                 |
| H47           | 0.0615762          | 4.90228                |
| RPN2          | 0.0684499          | 4.45927                |
| SERPINH1      | 0.0665414          | 4.39015                |
| PTTG1IP       | 0.035419           | 4.28898                |
| PDLIM1        | 0.0670925          | 4.11028                |
| MYD116        | 0.0286962          | 4.06994                |
| DEB1          | 0.0496911          | 4.05518                |
| TMBIM6        | 0.0195185          | 3.8657                 |
| LOC100041569  | 0.0710527          | 3.76456                |
| 4732462B05RIK | 0.0121286          | 3.60503                |
| NSEP1         | 0.0392899          | 3.33886                |
| LOC666676     | 0.0331728          | 3.29366                |
| LOC100042427  | 0.0704957          | 3.24452                |
| ATF4          | 0.0256431          | 3.22727                |
| VCP           | 0.0612251          | 3.10911                |
| DNAJB9        | 0.0424506          | 3.04215                |
| GARS          | 0.0343635          | 3.02095                |
| LOC677551     | 0.0748016          | 3.00498                |
| TMED9         | 0.0671342          | 2.9145                 |
| D3UCLA1       | 0.0594446          | 2.88822                |
| SERINC1       | 0.0575128          | 2.8635                 |
| LOC673501     | 0.0292459          | 2.83348                |
| CYB5R1        | 0.0519013          | 2.83232                |
| NPM1          | 0.0404045          | 2.78736                |
| KLF9          | 0.014108           | 2.74291                |
| MTHFD2        | 0.0100631          | 2.68264                |
| LOC100047619  | 0.0503871          | 2.64645                |
| CXADR         | 0.0178336          | 2.63263                |
| ARL1          | 0.0416219          | 2.61082                |
| DDIT4         | 0.055177           | 2.53846                |

|               |             |         |
|---------------|-------------|---------|
| TES           | 0.00207262  | 2.53139 |
| GNL3          | 0.0338031   | 2.49353 |
| BAG1          | 0.0762813   | 2.48734 |
| HSPA5         | 0.0212666   | 2.42345 |
| MAGED1        | 0.0748936   | 2.42273 |
| SURF4         | 0.0265892   | 2.42065 |
| LOC632230     | 0.0630886   | 2.41706 |
| ATF5          | 0.0627761   | 2.36497 |
| TMEM66        | 0.051648    | 2.35549 |
| EMP2          | 0.0753342   | 2.33577 |
| GTPBP2        | 0.0792519   | 2.30018 |
| RAB2A         | 0.0255304   | 2.23765 |
| ASNS          | 0.0257098   | 2.16522 |
| FRMD6         | 0.000852198 | 2.15957 |
| ARRDC3        | 0.00222955  | 2.15749 |
| PPID          | 0.0226155   | 2.14159 |
| PSMC2         | 0.0327666   | 2.13677 |
| 4930564D15RIK | 0.0176103   | 2.136   |
| AARS          | 0.00731448  | 2.0994  |
| LOC100047184  | 0.0338157   | 2.06222 |
| LEPROTL1      | 0.0388277   | 2.03284 |
| DAG1          | 0.0657733   | 2.0142  |
| UNC5B         | 0.020868    | 1.99822 |
| 2310016C08RIK | 0.0390916   | 1.93367 |
| CAR9          | 0.0668378   | 1.9326  |
| PHF10         | 0.0307945   | 1.92007 |
| ZFP131        | 0.00138053  | 1.90832 |
| AMOTL1        | 0.0140476   | 1.90574 |
| MATR3         | 0.0662897   | 1.90277 |
| EIF4A1        | 0.0630459   | 1.89525 |
| XBP1          | 0.0517098   | 1.845   |
| ANGPTL6       | 0.067795    | 1.83673 |
| CLIC4         | 0.0230876   | 1.82725 |
| DNAJB1        | 0.0153923   | 1.82499 |
| ATP6AP1       | 0.0628326   | 1.82357 |
| LSM14A        | 0.0369352   | 1.81944 |
| PHF17         | 0.0250547   | 1.81786 |
| 5430434G16RIK | 0.0285426   | 1.80986 |
| PDAP1         | 0.00136208  | 1.79807 |
| PTP4A2        | 0.0256614   | 1.79342 |
| 5830407P18RIK | 0.0696165   | 1.7851  |
| LARS          | 0.0358683   | 1.78468 |
| APP           | 0.00752626  | 1.77956 |
| MAP3K7IP2     | 0.0134131   | 1.77925 |
| MAPRE1        | 0.0817428   | 1.7565  |
| SGPP1         | 0.0170613   | 1.73542 |
| EIF1A         | 0.0198072   | 1.73532 |
| C230075M21RIK | 0.0527679   | 1.72364 |
| KLF7          | 0.065102    | 1.71812 |
| TDE2          | 0.00853208  | 1.69764 |
| ACBD3         | 0.0818107   | 1.69487 |
| NPC1          | 0.046168    | 1.6948  |
| ARPC2         | 0.0449064   | 1.68939 |
| CHD7          | 0.0419693   | 1.68736 |
| B230350I06RIK | 0.00278371  | 1.6814  |
| ATXN1         | 0.0459388   | 1.67093 |
| TMEM11        | 0.0570433   | 1.6698  |
| SEPT2         | 0.0282158   | 1.66913 |

|                  |            |         |
|------------------|------------|---------|
| EIF5             | 0.0747865  | 1.65601 |
| HDLBP            | 0.0384094  | 1.63695 |
| RHBDD1           | 0.0263829  | 1.62166 |
| CDR2             | 0.00503554 | 1.60396 |
| SEC11C           | 0.0747305  | 1.60273 |
| SFRS1            | 0.0118548  | 1.59675 |
| PDLIM7           | 0.0662166  | 1.57859 |
| PLA2G12A         | 0.0307543  | 1.57598 |
| SRR              | 0.0250287  | 1.57565 |
| YWHAZ            | 0.00296551 | 1.57409 |
| SCL0002975.1_346 | 0.0323048  | 1.56854 |
| GDF15            | 0.0175754  | 1.55388 |
| NFE2L1           | 0.0380368  | 1.54195 |
| LOC100044779     | 0.0429152  | 1.53997 |
| SLC39A6          | 0.0514506  | 1.53002 |
| PALLD            | 0.0155917  | 1.52999 |
| ZBTB7A           | 0.0161306  | 1.52203 |
| PIGA             | 0.0424155  | 1.51847 |
| 2310004N11RIK    | 0.0198673  | 1.5155  |
| LMAN1            | 0.0808293  | 1.49971 |
| TBC1D20          | 0.0331891  | 1.49174 |
| SERTAD2          | 0.0167245  | 1.48949 |
| LOC385825        | 0.00967628 | 1.48925 |
| LOC100040573     | 0.00297983 | 1.48685 |
| TRIM39           | 0.00136037 | 1.48316 |
| GOT2             | 0.0788918  | 1.48068 |
| B230363H02RIK    | 0.0197226  | 1.48016 |
| NOL5             | 0.00090104 | 1.47976 |
| TRIB3            | 0.00509689 | 1.46915 |
| ATP6V1A          | 0.0156408  | 1.46387 |
| UBE2L3           | 0.00718441 | 1.46192 |
| 4833414E09RIK    | 0.0558558  | 1.45836 |
| DDX3X            | 0.0148139  | 1.45768 |
| LOC386218        | 0.0801434  | 1.45513 |
| 2600005C20RIK    | 0.00524429 | 1.45263 |
| CCT4             | 0.0511784  | 1.45207 |
| ZFC3H1           | 0.00199781 | 1.45182 |
| LOC100041388     | 0.0332207  | 1.44971 |
| TRIO             | 0.0405929  | 1.43583 |
| PJA2             | 0.0372816  | 1.43147 |
| FNDC3B           | 0.0206864  | 1.42638 |
| AI450540         | 0.0112198  | 1.42455 |
| GHITM            | 0.0338714  | 1.42416 |
| SLAIN2           | 0.0222799  | 1.42162 |
| ZFP292           | 0.0634885  | 1.4214  |
| ACTR3            | 0.0246466  | 1.41916 |
| 3300001P08RIK    | 0.0702191  | 1.4114  |
| AHCYL1           | 0.0136768  | 1.40613 |
| RNF11            | 0.00483154 | 1.40033 |
| BRD2             | 0.00235381 | 1.398   |
| RNF103           | 0.0798836  | 1.39745 |
| GORASP2          | 0.035533   | 1.39319 |
| AMPD3            | 0.0430843  | 1.38945 |
| RHBDL2           | 0.070058   | 1.38845 |
| SLC30A5          | 0.0363352  | 1.38714 |
| MAT2A            | 0.0186903  | 1.3806  |
| LOC628101        | 0.0706715  | 1.37652 |
| A830055I09RIK    | 0.0236358  | 1.37426 |

|                |            |         |
|----------------|------------|---------|
| NDEL1          | 0.00655472 | 1.37324 |
| LOC386005      | 0.0112833  | 1.37321 |
| DNAJC5         | 0.0377733  | 1.37006 |
| B930008G03RIK  | 0.0400428  | 1.3696  |
| PHXR4          | 0.0385397  | 1.36858 |
| RAP1B          | 0.0760382  | 1.36687 |
| C330049H01RIK  | 0.028841   | 1.3646  |
| HYOU1          | 0.0296663  | 1.3614  |
| DAZAP2         | 0.0638268  | 1.361   |
| SEC63          | 0.0810866  | 1.36087 |
| CTAGE5         | 0.0126316  | 1.36076 |
| 4933407C03RIK  | 0.014583   | 1.35353 |
| XPOT           | 0.0574847  | 1.35342 |
| AARD           | 0.0385003  | 1.35306 |
| LOC386021      | 0.0361196  | 1.35305 |
| B930090K24RIK  | 0.00992503 | 1.3529  |
| CDKN1A         | 0.0451696  | 1.35016 |
| BC004022       | 0.02455    | 1.34862 |
| BTA1F1         | 0.0145028  | 1.34695 |
| A530089A20RIK  | 0.0129494  | 1.34634 |
| IMP3           | 0.0667546  | 1.33763 |
| 2810003C17RIK  | 0.0299259  | 1.33563 |
| WASL           | 0.0390466  | 1.33314 |
| LOC382157      | 0.0809253  | 1.33162 |
| LOC632684      | 0.0142012  | 1.33152 |
| CCT8           | 0.00148574 | 1.32523 |
| BC003940       | 0.0338723  | 1.3243  |
| RNF145         | 0.0564885  | 1.32331 |
| TMEM68         | 0.0304339  | 1.32297 |
| SLC25A33       | 0.0183183  | 1.31955 |
| TIMM8A1        | 0.0359779  | 1.31748 |
| RASA1          | 0.0437328  | 1.31729 |
| LOC100045882   | 0.00166876 | 1.31444 |
| RBM13          | 0.0726117  | 1.31037 |
| SLC4A7         | 0.0267135  | 1.30995 |
| BC030476       | 0.0480239  | 1.30921 |
| MCL1           | 0.00350473 | 1.30289 |
| STARD5         | 0.0564875  | 1.30258 |
| LOC386078      | 0.0240107  | 1.30182 |
| MRPL50         | 0.0196983  | 1.29935 |
| CALU           | 0.0662393  | 1.29437 |
| SUPT5H         | 0.024837   | 1.29063 |
| E030027H19RIK  | 0.0560051  | 1.28855 |
| FCHO2          | 0.0821821  | 1.28372 |
| UBE2O          | 0.0110508  | 1.27679 |
| C530050E15RIK  | 0.00414077 | 1.27367 |
| ZFP263         | 0.0661815  | 1.27175 |
| NAP1L4         | 0.00343848 | 1.27164 |
| SEC24D         | 0.0176635  | 1.27019 |
| TFG            | 0.0743444  | 1.26857 |
| FAM171B        | 0.016221   | 1.26728 |
| SCL0004190.1_3 | 0.0815645  | 1.26688 |
| 5330401F18RIK  | 0.00885043 | 1.26512 |
| CCRN4L         | 0.0314148  | 1.2631  |
| GNA13          | 0.0681361  | 1.25904 |
| C230070D10RIK  | 0.0228396  | 1.25894 |
| 2700092H06RIK  | 0.0132383  | 1.25804 |
| EIF4A2         | 0.0440495  | 1.25632 |

|               |             |         |
|---------------|-------------|---------|
| 2810403A07RIK | 0.0792377   | 1.25478 |
| LOC385068     | 0.0347998   | 1.25456 |
| M6PR          | 0.0411173   | 1.25438 |
| C730026J16    | 0.0254506   | 1.25402 |
| IQGAP1        | 0.0381867   | 1.25247 |
| TRUB2         | 0.0268411   | 1.25179 |
| LOC622404     | 0.0555303   | 1.24914 |
| SLC38A2       | 0.0617957   | 1.24883 |
| 2010009J12RIK | 0.0321995   | 1.24539 |
| LOC639931     | 0.0681379   | 1.24512 |
| SMEK2         | 0.0355666   | 1.24503 |
| SLC39A7       | 0.0693955   | 1.24047 |
| LOC100041797  | 0.0726652   | 1.23998 |
| GALNT2        | 0.0618391   | 1.23923 |
| CCNT1         | 0.0835955   | 1.23839 |
| RBM9          | 0.0113845   | 1.23562 |
| IRF2          | 0.0252141   | 1.23533 |
| 0610007L01RIK | 0.027303    | 1.23233 |
| ZFP639        | 0.0797507   | 1.23219 |
| SPCS3         | 0.0763736   | 1.23184 |
| PNRC2         | 0.0708981   | 1.2299  |
| STRAP         | 0.0779072   | 1.22911 |
| KCTD4         | 0.0611754   | 1.22871 |
| WDR75         | 0.0408621   | 1.22818 |
| PTBP1         | 0.0311989   | 1.22808 |
| BC031781      | 0.0164027   | 1.228   |
| AHCTF1        | 0.015383    | 1.22675 |
| NRD1          | 0.0514927   | 1.22529 |
| 6720458F09RIK | 0.0468486   | 1.22383 |
| TSHZ1         | 0.069827    | 1.22379 |
| RCOR1         | 0.041274    | 1.22339 |
| PIP5K1A       | 0.0186022   | 1.22155 |
| GPT2          | 0.0748073   | 1.22075 |
| THYN1         | 0.0655867   | 1.22057 |
| TFRC          | 0.0532706   | 1.21564 |
| D130077B20RIK | 0.0109502   | 1.21515 |
| KRT15         | 0.0585891   | 1.21381 |
| AHI1          | 0.00183642  | 1.21276 |
| HNRPM         | 0.0637759   | 1.21228 |
| D2ERTD391E    | 0.0240117   | 1.20955 |
| 1500001L15RIK | 0.0639766   | 1.20918 |
| NKTR          | 0.0140592   | 1.20829 |
| 2810426P10RIK | 0.0827519   | 1.20746 |
| ELAVL1        | 0.0172692   | 1.20464 |
| 2310007O11RIK | 0.0460993   | 1.20272 |
| C630030A18RIK | 0.0199023   | 1.20201 |
| SILG111       | 0.0372419   | 1.20169 |
| 5330403J18RIK | 0.0298877   | 1.20167 |
| EIF2S2        | 0.00033657  | 1.20002 |
| 5031436O03RIK | 0.0183185   | 1.19835 |
| ZC3H18        | 0.00157172  | 1.19821 |
| CCND2         | 0.0644247   | 1.19487 |
| SIAH1A        | 0.0120281   | 1.19486 |
| DDX1          | 0.0311899   | 1.19378 |
| WFS1          | 0.0802049   | 1.19072 |
| RRP1B         | 0.000245274 | 1.18898 |
| 5033413D16RIK | 0.0418341   | 1.18759 |
| LOC216443     | 0.0248742   | 1.18638 |

|                 |            |         |
|-----------------|------------|---------|
| 2810407C02RIK   | 0.0450203  | 1.18534 |
| RBMS1           | 0.0840315  | 1.18378 |
| G3BP2           | 0.0301857  | 1.18185 |
| GAPVD1          | 0.00752808 | 1.18162 |
| AI314180        | 0.0293066  | 1.18042 |
| RAB1            | 0.00496573 | 1.17871 |
| PTK2            | 0.00826469 | 1.17834 |
| PRDM2           | 0.00218927 | 1.17676 |
| PPP3CA          | 0.0622103  | 1.17667 |
| E130318A13RIK   | 0.0418311  | 1.17635 |
| VPS54           | 0.0486565  | 1.1739  |
| 4930461P20RIK   | 0.0349111  | 1.17198 |
| LOC100044376    | 0.00341812 | 1.17196 |
| BRD3            | 0.0747018  | 1.17169 |
| CCNL1           | 0.0631192  | 1.17048 |
| ISCA1           | 0.011329   | 1.17023 |
| 2310051N18RIK   | 0.0199717  | 1.16994 |
| SERBP1          | 0.0747354  | 1.16993 |
| ZFP148          | 0.00421232 | 1.16921 |
| CBFB            | 0.0423377  | 1.16825 |
| NIPBL           | 0.0775885  | 1.16788 |
| ANKHD1          | 0.0535946  | 1.1668  |
| TUT1            | 0.0412818  | 1.16578 |
| DOKIST3         | 0.0368873  | 1.16573 |
| YTHDF1          | 0.0067695  | 1.16571 |
| RAP2C           | 0.020734   | 1.16486 |
| CRIM1           | 0.0452301  | 1.16442 |
| ZRANB2          | 0.076342   | 1.16164 |
| DHX15           | 0.0265177  | 1.16135 |
| 9630032J03RIK   | 0.0505558  | 1.1606  |
| NPM3            | 0.0697828  | 1.16042 |
| LOC386360       | 0.0116986  | 1.15903 |
| ZXDA            | 0.011716   | 1.15806 |
| USO1            | 0.079429   | 1.15804 |
| EDNRB           | 0.0783654  | 1.15758 |
| NFKBIZ          | 0.00904545 | 1.15578 |
| PDPK1           | 0.0167721  | 1.15258 |
| RSL1D1          | 0.076662   | 1.15257 |
| D0HXS9928E      | 0.0842822  | 1.15164 |
| ARHGAP17        | 0.0294607  | 1.15102 |
| 6720477C19RIK   | 0.0229761  | 1.15086 |
| HTATSF1         | 0.0272365  | 1.1508  |
| ARL8B           | 0.0690676  | 1.1506  |
| OSR1            | 0.0834256  | 1.15047 |
| 5430417L22RIK   | 0.068416   | 1.14985 |
| ARMCX1          | 0.0772276  | 1.1495  |
| NOL14           | 0.026541   | 1.14929 |
| LOC100046817    | 0.0124591  | 1.14927 |
| DUSP4           | 8.96E-05   | 1.14755 |
| IER3IP1         | 0.0688004  | 1.14712 |
| 5830406C17RIK   | 0.00401435 | 1.14629 |
| EIF3A           | 0.0218889  | 1.14609 |
| SCL0002315.1_12 | 0.0177747  | 1.14443 |
| CHKA            | 0.0650491  | 1.14417 |
| A730098D12RIK   | 0.0779526  | 1.14376 |
| LOC100039607    | 0.00241932 | 1.14318 |
| USP39           | 0.0569984  | 1.14268 |
| 2310037I24RIK   | 0.0444974  | 1.14155 |

|                    |             |         |
|--------------------|-------------|---------|
| ERO1LB             | 0.077709    | 1.14148 |
| 9130011J15RIK      | 0.0189891   | 1.14009 |
| 1110001P04RIK      | 0.0453299   | 1.13963 |
| C80913             | 0.0397766   | 1.13957 |
| LHFPL2             | 0.00565402  | 1.13951 |
| RARS               | 0.0517262   | 1.13944 |
| TAF15              | 0.0183504   | 1.13828 |
| ARF2               | 0.0294974   | 1.13793 |
| HS3ST3B1           | 0.0147083   | 1.13789 |
| HSPB6              | 0.063335    | 1.13767 |
| IGF1R              | 0.0342507   | 1.13723 |
| ZWINT              | 0.0178771   | 1.13716 |
| DDX26              | 0.0565768   | 1.13707 |
| TCOF1              | 0.000350485 | 1.13674 |
| SYNCRIP            | 0.00465206  | 1.13632 |
| SRA1               | 0.0274233   | 1.13592 |
| EXOSC1             | 0.0742061   | 1.13542 |
| 2610101N10RIK      | 0.0696579   | 1.13475 |
| LRRC59             | 0.0382503   | 1.13446 |
| MED26              | 0.0680082   | 1.13396 |
| 9430008C03RIK      | 0.0582019   | 1.1334  |
| ODZ2               | 0.0347469   | 1.13332 |
| HSPD1              | 0.0452864   | 1.13326 |
| 5730494N06RIK      | 0.0449191   | 1.13323 |
| C730026O12RIK      | 0.0175504   | 1.13283 |
| CEBPG              | 0.0496107   | 1.13272 |
| FASTKD5            | 0.0758444   | 1.13185 |
| A630082K20RIK      | 0.0357983   | 1.13167 |
| ANP32E             | 0.0325609   | 1.13074 |
| UCK2               | 0.0531995   | 1.13025 |
| ENSMUSG00000074075 | 0.0201671   | 1.12988 |
| AI115600           | 0.0277822   | 1.12979 |
| 2610020C11RIK      | 0.000704179 | 1.12815 |
| LUC7L              | 0.0288471   | 1.12813 |
| TCERG1             | 0.0213594   | 1.12789 |
| TMEM63B            | 0.0426256   | 1.12717 |
| TMEM97             | 0.0820599   | 1.12695 |
| 2510012J08RIK      | 0.0357656   | 1.12599 |
| C330006D17RIK      | 0.0100217   | 1.12585 |
| TSSC8              | 0.000886579 | 1.12526 |
| 5730405I09RIK      | 0.0188509   | 1.12477 |
| CCDC86             | 0.0377796   | 1.1245  |
| A730021C13RIK      | 0.00382688  | 1.12422 |
| RUVBL2             | 0.0712747   | 1.12405 |
| C530036F05RIK      | 0.0196028   | 1.1235  |
| PATL1              | 0.0163141   | 1.12188 |
| ASCC2              | 0.0486624   | 1.12146 |
| RABGEF1            | 0.0801622   | 1.12093 |
| LOC100043821       | 0.0546252   | 1.12046 |
| DAD1               | 0.0594016   | 1.12043 |
| 1110029L17RIK      | 0.0522243   | 1.12016 |
| NAPB               | 0.00310464  | 1.11972 |
| A630056H20RIK      | 0.00647165  | 1.1182  |
| ZDHHC21            | 0.014315    | 1.11806 |
| B230387C07RIK      | 0.065464    | 1.11801 |
| HUWE1              | 0.00631252  | 1.11755 |
| YTHDF2             | 0.0654789   | 1.11729 |
| HS3ST3A1           | 0.0702617   | 1.11542 |



|                 |             |         |
|-----------------|-------------|---------|
| JMJD3           | 0.0721425   | 1.11507 |
| B230386D16RIK   | 0.0425729   | 1.11471 |
| EPHB1           | 0.0668196   | 1.11469 |
| D17WSU104E      | 0.0707713   | 1.11332 |
| 6030458P06RIK   | 0.00714127  | 1.11265 |
| 6430540M20RIK   | 0.0111407   | 1.11225 |
| EPRS            | 0.0786996   | 1.11167 |
| LOC100044172    | 0.0372759   | 1.11084 |
| C230043G09RIK   | 0.078572    | 1.11078 |
| AFTPH           | 0.0523372   | 1.11065 |
| DDX26B          | 0.0623933   | 1.1106  |
| EIF3S8          | 0.0705829   | 1.11022 |
| ANKRD11         | 0.0123771   | 1.10995 |
| E330027P06RIK   | 0.0549151   | 1.1091  |
| UBE2E2          | 0.0120468   | 1.10895 |
| TCP1            | 0.0375911   | 1.10852 |
| PGRMC2          | 0.00119574  | 1.10808 |
| CREB5           | 0.0396605   | 1.10759 |
| C330023M02RIK   | 0.043827    | 1.10732 |
| DUSP11          | 0.0514681   | 1.10725 |
| HSD3B2          | 0.0775332   | 1.10725 |
| 2010007K12RIK   | 0.0211633   | 1.1072  |
| SPG20           | 0.000575066 | 1.10685 |
| B930011A14RIK   | 0.0550849   | 1.10608 |
| TESK1           | 0.0707215   | 1.10562 |
| RAB33B          | 0.0340133   | 1.10519 |
| ABI2            | 0.0079958   | 1.10445 |
| 2610528B01RIK   | 0.0253706   | 1.10396 |
| HECTD1          | 0.00818801  | 1.10326 |
| A930004J17RIK   | 0.0229614   | 1.10288 |
| SARS            | 0.0487723   | 1.10286 |
| 9330180L10RIK   | 0.0632532   | 1.10277 |
| B230208H17RIK   | 0.000493433 | 1.10221 |
| PUM1            | 0.0500008   | 1.10197 |
| UBE4B           | 0.0692614   | 1.10179 |
| CSNK2A1-RS3     | 0.0470877   | 1.10164 |
| NHLRC2          | 0.0171242   | 1.10163 |
| MSH6            | 0.0615565   | 1.10093 |
| ATG2B           | 0.0296601   | 1.1009  |
| R3HDM1          | 0.0496784   | 1.10087 |
| 2410002F23RIK   | 0.063688    | 1.10038 |
| IPO5            | 0.014224    | 1.10025 |
| B230213E18RIK   | 0.0757012   | 1.10015 |
| FOSL2           | 0.0744274   | 1.10006 |
| GOLGA3          | 0.0311349   | 1.0995  |
| PRKRIR          | 0.0656386   | 1.09945 |
| CHUK            | 0.0107028   | 1.09882 |
| CSDA            | 0.00489669  | 1.09855 |
| LRRC28          | 0.0111325   | 1.09767 |
| UGP2            | 0.0154432   | 1.09734 |
| SULT1A1         | 0.0807816   | 1.09699 |
| STT3A           | 0.0390678   | 1.09677 |
| MFAP1B          | 0.0630782   | 1.0963  |
| E430033B07RIK   | 0.0446631   | 1.09532 |
| BBX             | 0.0175432   | 1.09498 |
| MAST2           | 0.06025     | 1.09484 |
| SCL0004020.1_31 | 0.0148467   | 1.09471 |
| SEC31A          | 0.073395    | 1.09456 |

|                 |             |         |
|-----------------|-------------|---------|
| ADAM9           | 0.00513106  | 1.09436 |
| SSFA2           | 0.041822    | 1.09428 |
| ARL5B           | 0.0667491   | 1.09393 |
| CLDND1          | 0.0108185   | 1.09373 |
| FAM129A         | 0.0348774   | 1.09366 |
| HMGB2L1         | 0.00937019  | 1.09349 |
| RIOK1           | 0.0140593   | 1.09335 |
| LOC640972       | 0.0832942   | 1.09283 |
| LOC100046891    | 0.0812128   | 1.09249 |
| 4933432B13RIK   | 0.0117666   | 1.09242 |
| TAF13           | 0.000345728 | 1.09228 |
| SAR1A           | 0.0236314   | 1.09222 |
| VGLL4           | 0.0278014   | 1.09182 |
| 6430562A12RIK   | 0.00578776  | 1.09131 |
| EIF4EBP2        | 0.0277484   | 1.09105 |
| GRPEL1          | 0.0701818   | 1.09039 |
| PA2G4           | 0.0125248   | 1.09005 |
| C730046C01RIK   | 0.012863    | 1.08987 |
| LOC100046483    | 0.0207642   | 1.08967 |
| TMEM93          | 0.0306805   | 1.08955 |
| ANKRD49         | 0.0473284   | 1.08927 |
| 2410016O06RIK   | 0.00832156  | 1.08904 |
| LOC100041567    | 0.000224179 | 1.08902 |
| 2310079P03RIK   | 0.0584297   | 1.0882  |
| A530082L16RIK   | 0.0103266   | 1.08792 |
| UBQLN1          | 0.0471097   | 1.08737 |
| TXNDC12         | 0.0595766   | 1.0868  |
| SFRS4           | 0.0433524   | 1.0865  |
| GATAD2B         | 0.0554915   | 1.0863  |
| SCL0002785.1_49 | 0.0471539   | 1.08518 |
| LOC100046841    | 0.0590711   | 1.08487 |
| PLAA            | 0.0225664   | 1.08363 |
| E030040G24RIK   | 0.0459056   | 1.0833  |
| MAPK6           | 0.0790551   | 1.08315 |
| A130039H09RIK   | 0.0285578   | 1.08292 |
| LIMS2           | 0.0615164   | 1.08274 |
| ARPC5L          | 0.0765401   | 1.08235 |
| A730094H17RIK   | 0.0450112   | 1.08225 |
| A430096A09RIK   | 0.00350776  | 1.08119 |
| NMU             | 0.0632197   | 1.08118 |
| CITED2          | 0.0364196   | 1.08114 |
| GBE1            | 0.0319895   | 1.08042 |
| 1810055E12RIK   | 0.0441545   | 1.08042 |
| SHC1            | 0.0666061   | 1.08021 |
| MTERFD1         | 0.0527988   | 1.08008 |
| LOC545056       | 0.0132827   | 1.07997 |
| SACM1L          | 0.0335637   | 1.07991 |
| PEX11A          | 0.0148735   | 1.07977 |
| STXBP3          | 0.0756435   | 1.07938 |
| BIRC2           | 0.0217221   | 1.07915 |
| CASC3           | 0.00822219  | 1.07901 |
| BIRC1CL         | 0.0814493   | 1.0788  |
| CDC2L5          | 0.0299354   | 1.07863 |
| PAPPA           | 0.0711519   | 1.07862 |
| 9630021O20RIK   | 0.0583959   | 1.07792 |
| 9130005N14RIK   | 0.0336476   | 1.07789 |
| TNS1            | 0.00669315  | 1.07743 |
| HPBRII4         | 0.0632245   | 1.07742 |

|               |             |         |
|---------------|-------------|---------|
| NDUFA10       | 0.0676991   | 1.07718 |
| WIPF2         | 0.00223778  | 1.07711 |
| DCUN1D5       | 0.000731884 | 1.07705 |
| ATG16L1       | 0.0580533   | 1.07681 |
| TLK2          | 0.0576693   | 1.07576 |
| ARMCX3        | 0.0327027   | 1.07515 |
| NAMPT         | 0.0413757   | 1.07497 |
| HAX1          | 0.0734338   | 1.07483 |
| A130047F11RIK | 0.0588331   | 1.07463 |
| OSBP          | 0.061821    | 1.07443 |
| HYAL1         | 0.0495127   | 1.07442 |
| 9530062M13RIK | 0.0511659   | 1.07433 |
| BAG2          | 0.0215762   | 1.07421 |
| LUC7L2        | 0.076081    | 1.07381 |
| NCRNA00117    | 0.0713186   | 1.07371 |
| PARD6A        | 0.0519627   | 1.0735  |
| FIN14         | 0.0222183   | 1.07332 |
| MTAP1B        | 0.000913543 | 1.07327 |
| LOC100047794  | 0.0668872   | 1.07276 |
| DTNB          | 0.0316582   | 1.07205 |
| RRP12         | 0.0291556   | 1.07188 |
| GDF10         | 0.0306525   | 1.07169 |
| 1110007M04RIK | 0.0611767   | 1.0715  |
| LOC100047323  | 0.0543415   | 1.07135 |
| BCAT2         | 0.0442628   | 1.07116 |
| LOC381739     | 0.0431577   | 1.07048 |
| 9130422G05RIK | 0.0336779   | 1.07006 |
| BAG5          | 0.0239648   | 1.06932 |
| 6530401O14RIK | 0.0256452   | 1.06865 |
| 2400010D15RIK | 0.0284985   | 1.06861 |
| 0610009J05RIK | 0.0787182   | 1.06819 |
| CNOT4         | 0.033067    | 1.068   |
| LOC100048645  | 0.0121439   | 1.06782 |
| LOC386246     | 0.0559469   | 1.06756 |
| DDX27         | 0.083415    | 1.06754 |
| RRAS2         | 0.00401464  | 1.06697 |
| A230013K13RIK | 0.0588476   | 1.06644 |
| IMPAD1        | 0.0410716   | 1.06632 |
| ECEL1         | 0.0550143   | 1.06622 |
| EG433182      | 0.0270497   | 1.06614 |
| EP300         | 0.0646713   | 1.06583 |
| LOC100044566  | 0.0292019   | 1.06561 |
| PREP          | 0.0793014   | 1.06558 |
| RAD23B        | 0.00797853  | 1.06512 |
| 9130020K20RIK | 0.0442333   | 1.06511 |
| LOC100047419  | 0.0492304   | 1.06462 |
| SLC25A39      | 0.0319843   | 1.06453 |
| D330001F19RIK | 0.00883507  | 1.06437 |
| TOR1B         | 0.0261033   | 1.06422 |
| IL6ST         | 0.0525715   | 1.06369 |
| AUTS2         | 0.00161096  | 1.0634  |
| D230047F17RIK | 0.021436    | 1.06339 |
| AI847670      | 0.0554138   | 1.06326 |
| A130004B21RIK | 0.028701    | 1.06324 |
| 2810008M24RIK | 0.00928179  | 1.06291 |
| GOLGB1        | 0.045854    | 1.06263 |
| IDE           | 0.0627551   | 1.06249 |
| COG8          | 0.073108    | 1.06246 |

|               |             |         |
|---------------|-------------|---------|
| LOC100046343  | 0.0127738   | 1.06243 |
| APH1B         | 0.0262149   | 1.06217 |
| C230055K21RIK | 0.00449773  | 1.06205 |
| 9530005P22RIK | 0.0718825   | 1.0618  |
| NIBAN         | 0.0802005   | 1.06174 |
| COBLL1        | 0.0668264   | 1.06157 |
| FAM168B       | 0.0466494   | 1.06152 |
| ADORA2B       | 0.0206988   | 1.06098 |
| KIF3A         | 0.067353    | 1.06088 |
| 9630005B22RIK | 0.0134901   | 1.06071 |
| CDH23         | 0.0101631   | 1.06068 |
| 6430510M02RIK | 0.0455131   | 1.06064 |
| PURB          | 0.0279173   | 1.06061 |
| LOC671878     | 0.0122314   | 1.06028 |
| SNUPN         | 0.0749016   | 1.05986 |
| LEO1          | 0.0505432   | 1.05982 |
| B130008O17RIK | 0.0415895   | 1.0595  |
| PAPOLA        | 0.00101661  | 1.05934 |
| USP33         | 0.0446985   | 1.05919 |
| CREB3L2       | 0.0834707   | 1.05916 |
| E330031M19RIK | 0.0699788   | 1.05888 |
| ZFYVE20       | 0.0401408   | 1.05877 |
| 9030425E11RIK | 0.0416945   | 1.05869 |
| LIN54         | 0.0566464   | 1.05848 |
| XAB1          | 0.0598041   | 1.05838 |
| TXNDC13       | 0.0319223   | 1.05765 |
| WHSC2         | 0.0392252   | 1.05741 |
| D230046F09RIK | 0.0334314   | 1.05736 |
| TRNT1         | 0.0274379   | 1.05701 |
| ADAMTS18      | 0.0474681   | 1.0567  |
| TGFBR1        | 0.00888551  | 1.05651 |
| 4921506J03RIK | 0.0144873   | 1.05613 |
| HIGD1A        | 0.0150046   | 1.056   |
| TTC14         | 0.000316498 | 1.05591 |
| SFRS11        | 0.0844056   | 1.05542 |
| ZC3H6         | 0.0156883   | 1.05531 |
| PK3           | 0.0805574   | 1.05529 |
| BAT2D         | 0.0845103   | 1.05524 |
| TNPO3         | 0.00544093  | 1.05498 |
| 4921513D23RIK | 0.0627338   | 1.05493 |
| ZMIZ1         | 0.038093    | 1.05483 |
| CHD1          | 0.0249425   | 1.05466 |
| NOL8          | 0.0216216   | 1.05456 |
| VAMP2         | 0.0447594   | 1.05436 |
| MLL3          | 0.0192111   | 1.05431 |
| FOXJ3         | 0.00516726  | 1.05422 |
| LOC383077     | 0.00816754  | 1.05408 |
| DDX50         | 0.060691    | 1.05387 |
| A930007B11RIK | 0.00593028  | 1.05361 |
| GMPPB         | 0.0758665   | 1.05352 |
| SLTM          | 0.0363391   | 1.05342 |
| OXR1          | 0.0318853   | 1.05327 |
| KCNN1         | 0.0734885   | 1.05323 |
| MIST1         | 0.0575795   | 1.05313 |
| B3GALNT2      | 0.072001    | 1.05306 |
| SRPRB         | 0.0409259   | 1.05304 |
| 9330177P18RIK | 0.0558781   | 1.05296 |
| NCOR1         | 0.0267168   | 1.05278 |

|               |             |         |
|---------------|-------------|---------|
| ARL10C        | 0.0358503   | 1.0527  |
| CREBBP        | 0.0606916   | 1.05265 |
| NXF1          | 0.0447015   | 1.05252 |
| LOC386144     | 0.0552565   | 1.05211 |
| C130067A03RIK | 0.0483025   | 1.05177 |
| A430023D23RIK | 0.00896896  | 1.0517  |
| 6430548O12RIK | 0.0636226   | 1.0515  |
| 4931403I22RIK | 0.00562659  | 1.05142 |
| A330084H10RIK | 0.00135936  | 1.05137 |
| TMEM57        | 0.0288484   | 1.05125 |
| CDC14B        | 0.055966    | 1.05088 |
| RAB40C        | 0.0568365   | 1.05077 |
| A530025E09RIK | 0.0227938   | 1.05071 |
| ZFP180        | 0.00726798  | 1.05055 |
| GOLGA4        | 0.0341208   | 1.05054 |
| 2610319H10RIK | 0.0750431   | 1.05047 |
| BHLHB8        | 0.0773172   | 1.05043 |
| 1110001C20RIK | 0.0554894   | 1.05019 |
| CHK           | 0.017706    | 1.05016 |
| USP16         | 0.0543123   | 1.04964 |
| RAB5B         | 0.00669928  | 1.04953 |
| XPO6          | 0.0399919   | 1.0494  |
| TPD52L2       | 0.000788565 | 1.04934 |
| DIS3          | 0.0435882   | 1.04905 |
| A730086L23RIK | 0.000937123 | 1.04903 |
| UQCRB         | 0.0490721   | 1.04898 |
| 4833444G19RIK | 0.0285489   | 1.04895 |
| BC016608      | 0.0641053   | 1.04894 |
| 2610207I05RIK | 0.00538366  | 1.04892 |
| ARFGAP3       | 0.0222861   | 1.04887 |
| ZRANB3        | 0.0737259   | 1.04828 |
| PIAS1         | 0.0393118   | 1.0482  |
| CWF19L2       | 0.00351195  | 1.04798 |
| LOC219106     | 0.0371972   | 1.04795 |
| XPNPEP3       | 0.0435422   | 1.0478  |
| STK40         | 0.0313008   | 1.04779 |
| E030003O11RIK | 0.00877331  | 1.0477  |
| SWAP70        | 0.0704615   | 1.04758 |
| 5830431A10RIK | 0.0337864   | 1.0475  |
| PLEKHA3       | 0.012946    | 1.04745 |
| RWDD4A        | 0.00811141  | 1.04738 |
| AMMECR1L      | 0.0689945   | 1.04706 |
| ARCN1         | 0.067398    | 1.04694 |
| D130060C09RIK | 0.0148913   | 1.04685 |
| C030046E11RIK | 0.0616207   | 1.04673 |
| A930019L04RIK | 0.00181864  | 1.04642 |
| C130040J09RIK | 0.0247894   | 1.04636 |
| LOC100047762  | 0.0386644   | 1.04632 |
| ZFX           | 0.0216443   | 1.04625 |
| D030069G17RIK | 0.0389515   | 1.04614 |
| SEMA3C        | 0.033918    | 1.04593 |
| TARS          | 0.0144493   | 1.04587 |
| GIGYF1        | 0.059949    | 1.04582 |
| STARD3NL      | 0.0269799   | 1.04581 |
| 1110007L15RIK | 0.0527111   | 1.04579 |
| GTF2E1        | 0.0587876   | 1.04578 |
| NRF1          | 0.0323685   | 1.04564 |
| USP36         | 0.000324605 | 1.04558 |

|               |             |         |
|---------------|-------------|---------|
| SOS2          | 0.0709155   | 1.04556 |
| 5430440L12RIK | 0.0451831   | 1.0454  |
| A530024C08RIK | 0.0513409   | 1.04529 |
| DNAJC1        | 0.044571    | 1.04518 |
| NAT12         | 0.0621189   | 1.04517 |
| SBF1          | 0.0334752   | 1.04497 |
| HEG1          | 0.024587    | 1.04492 |
| ERN1          | 0.05001     | 1.04464 |
| PRKX          | 0.0496579   | 1.04457 |
| LOC382128     | 0.0566627   | 1.04413 |
| IBTK          | 0.0718751   | 1.04343 |
| UBE2D3        | 0.0768009   | 1.04338 |
| LOC233771     | 0.047641    | 1.04332 |
| ZBTB38        | 0.00591782  | 1.04275 |
| ZFP143        | 0.053251    | 1.0425  |
| A430087B05RIK | 0.0348918   | 1.04248 |
| FARSA         | 0.0357447   | 1.0423  |
| ZFP318        | 0.0407883   | 1.0422  |
| D630041L13RIK | 0.0699446   | 1.0422  |
| FOXP1         | 0.0065887   | 1.04187 |
| VMN2R-PS14    | 0.0530873   | 1.04185 |
| PCYT1A        | 0.0154448   | 1.04169 |
| B430305P08RIK | 0.0013163   | 1.04143 |
| LTV1          | 0.0532955   | 1.04063 |
| ZUBR1         | 0.0133611   | 1.0406  |
| LOC386270     | 0.00299238  | 1.04052 |
| H13           | 0.0342683   | 1.04043 |
| C87860        | 0.0375579   | 1.04042 |
| VHL           | 0.0786351   | 1.04018 |
| ZFP655        | 0.0579708   | 1.03994 |
| TMEM23        | 0.0155357   | 1.03992 |
| CSNK1G3       | 0.000183637 | 1.03991 |
| BRPF1         | 0.0725568   | 1.03989 |
| POGK          | 0.0346007   | 1.03976 |
| D630040I23RIK | 0.0478692   | 1.03971 |
| STK39         | 0.0567904   | 1.03971 |
| BC038156      | 0.0168926   | 1.03966 |
| A230067E15RIK | 0.0560517   | 1.03949 |
| FERT2         | 0.0656079   | 1.03945 |
| KCMF1         | 0.0719232   | 1.03943 |
| GNL2          | 0.00931313  | 1.03939 |
| 9630015D15RIK | 0.052709    | 1.03933 |
| MAP2K1        | 0.0497732   | 1.03927 |
| 4832404P21RIK | 0.00313548  | 1.03921 |
| D430007A19RIK | 0.0190039   | 1.03918 |
| AFF4          | 0.0445214   | 1.03909 |
| E130016E03RIK | 0.0306483   | 1.03908 |
| 1600021P15RIK | 0.000885614 | 1.03907 |
| 1700109H08RIK | 0.0049231   | 1.03905 |
| 5730455O13RIK | 0.0772817   | 1.03887 |
| 4921505C17RIK | 0.00343175  | 1.03883 |
| N6AMT1        | 0.0440464   | 1.03881 |
| TXNRD3        | 0.0307985   | 1.03867 |
| A730004F22RIK | 0.00489134  | 1.03864 |
| B930046C15RIK | 0.0449461   | 1.03861 |
| ZSWIM1        | 0.0318779   | 1.03853 |
| MYST4         | 0.071996    | 1.03829 |
| 9830169C09RIK | 0.0650264   | 1.03828 |

|               |             |         |
|---------------|-------------|---------|
| SEC61A        | 0.0351235   | 1.0379  |
| D030034I04RIK | 0.0451531   | 1.03788 |
| D330011G23RIK | 0.0110172   | 1.03787 |
| CPEB2         | 0.0103482   | 1.03776 |
| MORC3         | 0.00248511  | 1.03763 |
| RALGPS1       | 0.0834656   | 1.0376  |
| ZMAT3         | 0.0409881   | 1.03753 |
| EHBP1L1       | 0.0387732   | 1.03739 |
| CSE1L         | 0.00181102  | 1.03737 |
| MAPK1IP1      | 0.0099415   | 1.03733 |
| E130216C05RIK | 0.0452743   | 1.03722 |
| 2310045K21RIK | 0.0210109   | 1.03717 |
| A330017A19RIK | 0.0226348   | 1.03696 |
| B230345P09RIK | 0.0768838   | 1.03684 |
| IL6RA         | 0.0376357   | 1.03674 |
| MASP2         | 0.0464832   | 1.03651 |
| 2010203O07RIK | 0.058147    | 1.03651 |
| SRFBP1        | 0.0311329   | 1.0365  |
| RAI1          | 0.0127066   | 1.03646 |
| C230009C22RIK | 0.0194253   | 1.03636 |
| LOC240672     | 0.0827984   | 1.03634 |
| C230064E07RIK | 0.0502024   | 1.0363  |
| 6030458C11RIK | 0.00223868  | 1.03629 |
| MARK3         | 0.0554764   | 1.03624 |
| FBXO42        | 0.0172887   | 1.03621 |
| 3632431M01RIK | 0.00223541  | 1.03613 |
| 9330171D12RIK | 0.0433417   | 1.03604 |
| SLC25A16      | 0.0117659   | 1.03595 |
| ERGIC2        | 0.0663396   | 1.03586 |
| 5530401J07RIK | 0.034997    | 1.0358  |
| MOSPD1        | 0.081935    | 1.03568 |
| NARG1L        | 0.00182543  | 1.03566 |
| E030040L08RIK | 0.0409582   | 1.03558 |
| MADH1         | 0.0775623   | 1.03558 |
| RBM26         | 0.014438    | 1.03556 |
| A830006J06RIK | 0.000786775 | 1.03537 |
| IKZF5         | 0.0486748   | 1.03532 |
| RPP38         | 0.0485561   | 1.03531 |
| ALKBH         | 0.0658259   | 1.03521 |
| AI551093      | 0.0359483   | 1.0352  |
| 1810073N04RIK | 0.0533558   | 1.0352  |
| EIF4ENIF1     | 0.0823625   | 1.03508 |
| ING2          | 0.0185592   | 1.03499 |
| 5730564L20RIK | 0.0270008   | 1.03499 |
| 2810405J23RIK | 0.036068    | 1.03499 |
| DDX3Y         | 0.0444172   | 1.03498 |
| PRMT5         | 0.0129732   | 1.03495 |
| THSD4         | 0.0446834   | 1.03481 |
| DYSF          | 0.00258272  | 1.03472 |
| SKI           | 0.0351318   | 1.03442 |
| D230020C06RIK | 0.046518    | 1.03439 |
| D130059P03RIK | 0.046096    | 1.0343  |
| 8030474H12RIK | 0.0451872   | 1.03408 |
| USP1          | 0.0374506   | 1.034   |
| 4933417E08RIK | 0.0830951   | 1.03399 |
| EIF2C2        | 0.0627086   | 1.03394 |
| NRIP2         | 0.0566495   | 1.03391 |
| D430035B07RIK | 0.00876015  | 1.03387 |

|               |            |         |
|---------------|------------|---------|
| 3230401L03RIK | 0.0726835  | 1.03371 |
| 3110038B19RIK | 0.0259348  | 1.03357 |
| ZC3H13        | 0.0356374  | 1.0333  |
| 2310032M22RIK | 0.0345063  | 1.03329 |
| ZFP91-CNTF    | 0.0231234  | 1.03327 |
| SLC31A1       | 0.051535   | 1.03327 |
| 9130215G10RIK | 0.0479315  | 1.03324 |
| MAGOH         | 0.0350338  | 1.03312 |
| 2210417D09RIK | 0.0128371  | 1.03308 |
| C030048B08RIK | 0.0174142  | 1.03287 |
| SMURF1        | 0.0476468  | 1.03264 |
| LOC100045040  | 0.0680264  | 1.03261 |
| RARRES1       | 0.0328031  | 1.0326  |
| 4432404P07RIK | 0.00297719 | 1.03257 |
| GPLD1         | 0.0849321  | 1.03256 |
| CUL5          | 0.0222698  | 1.03244 |
| 4733401O04RIK | 0.0526338  | 1.03237 |
| WHSC1         | 0.0298223  | 1.03219 |
| TAF1A         | 0.0510136  | 1.03214 |
| LOC386199     | 0.0560143  | 1.03213 |
| G0S2          | 0.00969458 | 1.03204 |
| LOC624198     | 0.0132218  | 1.03156 |
| 6030419I20RIK | 0.0408862  | 1.03153 |
| ICK           | 0.0496261  | 1.03148 |
| PRPF8         | 0.0637097  | 1.03146 |
| RASD2         | 0.0419723  | 1.03139 |
| OGFRL1        | 0.0231435  | 1.03138 |
| FUBP1         | 0.0306875  | 1.03133 |
| A530021E08RIK | 0.0459492  | 1.03131 |
| ADRBK2        | 0.0658923  | 1.0313  |
| PUM2          | 0.0284171  | 1.03125 |
| KANK1         | 0.0133565  | 1.03119 |
| UBFD1         | 0.0766715  | 1.0309  |
| E530004K11RIK | 0.0060592  | 1.03085 |
| NARG1         | 0.0272428  | 1.03079 |
| 9130416J18RIK | 0.0270334  | 1.03078 |
| ELAC1         | 0.0284949  | 1.03063 |
| E130112J05RIK | 0.0187418  | 1.0304  |
| 8430415N23RIK | 0.055509   | 1.03036 |
| GDAP10        | 0.0216499  | 1.03034 |
| ATF2          | 0.0561052  | 1.03033 |
| TRMT2A        | 0.034538   | 1.03024 |
| NSUN2         | 0.0615544  | 1.03022 |
| D7ERTD413E    | 0.0255057  | 1.0301  |
| MAPK8         | 0.0346151  | 1.03009 |
| 4930402E16RIK | 0.0304574  | 1.02996 |
| B230380D07RIK | 0.0551239  | 1.0299  |
| NECAP1        | 0.0429851  | 1.02988 |
| C230066H01RIK | 0.0120474  | 1.02983 |
| PIAS4         | 0.0747519  | 1.02966 |
| SPRR1A        | 0.046188   | 1.0295  |
| PDXDC1        | 0.058757   | 1.02925 |
| D830050E09RIK | 0.0815636  | 1.02912 |
| C030034J23RIK | 0.0311329  | 1.02851 |
| VBP1          | 0.0477297  | 1.02843 |
| UBR2          | 0.0599329  | 1.02843 |
| C430045L21RIK | 0.0304945  | 1.02841 |
| RAB22A        | 0.041827   | 1.0284  |



|               |             |         |
|---------------|-------------|---------|
| RRN3          | 0.0239163   | 1.02836 |
| 6030434H13RIK | 0.0126445   | 1.02833 |
| 4932441K18RIK | 0.00707956  | 1.02818 |
| CDK8          | 0.0432287   | 1.02814 |
| 5830418G11RIK | 0.0621709   | 1.02808 |
| CHERP         | 0.0129765   | 1.02799 |
| COQ5          | 0.0131071   | 1.02798 |
| ZFP770        | 0.0660223   | 1.02793 |
| RAB7          | 0.0284928   | 1.02789 |
| CD3EAP        | 0.0393296   | 1.02777 |
| TRB           | 0.00435373  | 1.02762 |
| ZFP91         | 0.0288366   | 1.02759 |
| MARCH6        | 0.0824744   | 1.02758 |
| WHDC1         | 0.00551647  | 1.02755 |
| CYLD          | 0.0724443   | 1.02752 |
| B130008D24RIK | 0.0466695   | 1.02749 |
| 9630009A08RIK | 0.0278855   | 1.02707 |
| BDNF          | 0.00171452  | 1.02705 |
| 5730403B10RIK | 0.0197516   | 1.02687 |
| ZBTB39        | 0.00488301  | 1.02684 |
| PLCXD1        | 0.019326    | 1.02681 |
| SPAG9         | 0.0391539   | 1.02664 |
| ANXA11        | 0.074733    | 1.02651 |
| VPS18         | 0.0111112   | 1.02649 |
| 2610015J01RIK | 0.0328914   | 1.02648 |
| 2410042D21RIK | 0.0439135   | 1.02648 |
| LOC381243     | 0.0482481   | 1.02643 |
| 5330435L01RIK | 0.0487007   | 1.0264  |
| 1810007M14RIK | 0.030571    | 1.02639 |
| TASP1         | 0.0274129   | 1.02637 |
| TOP3B         | 0.0540368   | 1.02634 |
| PLEKHM1       | 0.0237698   | 1.02632 |
| MOBK1B        | 0.0726419   | 1.02622 |
| A630036P20RIK | 0.0138496   | 1.0261  |
| A430089I07RIK | 0.00494493  | 1.02602 |
| GALNT11       | 0.0344969   | 1.026   |
| PTRH2         | 0.0309781   | 1.02599 |
| NPHP3         | 0.0338131   | 1.02593 |
| A430083I17RIK | 0.0790942   | 1.02579 |
| KITL          | 0.0210403   | 1.02578 |
| LOC100048020  | 0.027238    | 1.02577 |
| FBXO30        | 0.0122246   | 1.02575 |
| 4732471D19RIK | 0.0367326   | 1.02566 |
| NPTX2         | 0.0183101   | 1.02556 |
| TPP2          | 0.0258527   | 1.02553 |
| 2700024H10RIK | 0.0362638   | 1.02545 |
| ZFP322A       | 0.0355278   | 1.0254  |
| 9030605E16RIK | 0.000389755 | 1.02536 |
| ANXA7         | 0.0389979   | 1.02532 |
| A130020K16RIK | 0.00434037  | 1.0253  |
| NMD3          | 0.0579215   | 1.0253  |
| CDKL5         | 0.0157448   | 1.02528 |
| GMPS          | 0.0688657   | 1.02503 |
| 9530062G19RIK | 0.0390291   | 1.02498 |
| ZFP317        | 0.0781367   | 1.02492 |
| D530007E13RIK | 0.0599098   | 1.02485 |
| HOOK3         | 0.0100123   | 1.02475 |
| LOC385959     | 0.0772862   | 1.02463 |

|               |            |         |
|---------------|------------|---------|
| AKAP8         | 0.00883582 | 1.02462 |
| A130053G17RIK | 0.0109287  | 1.02456 |
| C330006P03RIK | 0.0145598  | 1.0245  |
| RC3H2         | 0.0507115  | 1.0245  |
| 4631409F12RIK | 0.00718045 | 1.02447 |
| LOC385019     | 0.0408043  | 1.02442 |
| TBRG4         | 0.0633097  | 1.02441 |
| SCFD1         | 0.0455507  | 1.02425 |
| RBBP4         | 0.0177325  | 1.02411 |
| ACOT5         | 0.0522969  | 1.02404 |
| ZFP445        | 0.0372643  | 1.02402 |
| TRIM56        | 0.0257979  | 1.02388 |
| D930014N22RIK | 0.0130101  | 1.02377 |
| 7030401E22RIK | 0.0321246  | 1.02377 |
| B230312I18RIK | 0.0196652  | 1.02364 |
| PSG23         | 0.0585064  | 1.02361 |
| C230091E20RIK | 0.0129345  | 1.0236  |
| 6720406L13RIK | 0.0317164  | 1.02359 |
| 3110023B02RIK | 0.0545185  | 1.02349 |
| C130072A16RIK | 0.030762   | 1.02334 |
| A330049H05RIK | 0.0206633  | 1.02309 |
| GPR23         | 0.0210981  | 1.02304 |
| 4930518I15RIK | 0.0609838  | 1.02281 |
| D630048P19RIK | 0.0429733  | 1.02278 |
| RNMT          | 0.0788181  | 1.02278 |
| LOC547150     | 0.0478574  | 1.02277 |
| AA408296      | 0.0631656  | 1.02269 |
| ZBTB43        | 0.0825729  | 1.0225  |
| USP42         | 0.00844412 | 1.02249 |
| LLPH          | 0.0303291  | 1.02244 |
| C630029M13RIK | 0.00229764 | 1.02238 |
| CEP57         | 0.0472976  | 1.02238 |
| SH3GL1        | 0.0643029  | 1.02233 |
| LOC386179     | 0.0206896  | 1.02231 |
| LOC227393     | 0.0812895  | 1.02228 |
| DDX46         | 0.0336371  | 1.02226 |
| E4F1          | 0.0496532  | 1.02223 |
| 5930437C20RIK | 0.0812568  | 1.02201 |
| SUHW4         | 0.0560656  | 1.02198 |
| GM1815        | 0.0478444  | 1.02195 |
| ABCC1A        | 0.0478841  | 1.02193 |
| C230081A13RIK | 0.0414853  | 1.02188 |
| LOC277385     | 0.0607574  | 1.02181 |
| DICER1        | 0.0457071  | 1.02173 |
| B130017I01RIK | 0.0733693  | 1.02172 |
| CUEDC1        | 0.0423334  | 1.02165 |
| SSR1          | 0.0165322  | 1.02164 |
| SKZ1-PENDING  | 0.0115851  | 1.02159 |
| PKNOX1        | 0.0137748  | 1.02159 |
| 9930013M16RIK | 0.0246169  | 1.02158 |
| LOC100046963  | 0.0813164  | 1.02154 |
| A630020I15RIK | 0.0389729  | 1.02147 |
| 6330400D04    | 0.0749409  | 1.02143 |
| 1200003I07RIK | 0.0647951  | 1.02139 |
| CACNA2D1      | 0.0732181  | 1.02134 |
| NARS2         | 0.0406144  | 1.02128 |
| CTTNBP2       | 0.00949906 | 1.02119 |
| LSM12         | 0.0322379  | 1.02119 |

|                        |            |         |
|------------------------|------------|---------|
| <b>BRAF</b>            | 0.00531224 | 1.02114 |
| <b>AFG3L2</b>          | 0.0192853  | 1.02113 |
| <b>E130309L16RIK</b>   | 0.0263174  | 1.02112 |
| <b>PIK3CA</b>          | 0.0601536  | 1.02109 |
| <b>RAPGEF5</b>         | 0.00695914 | 1.02105 |
| <b>SNX27</b>           | 0.0810337  | 1.02097 |
| <b>D430021P20RIK</b>   | 0.00216232 | 1.02091 |
| <b>SNIP1</b>           | 0.0483343  | 1.02091 |
| <b>D130004H04RIK</b>   | 0.0805811  | 1.02091 |
| <b>5730470C09RIK</b>   | 0.021538   | 1.02085 |
| <b>SENP1</b>           | 0.0428873  | 1.02075 |
| <b>BC021438</b>        | 0.0239862  | 1.02069 |
| <b>REV1</b>            | 0.00583549 | 1.02067 |
| <b>OVGP1</b>           | 0.0235316  | 1.02064 |
| <b>RASA2</b>           | 0.0385461  | 1.0206  |
| <b>TM9SF2</b>          | 0.0471081  | 1.02054 |
| <b>TRRP4AP-PENDING</b> | 0.028588   | 1.02052 |
| <b>ATPI</b>            | 0.0221453  | 1.02049 |
| <b>IFRD2</b>           | 0.0302283  | 1.02047 |
| <b>YIPF6</b>           | 0.0193652  | 1.02041 |
| <b>TRPV4</b>           | 0.0611553  | 1.02041 |
| <b>9530031H08RIK</b>   | 0.060483   | 1.02037 |
| <b>CDC25A</b>          | 0.0308489  | 1.02031 |
| <b>YTHDF3</b>          | 0.0559852  | 1.02001 |
| <b>A930039H18RIK</b>   | 0.0496205  | 1.02    |
| <b>METTL6</b>          | 0.0713244  | 1.01999 |
| <b>A130019H11RIK</b>   | 0.0317517  | 1.01996 |
| <b>E330020K23RIK</b>   | 0.0640867  | 1.01995 |
| <b>ZFML</b>            | 0.0125969  | 1.01992 |
| <b>D030040K20RIK</b>   | 0.0664586  | 1.0199  |
| <b>SLC25A4</b>         | 0.0394147  | 1.01988 |
| <b>B930037B01RIK</b>   | 0.0107999  | 1.01974 |
| <b>PHRF1</b>           | 0.0573099  | 1.01968 |
| <b>D430019K11RIK</b>   | 0.0354606  | 1.0196  |
| <b>A230067G21RIK</b>   | 0.0198252  | 1.01958 |
| <b>1500019C06RIK</b>   | 0.00571871 | 1.01954 |
| <b>PTEN</b>            | 0.0578439  | 1.01945 |
| <b>ABCF3</b>           | 0.00351509 | 1.01944 |
| <b>TERF2IP</b>         | 0.03854    | 1.01936 |
| <b>TNRC6B</b>          | 0.0450809  | 1.01928 |
| <b>CCDC155</b>         | 0.0554619  | 1.01927 |
| <b>2810455B08RIK</b>   | 0.0132637  | 1.01925 |
| <b>D030070I18RIK</b>   | 0.0142466  | 1.01924 |
| <b>B430109P06RIK</b>   | 0.00618526 | 1.01923 |
| <b>LOC100041103</b>    | 0.0650487  | 1.01921 |
| <b>A430090L17RIK</b>   | 0.0735139  | 1.01911 |
| <b>ZFP106</b>          | 0.0275739  | 1.01904 |
| <b>PRPF40A</b>         | 0.00787931 | 1.01895 |
| <b>B9D2</b>            | 0.0140384  | 1.0189  |
| <b>JMJD2C</b>          | 0.0171392  | 1.01888 |
| <b>WARS2</b>           | 0.0143238  | 1.01875 |
| <b>C430015M08RIK</b>   | 0.0153143  | 1.01874 |
| <b>TFB1M</b>           | 0.0747347  | 1.01874 |
| <b>TGS1</b>            | 0.0108762  | 1.01871 |
| <b>3930402G23RIK</b>   | 0.0777469  | 1.01864 |
| <b>A530030B07RIK</b>   | 0.0362753  | 1.01863 |
| <b>ZFP516</b>          | 0.0666623  | 1.01863 |
| <b>EG434077</b>        | 0.0785642  | 1.01862 |

|               |             |         |
|---------------|-------------|---------|
| PI4K2B        | 0.0104906   | 1.01854 |
| SLC30A4       | 0.00353749  | 1.01852 |
| ZFP800        | 0.00139589  | 1.01852 |
| PHF14         | 0.0356219   | 1.01852 |
| PVRL3         | 0.0561438   | 1.01852 |
| D930049D10RIK | 0.0116521   | 1.01848 |
| 2010305A19RIK | 0.00135759  | 1.01846 |
| BC024659      | 0.0389993   | 1.01836 |
| 9330174H21RIK | 0.0325069   | 1.01831 |
| ABCE1         | 0.0034702   | 1.01828 |
| B930097J01RIK | 0.0389593   | 1.01824 |
| NOL11         | 0.0239269   | 1.01814 |
| PTPDC1        | 0.0431353   | 1.0181  |
| D330018I10RIK | 0.0504566   | 1.01797 |
| 4732418C07RIK | 0.0593117   | 1.01789 |
| 9330158N06RIK | 0.0361994   | 1.01784 |
| IMPDH1        | 0.057804    | 1.01782 |
| 2900045G02RIK | 0.0834124   | 1.01782 |
| 6030410I10RIK | 0.0300881   | 1.01776 |
| TEX10         | 0.0614418   | 1.01776 |
| TMEM16B       | 0.0605924   | 1.01773 |
| 1700009P03RIK | 0.0188606   | 1.01769 |
| ENSA          | 0.00884078  | 1.01764 |
| LOC100048123  | 0.000415473 | 1.01758 |
| ZFP790        | 0.00366899  | 1.01757 |
| ANK2          | 0.0570894   | 1.01755 |
| 2600011C06RIK | 0.0427368   | 1.01752 |
| NFRKB         | 0.0586286   | 1.01752 |
| SPRR2F        | 0.024852    | 1.01748 |
| PARN          | 0.0437173   | 1.01741 |
| RNPC2         | 0.024208    | 1.01738 |
| LOC384344     | 0.0128529   | 1.01734 |
| C130073O12RIK | 0.0382293   | 1.01731 |
| A130076G11RIK | 0.047087    | 1.01731 |
| 2010005J08RIK | 0.00807942  | 1.01726 |
| PLP1          | 0.0375471   | 1.01726 |
| 9130206N08RIK | 0.0136587   | 1.01713 |
| EEG1-PENDING  | 0.00988614  | 1.01712 |
| DYNC1LI1      | 0.0342973   | 1.01712 |
| WWP1          | 0.052597    | 1.01708 |
| FADS3         | 0.0298814   | 1.01707 |
| D230007L07RIK | 0.0770563   | 1.01705 |
| 4732460K03RIK | 0.0378116   | 1.01704 |
| LOC100045679  | 0.0309524   | 1.01689 |
| DHX8          | 0.0507591   | 1.01685 |
| SMCX          | 0.0107197   | 1.01683 |
| A530082C11RIK | 0.0366368   | 1.01682 |
| RIF1          | 0.0220095   | 1.0168  |
| EXTL1         | 0.0742154   | 1.01673 |
| LOC100043402  | 0.0322624   | 1.01669 |
| HSPA4         | 0.055064    | 1.01667 |
| 5330438F16RIK | 0.0641931   | 1.01666 |
| PNPO          | 0.0142715   | 1.01663 |
| 9230112E08RIK | 0.0744083   | 1.01662 |
| C130090G16RIK | 0.0283366   | 1.0166  |
| RECQL4        | 0.0585087   | 1.01655 |
| CNPY3         | 0.0365435   | 1.01654 |
| ZFP553        | 0.00747907  | 1.01653 |

|               |             |         |
|---------------|-------------|---------|
| E130112N23RIK | 0.0489578   | 1.01653 |
| A130027D22RIK | 0.0497598   | 1.01647 |
| LOC234374     | 0.0705556   | 1.01642 |
| UTP14A        | 0.0192992   | 1.01639 |
| A430071O12RIK | 0.0612354   | 1.01639 |
| C130039O16RIK | 0.0253972   | 1.01636 |
| HMG20A        | 0.036259    | 1.0163  |
| A630075K04RIK | 0.0337112   | 1.01627 |
| OTUB2         | 0.0754048   | 1.01623 |
| 2010007L18RIK | 0.0122847   | 1.01621 |
| E330019D12RIK | 0.0591092   | 1.01608 |
| LOC386081     | 0.063856    | 1.01606 |
| LOC100046905  | 0.0459095   | 1.01597 |
| OTUD3         | 0.0358645   | 1.01593 |
| C920016N10RIK | 0.0318113   | 1.01589 |
| ARRB1         | 0.0578322   | 1.01583 |
| SYCE2         | 0.071342    | 1.01576 |
| ARFGAP1       | 0.00441882  | 1.01564 |
| RCN3          | 0.0730752   | 1.01563 |
| 0610011I19RIK | 0.0685689   | 1.01562 |
| IFNGR2        | 0.0338799   | 1.01555 |
| 5730419I09RIK | 0.0821827   | 1.01555 |
| GNMT          | 0.00381814  | 1.0154  |
| 2610027L16RIK | 0.00044252  | 1.01522 |
| PPM1L         | 0.0122024   | 1.01521 |
| 4932441P04RIK | 0.0476648   | 1.0152  |
| CTH           | 0.0509882   | 1.01509 |
| B430114K07RIK | 0.00593319  | 1.01504 |
| 2610301F02RIK | 0.0510301   | 1.01499 |
| SDCCAG1       | 0.0788404   | 1.01499 |
| B230337C21RIK | 0.0126379   | 1.01489 |
| B130044D17RIK | 0.0267252   | 1.01484 |
| DLD           | 0.0708449   | 1.01484 |
| E530018O14RIK | 0.0621385   | 1.0148  |
| C630002L24RIK | 0.0343689   | 1.01478 |
| 1700064E03RIK | 0.0140482   | 1.01476 |
| E330013M12RIK | 0.0397127   | 1.01471 |
| MED1          | 0.0529711   | 1.0147  |
| 9530018I07RIK | 0.0610576   | 1.0147  |
| C630011I23    | 0.0308038   | 1.01468 |
| C430014M02RIK | 0.0240155   | 1.01465 |
| LOC100047009  | 0.0341913   | 1.01461 |
| D930046H04RIK | 0.060246    | 1.01461 |
| ARF4          | 0.0330002   | 1.01459 |
| RASSF4        | 0.0252276   | 1.01449 |
| LOC381336     | 0.034537    | 1.01445 |
| PRPF4         | 0.000648491 | 1.01444 |
| GOPC          | 0.0149719   | 1.01443 |
| 4933411D12RIK | 0.0721192   | 1.0144  |
| 6030439I24RIK | 0.0340264   | 1.01439 |
| 9830118G07RIK | 0.0747277   | 1.01434 |
| GLT1D1        | 0.0781029   | 1.01424 |
| RBBP6         | 0.0272242   | 1.01421 |
| LOC626061     | 0.0382177   | 1.01415 |
| BC031575      | 0.0289957   | 1.0141  |
| 6820437F20RIK | 0.0157764   | 1.01407 |
| USP48         | 0.049561    | 1.01404 |
| FBXW2         | 0.0240901   | 1.014   |

|                |             |         |
|----------------|-------------|---------|
| ADSS2          | 0.0614792   | 1.014   |
| 9630044E13RIK  | 0.0181928   | 1.0139  |
| C230094A19RIK  | 0.0204333   | 1.0139  |
| 9430043O10RIK  | 0.031615    | 1.01389 |
| 9530071H01RIK  | 0.00527525  | 1.01385 |
| CYP20A1        | 0.000628452 | 1.01384 |
| LOC381747      | 0.0411877   | 1.01384 |
| EPB4.1         | 0.0104852   | 1.01378 |
| CPEB4          | 0.00327353  | 1.01373 |
| PTPRZ1         | 0.0166678   | 1.0137  |
| LOC668047      | 0.069967    | 1.0137  |
| 2210010L05RIK  | 0.0147756   | 1.01365 |
| A130099L09RIK  | 0.0202122   | 1.01364 |
| TTC23          | 0.0212627   | 1.01358 |
| PCNX           | 0.0190994   | 1.01356 |
| OCRL           | 0.0137636   | 1.01355 |
| ALG11          | 0.00679904  | 1.01354 |
| 1810008K04RIK  | 0.00485612  | 1.0135  |
| D930026K06RIK  | 0.0529946   | 1.01349 |
| B130039D17RIK  | 0.00261973  | 1.01346 |
| D430007J11RIK  | 0.0516341   | 1.01341 |
| BIRC6          | 0.0438821   | 1.0134  |
| E130202F10RIK  | 0.016001    | 1.01335 |
| 1700040A22RIK  | 0.0413734   | 1.01335 |
| 2310047C21RIK  | 0.0730347   | 1.01335 |
| C030046K23RIK  | 0.065616    | 1.01334 |
| BC010584       | 0.0449438   | 1.01322 |
| 5730543M03RIK  | 0.0165277   | 1.01319 |
| SCL000168.1_25 | 0.0600956   | 1.01317 |
| KPNA3          | 0.0694361   | 1.01314 |
| 9430068D24RIK  | 0.0351358   | 1.01313 |
| RPN1           | 0.00444598  | 1.0131  |
| 5730410E15RIK  | 0.0608519   | 1.01308 |
| A730082L10RIK  | 0.051055    | 1.01305 |
| C130072C03RIK  | 0.019688    | 1.01303 |
| IRGQ           | 0.0130312   | 1.01296 |
| A630024K09RIK  | 0.0356007   | 1.01286 |
| FOXN2          | 0.00203542  | 1.01284 |
| SP3            | 0.0251412   | 1.01284 |
| LOC636687      | 0.024621    | 1.01283 |
| PCDH7          | 0.0186217   | 1.01273 |
| RAN            | 0.0657602   | 1.01271 |
| GABPB1         | 0.030674    | 1.01267 |
| SNX7           | 0.0155193   | 1.01254 |
| B130018P07RIK  | 0.00153927  | 1.01249 |
| EG226654       | 0.0339463   | 1.01248 |
| MGA            | 0.0108013   | 1.01239 |
| NUDEL-PENDING  | 0.021905    | 1.01234 |
| D330016G23RIK  | 0.0322443   | 1.01229 |
| GTL7           | 0.0200671   | 1.01228 |
| SLC38A10       | 0.0558161   | 1.01228 |
| KCNN4          | 0.00163057  | 1.01226 |
| GCC2           | 0.0163786   | 1.01222 |
| SLU7           | 0.060887    | 1.01219 |
| C130071E11RIK  | 0.0131642   | 1.01218 |
| C130060B01RIK  | 0.0340107   | 1.01215 |
| TBC1D2         | 0.0536754   | 1.01215 |
| HCFC2          | 0.08275     | 1.01214 |

|                 |             |         |
|-----------------|-------------|---------|
| D230019K20RIK   | 0.0278037   | 1.01208 |
| SPRED2          | 0.0472716   | 1.01204 |
| ZFH4            | 0.0336252   | 1.01203 |
| 4833441J24RIK   | 0.009669    | 1.01202 |
| 6030408C04RIK   | 0.0690266   | 1.012   |
| VPS39           | 0.0807279   | 1.012   |
| LOC381105       | 0.0233733   | 1.0119  |
| LOC381151       | 0.0791336   | 1.01187 |
| D430036M17RIK   | 0.042455    | 1.01183 |
| A530092L01RIK   | 0.0328876   | 1.01177 |
| STX3            | 0.0419809   | 1.01176 |
| STAG1           | 0.0573785   | 1.01173 |
| AI447711        | 0.0580281   | 1.01164 |
| 2900058M19RIK   | 0.0563903   | 1.01162 |
| 5730408I11RIK   | 0.033962    | 1.01161 |
| D030022P06RIK   | 0.0388432   | 1.01156 |
| 0610030E20RIK   | 0.000170046 | 1.01155 |
| ASTE1           | 0.0611768   | 1.01149 |
| TRAF5           | 0.0178716   | 1.01147 |
| 1200009F10RIK   | 0.0789761   | 1.01144 |
| 2210015D19RIK   | 0.0789024   | 1.01137 |
| CTNND2          | 0.0721662   | 1.01135 |
| RNF219          | 0.018929    | 1.01131 |
| LOC624784       | 0.00513373  | 1.01125 |
| A330068P14RIK   | 0.0615363   | 1.01116 |
| 2810409M01RIK   | 0.0697388   | 1.01116 |
| TIPIN           | 0.00133987  | 1.01112 |
| TAGAP1          | 0.0301784   | 1.01112 |
| C130020O07RIK   | 0.0291369   | 1.01109 |
| GTF3C4          | 0.0119399   | 1.01103 |
| RNF121          | 0.0562547   | 1.01094 |
| 6430407D20RIK   | 0.034877    | 1.01091 |
| MBIP            | 0.0793964   | 1.01091 |
| 1810020C02RIK   | 0.0715178   | 1.01089 |
| D430024I10RIK   | 0.0318659   | 1.01082 |
| D130067N01RIK   | 0.0453786   | 1.0108  |
| 4832410F06RIK   | 0.0410661   | 1.01077 |
| ZYG11B          | 0.077687    | 1.01076 |
| LARP2           | 0.0216182   | 1.01074 |
| SCL0001923.1_57 | 0.0265131   | 1.01069 |
| BTBD3           | 0.0735594   | 1.01068 |
| E330009F12RIK   | 0.0372664   | 1.01065 |
| 4932438A13RIK   | 0.0473671   | 1.01063 |
| TDP1            | 0.0450169   | 1.01062 |
| 2310047B19RIK   | 0.0816645   | 1.01061 |
| 1700001J03RIK   | 0.00997392  | 1.01059 |
| C330016F22RIK   | 0.015073    | 1.01057 |
| TWISTNB         | 0.0628933   | 1.0105  |
| CCDC98          | 0.0508384   | 1.01049 |
| 6430544C07RIK   | 0.0590456   | 1.01049 |
| MAD             | 0.076803    | 1.01049 |
| ENPP4           | 0.0134369   | 1.01048 |
| A430043M19RIK   | 0.0255754   | 1.01047 |
| DCUN1D3         | 0.0535564   | 1.01046 |
| D430003P20RIK   | 0.0693993   | 1.01046 |
| C230055K05RIK   | 0.0126059   | 1.01045 |
| 4732431J01RIK   | 0.0151849   | 1.01039 |
| 4930438O05RIK   | 0.0704534   | 1.01039 |

|                |             |         |
|----------------|-------------|---------|
| SPC24          | 0.031755    | 1.01037 |
| LOC380753      | 0.0114541   | 1.01034 |
| D330027L06RIK  | 0.0449861   | 1.01033 |
| EDC4           | 0.0814037   | 1.01033 |
| 9630009L01RIK  | 0.0638693   | 1.01031 |
| ZFP593         | 0.00615701  | 1.01027 |
| LOC384065      | 0.00971614  | 1.01023 |
| TXNDC11        | 0.0268672   | 1.01017 |
| BC014805       | 0.0437354   | 1.01017 |
| 2900075B16RIK  | 0.0101867   | 1.01016 |
| MKLN1          | 0.0457476   | 1.01014 |
| B230216G23RIK  | 0.0507838   | 1.01011 |
| ZZEF1          | 0.00965584  | 1.01009 |
| A630008E13RIK  | 0.000631635 | 1.01003 |
| 0610007P08RIK  | 0.0154307   | 1.01001 |
| THEM4          | 0.0583301   | 1.00992 |
| A830021G05RIK  | 0.0213123   | 1.00988 |
| A130035O14RIK  | 0.0250187   | 1.00987 |
| A930006A19RIK  | 0.081983    | 1.00978 |
| CTDP1          | 0.0160588   | 1.00975 |
| TNKS           | 0.0434957   | 1.00972 |
| 4833409N03RIK  | 0.0518862   | 1.00972 |
| LOC382050      | 0.07924     | 1.00972 |
| RNF20          | 0.0579921   | 1.0097  |
| NUDCD2         | 0.0643491   | 1.00968 |
| B4GALT7        | 0.0338625   | 1.00967 |
| SRRM1          | 0.0555908   | 1.00965 |
| ORC4L          | 0.0734165   | 1.00965 |
| LOC386168      | 0.0194886   | 1.0096  |
| 2700063P19RIK  | 0.0255443   | 1.00959 |
| SLC4A4         | 0.00898954  | 1.00957 |
| LOC100044862   | 0.0770487   | 1.00947 |
| LIG4           | 0.00638069  | 1.00944 |
| D330038O06RIK  | 0.0329911   | 1.00943 |
| A630042M04RIK  | 0.0728805   | 1.00943 |
| C230048N02RIK  | 0.0748825   | 1.00938 |
| A430106G13RIK  | 0.0825211   | 1.00938 |
| TIPARP         | 0.0315161   | 1.00936 |
| A930015K17RIK  | 0.026982    | 1.00935 |
| 3110023E09RIK  | 0.0594373   | 1.00931 |
| A730062O07RIK  | 0.0625772   | 1.00928 |
| 6030419C18RIK  | 0.0334572   | 1.00925 |
| RNF12          | 0.0259638   | 1.0092  |
| BC016423       | 0.0822131   | 1.0092  |
| HCCS           | 0.0403072   | 1.00919 |
| LOC386298      | 0.050905    | 1.00916 |
| RINT1          | 0.00649261  | 1.00914 |
| A930030D01RIK  | 0.00293358  | 1.0091  |
| 4932441N08RIK  | 0.0227116   | 1.0091  |
| F730023C13RIK  | 0.0466136   | 1.00908 |
| SCL0002312.1_1 | 0.0836941   | 1.00908 |
| A330081F11RIK  | 0.0380831   | 1.00904 |
| D030073C20RIK  | 0.0743426   | 1.00903 |
| XPO4           | 0.0379081   | 1.00902 |
| 4632411B12RIK  | 0.0276272   | 1.009   |
| E330037I15RIK  | 0.0261964   | 1.00898 |
| RAVER2         | 0.0323649   | 1.00897 |
| LOC100040968   | 0.0726725   | 1.00896 |



|                |            |         |
|----------------|------------|---------|
| SPIRE1         | 0.0249011  | 1.00891 |
| D130051G04RIK  | 0.0300017  | 1.00891 |
| ECAC2          | 0.0523275  | 1.00891 |
| KRT42          | 0.00116262 | 1.00886 |
| EHD4           | 0.0172975  | 1.00886 |
| A630007B06RIK  | 0.0331338  | 1.00886 |
| MPHOSPH9       | 0.0700256  | 1.00885 |
| 1700105P06RIK  | 0.0800311  | 1.00883 |
| AI597479       | 0.0817838  | 1.00881 |
| 9530014D17RIK  | 0.0614463  | 1.00877 |
| LOC241593      | 0.0449687  | 1.00864 |
| F730011C10RIK  | 0.0302803  | 1.00862 |
| SNORA69        | 0.0609598  | 1.00855 |
| G430079N04RIK  | 0.01906    | 1.00854 |
| 4632408O18RIK  | 0.0276802  | 1.00854 |
| DCBLD2         | 0.0242933  | 1.00853 |
| 4833441B18RIK  | 0.0411813  | 1.00849 |
| TDPOZ2         | 0.0219501  | 1.00847 |
| B930066N23RIK  | 0.0609131  | 1.00847 |
| NFATC1         | 0.0698867  | 1.00843 |
| 4933407M15RIK  | 0.0200953  | 1.00842 |
| GM336          | 0.0804111  | 1.00842 |
| LOC381890      | 0.0489472  | 1.00838 |
| LOC100048439   | 0.0168844  | 1.00829 |
| PTPRM          | 0.0236428  | 1.00829 |
| A530016E13RIK  | 0.0570836  | 1.00825 |
| PROSC          | 0.0769815  | 1.00824 |
| EEA1           | 0.00174441 | 1.00818 |
| HRB2           | 0.0758658  | 1.00818 |
| ATP8A1         | 0.0340868  | 1.00817 |
| N4BP2          | 0.0649777  | 1.00817 |
| A030001A03RIK  | 0.0099531  | 1.00815 |
| 6430590A07RIK  | 0.0677812  | 1.00814 |
| 5830417I10RIK  | 0.0566788  | 1.00812 |
| LOC242842      | 0.0208439  | 1.00811 |
| TAF5           | 0.0317046  | 1.0081  |
| C730037B14RIK  | 0.0194208  | 1.00807 |
| NSCCN1         | 0.0203968  | 1.00803 |
| CDK7           | 0.0265292  | 1.00802 |
| D330004B08RIK  | 0.0779576  | 1.00802 |
| LOC217591      | 0.0392964  | 1.00801 |
| PDCL           | 0.0200156  | 1.00799 |
| A530095B06RIK  | 0.0791694  | 1.00799 |
| 6030495H03RIK  | 0.0591504  | 1.00796 |
| TERF2          | 0.07092    | 1.00793 |
| 4931406H21RIK  | 0.0609644  | 1.00792 |
| 5830411J07RIK  | 0.00698124 | 1.0079  |
| 9626100_224_RC | 0.00343967 | 1.00788 |
| 3110021A11RIK  | 0.0606699  | 1.00787 |
| LOC100039011   | 0.0311374  | 1.00785 |
| D230032O14RIK  | 0.0148441  | 1.00784 |
| A430103B12RIK  | 0.0388653  | 1.00784 |
| PCDHB15        | 0.0123762  | 1.00782 |
| LDLC           | 0.0316959  | 1.00782 |
| YARS           | 0.0427415  | 1.00781 |
| A630034D18RIK  | 0.0507157  | 1.00779 |
| 2200005K02RIK  | 0.0778254  | 1.00774 |
| A930033H14RIK  | 0.0546111  | 1.00773 |

|               |            |         |
|---------------|------------|---------|
| A630084C02RIK | 0.0211043  | 1.00767 |
| EFNB3         | 0.055074   | 1.00764 |
| A930009M04RIK | 0.00789842 | 1.00762 |
| KRR1          | 0.00413376 | 1.00762 |
| LOC381539     | 0.00317044 | 1.00761 |
| 2310040B03RIK | 0.0420987  | 1.00759 |
| LOC236749     | 0.0398673  | 1.00758 |
| B930074N15RIK | 0.027466   | 1.00757 |
| GORASP1       | 0.0612277  | 1.00757 |
| A730042J05RIK | 0.0682708  | 1.00757 |
| D930022F04RIK | 0.0018738  | 1.00756 |
| 6430403C09RIK | 0.0399237  | 1.00756 |
| F8            | 0.0839939  | 1.00753 |
| D130054H18RIK | 0.0104359  | 1.0075  |
| ZBTB3         | 0.0071152  | 1.00749 |
| 1700012O15RIK | 0.0787792  | 1.00747 |
| A130094J16RIK | 0.029329   | 1.00746 |
| A430109E24RIK | 0.0761551  | 1.00745 |
| SERPINA1A     | 0.0723815  | 1.00743 |
| NHLRC3        | 0.0477616  | 1.00741 |
| C130020P08RIK | 0.0161403  | 1.0074  |
| C230021J06RIK | 0.0319103  | 1.00739 |
| MTDNA_ND6     | 0.0385952  | 1.00739 |
| A930015C19RIK | 0.0200323  | 1.00738 |
| PITPNM3       | 0.0193005  | 1.00736 |
| A930024F09RIK | 0.00130604 | 1.00733 |
| A830026L17RIK | 0.0516391  | 1.00733 |
| D130050K19RIK | 0.0197118  | 1.00732 |
| FBP1          | 0.076245   | 1.0073  |
| PTGDS         | 0.0640467  | 1.00729 |
| KLK10         | 0.0383807  | 1.00728 |
| 2810049C16RIK | 0.0500253  | 1.00728 |
| DOK5          | 0.015454   | 1.00727 |
| C130005N09RIK | 0.0281078  | 1.00725 |
| ZFP184        | 0.0308468  | 1.00716 |
| C530045P18RIK | 0.0357596  | 1.00716 |
| 6720480F11RIK | 0.0588722  | 1.00716 |
| 1500002C15RIK | 0.071321   | 1.00715 |
| B130006D01RIK | 0.0129369  | 1.00713 |
| 9630050A07RIK | 0.0800557  | 1.00712 |
| ATXN7L1       | 0.0687739  | 1.00711 |
| LOC207787     | 0.00194813 | 1.00707 |
| C530043K16RIK | 0.0272073  | 1.00703 |
| 4933437K13RIK | 0.0835296  | 1.00703 |
| BNIP3         | 0.0689372  | 1.00702 |
| COX8B         | 0.0827281  | 1.007   |
| FBXO41        | 0.0212233  | 1.00697 |
| F730028J12RIK | 0.00993164 | 1.00695 |
| D030028A08RIK | 0.0260229  | 1.00695 |
| B230340J04RIK | 0.0303938  | 1.00694 |
| 3110045I18RIK | 0.0823763  | 1.00692 |
| CPSF4         | 5.86E-05   | 1.00691 |
| NT5DC3        | 0.00802862 | 1.00688 |
| D19ERTD737E   | 0.0246457  | 1.00688 |
| C030005D05RIK | 0.0722908  | 1.00687 |
| B930080B11RIK | 0.0321405  | 1.00685 |
| DDX23         | 0.0531302  | 1.00685 |
| D930015M12RIK | 0.0243568  | 1.00684 |

|               |             |         |
|---------------|-------------|---------|
| KCNMA1        | 0.024551    | 1.00684 |
| UBOX5         | 0.0813278   | 1.00682 |
| LOC386256     | 0.0186455   | 1.00681 |
| MIA3          | 0.0244647   | 1.00679 |
| LOC226439     | 0.0149298   | 1.00678 |
| DDX19B        | 0.0535148   | 1.00678 |
| 5730405D16RIK | 0.0321558   | 1.00677 |
| 2310002A08RIK | 0.00957841  | 1.00674 |
| A130028H19RIK | 0.0411291   | 1.00672 |
| ATF6          | 0.00428788  | 1.0067  |
| PRPSAP2       | 0.0122552   | 1.00669 |
| 9430025M13RIK | 0.0283911   | 1.00669 |
| 6446580_669   | 0.0749812   | 1.00666 |
| E330014F24RIK | 0.0507051   | 1.00664 |
| LOC381400     | 0.0398276   | 1.0066  |
| 0710007C18RIK | 0.0317028   | 1.00657 |
| 9330155G14RIK | 0.0427598   | 1.00653 |
| 3230401M21RIK | 0.0500189   | 1.00651 |
| ETL1          | 0.0539874   | 1.00651 |
| BC003993      | 0.0105356   | 1.00645 |
| TRIM60        | 0.0227589   | 1.00645 |
| NEK4          | 0.000654828 | 1.00643 |
| SLC14A1       | 0.00908298  | 1.00643 |
| 1300013B24RIK | 0.0503448   | 1.0064  |
| LOC269213     | 0.0634689   | 1.0064  |
| 3732409C05RIK | 0.0108082   | 1.00639 |
| LOC100041194  | 0.0183418   | 1.00638 |
| A730069A04RIK | 0.0767884   | 1.00637 |
| A630085E16RIK | 0.0335105   | 1.00636 |
| GABARAPL2     | 0.0526189   | 1.00634 |
| D330004F16RIK | 0.0103905   | 1.00633 |
| LCE3F         | 0.0745815   | 1.00633 |
| 9430025L01RIK | 0.0135897   | 1.00631 |
| D930031I08RIK | 0.0534342   | 1.0063  |
| TMEM201       | 0.0448017   | 1.00628 |
| B130065N20RIK | 0.0785801   | 1.00628 |
| E230017J10RIK | 0.00626852  | 1.00627 |
| 5730585A16RIK | 0.021845    | 1.00627 |
| D330050H21RIK | 0.0367574   | 1.00627 |
| CYP2D12       | 0.0811755   | 1.00625 |
| 2610028F08RIK | 0.0651077   | 1.00623 |
| SH2D6         | 0.013518    | 1.00622 |
| MASS1         | 0.0276737   | 1.00622 |
| LOC381305     | 0.0792035   | 1.00622 |
| 6430519M23RIK | 0.0520442   | 1.00621 |
| HTR6          | 0.0596764   | 1.0062  |
| UBE2A         | 0.00597471  | 1.00619 |
| A530058L02RIK | 0.0673831   | 1.00619 |
| CPSF2         | 0.0311212   | 1.00618 |
| A630086P05RIK | 0.0844846   | 1.00618 |
| LOC208080     | 0.00285828  | 1.00616 |
| PGM3          | 0.0171312   | 1.00616 |
| 9430020K01RIK | 0.0229727   | 1.00615 |
| LOC383272     | 0.0784993   | 1.00615 |
| APH1A         | 0.0132558   | 1.00614 |
| PROSAPIP1     | 0.0735192   | 1.00613 |
| TBKBP1        | 0.0221469   | 1.00612 |
| 9330112I12RIK | 0.0575839   | 1.00612 |

|                                             |             |         |
|---------------------------------------------|-------------|---------|
| D330001K12RIK                               | 0.0261612   | 1.00611 |
| 6620401C13RIK                               | 0.0527089   | 1.00611 |
| LOC382100                                   | 0.000359602 | 1.0061  |
| A430059D01RIK                               | 0.075581    | 1.0061  |
| FIGLA                                       | 0.00378749  | 1.00609 |
| A930026H04RIK                               | 0.0289257   | 1.00608 |
| LOC272683                                   | 0.0695297   | 1.00608 |
| TSC1                                        | 0.0579482   | 1.00607 |
| LOC333621                                   | 0.00673204  | 1.00606 |
| G630008C18RIK                               | 0.0403384   | 1.00606 |
| C130086J11RIK                               | 0.0523908   | 1.00605 |
| LOC382091                                   | 0.000488847 | 1.00604 |
| CNN1                                        | 0.0700222   | 1.00604 |
| 4921531D08RIK                               | 0.0779654   | 1.00604 |
| A030003K21RIK                               | 0.0589725   | 1.00602 |
| LOC100048710                                | 0.0328485   | 1.00601 |
| 4930503L19RIK                               | 0.0759599   | 1.00601 |
| C230043E16RIK                               | 0.081663    | 1.00599 |
| LOC386196                                   | 0.0455529   | 1.00598 |
| SLURP1                                      | 0.0424083   | 1.00597 |
| D330035K16RIK                               | 0.0164647   | 1.00596 |
| CCDC57                                      | 0.0522858   | 1.00596 |
| SEC22C                                      | 0.0176557   | 1.00595 |
| CDC42SE2                                    | 0.0583743   | 1.00595 |
| FPR-RS7                                     | 0.0267222   | 1.00594 |
| RASGEF1B                                    | 0.0720794   | 1.00594 |
| 2510010K19RIK                               | 0.0709361   | 1.00592 |
| 5031409G22RIK                               | 0.0715013   | 1.00592 |
| B230371M02RIK                               | 0.0793973   | 1.00592 |
| SCL000309.1_341                             | 0.0615038   | 1.00591 |
| LOC381380                                   | 0.0110722   | 1.00587 |
| CALML4                                      | 0.0310244   | 1.00587 |
| 5730530J16RIK                               | 0.00320154  | 1.00586 |
| AP1GBP1                                     | 0.0291519   | 1.00586 |
| B130065L01                                  | 0.0535602   | 1.00586 |
| EG545124                                    | 0.0456183   | 1.00585 |
| D130035M05RIK                               | 0.070168    | 1.00585 |
| LOC384496                                   | 0.00346445  | 1.00584 |
| TGFA                                        | 0.0700404   | 1.00583 |
| 4921517D21RIK                               | 0.0194366   | 1.00582 |
| A930014B11RIK                               | 0.0691394   | 1.00582 |
| IGKV4-80_AJ231213_IG_KAPPA_VARIABLE_4-80_91 | 0.0205704   | 1.00581 |
| 1200016L19RIK                               | 0.0725302   | 1.00581 |
| D330017D17RIK                               | 0.0309545   | 1.00579 |
| BC027582                                    | 0.0771587   | 1.00577 |
| D930012N15RIK                               | 0.0185192   | 1.00576 |
| DDX10                                       | 0.0842566   | 1.00576 |
| LCN3                                        | 0.0731998   | 1.00575 |
| D030028O16RIK                               | 0.00781554  | 1.00574 |
| 2900052M09RIK                               | 0.0183789   | 1.00574 |
| SHC3                                        | 0.0302161   | 1.00574 |
| C130066G14RIK                               | 0.0806763   | 1.00574 |
| C730004I03RIK                               | 0.0567095   | 1.00573 |
| LOC384086                                   | 0.00292476  | 1.00572 |
| KLB                                         | 0.0153876   | 1.00572 |
| A530010L13RIK                               | 0.0636685   | 1.00572 |
| 5031409G23                                  | 0.0718414   | 1.00572 |
| 2900016B01RIK                               | 0.0592728   | 1.00571 |

|                                             |             |         |
|---------------------------------------------|-------------|---------|
| B930008G09RIK                               | 0.0465116   | 1.0057  |
| TAS2R144                                    | 0.0316419   | 1.00568 |
| LOC384847                                   | 0.0612387   | 1.00568 |
| LOC381388                                   | 0.06915     | 1.00568 |
| TRIM2                                       | 0.0800647   | 1.00568 |
| LCN10                                       | 0.0152989   | 1.00567 |
| LOC386476                                   | 0.0476706   | 1.00567 |
| EG237009                                    | 0.0572518   | 1.00567 |
| LOC626347                                   | 0.0091363   | 1.00566 |
| 4922502B01RIK                               | 0.0231753   | 1.00566 |
| B930044G13RIK                               | 0.0464722   | 1.00563 |
| NR5A2                                       | 0.0273027   | 1.00562 |
| LOC668863                                   | 0.0693668   | 1.00562 |
| RNF186                                      | 0.0661583   | 1.00561 |
| D10627                                      | 0.0686074   | 1.0056  |
| LOC381552                                   | 0.0211034   | 1.00559 |
| BC052360                                    | 0.0334585   | 1.00559 |
| CEP1                                        | 0.0378469   | 1.00559 |
| 4833427G06RIK                               | 0.0456853   | 1.00559 |
| A630095E13RIK                               | 0.0122683   | 1.00558 |
| COIL                                        | 0.0328209   | 1.00558 |
| 2610010G17RIK                               | 0.0322707   | 1.00556 |
| INPP4B                                      | 0.0341567   | 1.00555 |
| A230072B04RIK                               | 0.0557636   | 1.00553 |
| 6720407G21RIK                               | 0.0379962   | 1.00552 |
| BAZ2A                                       | 0.0366202   | 1.00551 |
| 1700012F10RIK                               | 0.0602456   | 1.0055  |
| 4933413N12RIK                               | 0.080735    | 1.0055  |
| 2310079F23RIK                               | 0.0410672   | 1.00549 |
| PRRG4                                       | 0.00877329  | 1.00546 |
| OLFR477                                     | 0.0540611   | 1.00546 |
| EG546150                                    | 0.00209201  | 1.00545 |
| SPINK5                                      | 0.012304    | 1.00545 |
| IGHV5S15_AF290966_IG_HEAVY_VARIABLE_5S15_49 | 0.0430605   | 1.00545 |
| PYCR1                                       | 0.0633214   | 1.00541 |
| A630008H02RIK                               | 0.0760884   | 1.00541 |
| H2LS                                        | 0.0214231   | 1.0054  |
| E030040E19RIK                               | 0.0815833   | 1.0054  |
| D030065B14RIK                               | 0.0574538   | 1.00538 |
| KCTD11                                      | 0.0574956   | 1.00538 |
| PEL12                                       | 0.0297862   | 1.00536 |
| NEIL3                                       | 0.0117519   | 1.00534 |
| MPP4                                        | 0.0849504   | 1.00534 |
| AV273951                                    | 0.0239095   | 1.00533 |
| A130071D18RIK                               | 0.031183    | 1.00533 |
| OLFR131                                     | 0.0804586   | 1.00533 |
| EG386551                                    | 0.0191256   | 1.00532 |
| LOC383074                                   | 0.00897783  | 1.00531 |
| LOC386273                                   | 0.0139368   | 1.00531 |
| NEK7                                        | 0.0693452   | 1.00531 |
| TCF15                                       | 0.0118113   | 1.0053  |
| ANK1                                        | 0.0372429   | 1.0053  |
| NR3C1                                       | 0.00605462  | 1.00529 |
| OLFR1263                                    | 0.000701285 | 1.00529 |
| SERPINB1B                                   | 0.000564435 | 1.00529 |
| OLFR689                                     | 0.00869432  | 1.00528 |
| LOC327767                                   | 0.0332929   | 1.00528 |
| SORBS2                                      | 0.00633566  | 1.00527 |

|                                         |             |         |
|-----------------------------------------|-------------|---------|
| SCL0002720.1_68                         | 0.0348022   | 1.00524 |
| 9430002A10RIK                           | 0.053213    | 1.00524 |
| A630082N15RIK                           | 0.0457292   | 1.00523 |
| 1700021A07RIK                           | 0.0589247   | 1.00523 |
| CORO7                                   | 0.059055    | 1.00523 |
| 4833406C17RIK                           | 0.0699317   | 1.00523 |
| G430005B15RIK                           | 0.047265    | 1.00522 |
| NFKBIB                                  | 0.0614745   | 1.0052  |
| A130095C03RIK                           | 0.0630871   | 1.0052  |
| IGHV7S2_J00500_IG_HEAVY_VARIABLE_7S2_59 | 0.0269792   | 1.00519 |
| 9830134N18RIK                           | 0.021906    | 1.00518 |
| IL20                                    | 0.0267641   | 1.00518 |
| TSSK5                                   | 0.0794624   | 1.00516 |
| SLC25A46                                | 0.0620987   | 1.00515 |
| SPIB                                    | 0.0305958   | 1.00514 |
| MAGEL2                                  | 0.071513    | 1.00512 |
| SLC17A1                                 | 0.0730602   | 1.00511 |
| 5033424B07RIK                           | 0.0472812   | 1.0051  |
| 9930005E07RIK                           | 0.0631855   | 1.0051  |
| OLFR50                                  | 0.0771642   | 1.00508 |
| SCL0003381.1_13                         | 0.0120425   | 1.00507 |
| LOC381444                               | 0.070422    | 1.00507 |
| FAM107A                                 | 0.0778007   | 1.00507 |
| BC021790                                | 0.0791212   | 1.00507 |
| A730027B03RIK                           | 0.00128183  | 1.00506 |
| LOC100045524                            | 0.0587181   | 1.00505 |
| LOC386117                               | 0.0743022   | 1.00504 |
| E430039K24RIK                           | 0.0237459   | 1.00503 |
| FBXO16                                  | 0.0642267   | 1.00503 |
| 4632419K20RIK                           | 0.0172857   | 1.00502 |
| GFM                                     | 0.0217698   | 1.00502 |
| 9230103K20RIK                           | 0.0743983   | 1.00502 |
| IIGP1                                   | 0.000182894 | 1.005   |
| LOC383049                               | 0.0464134   | 1.00499 |
| HEATR5A                                 | 0.0622071   | 1.00499 |
| FOXL2                                   | 0.0127498   | 1.00498 |
| KRT79                                   | 0.0269727   | 1.00498 |
| MEFV                                    | 0.00823271  | 1.00497 |
| GPR150                                  | 0.0705876   | 1.00496 |
| XEDAR EDA-A2R                           | 0.0360307   | 1.00495 |
| KLK1                                    | 0.072205    | 1.00495 |
| D130035C10RIK                           | 0.0343768   | 1.00493 |
| LOC240761                               | 0.00632432  | 1.00492 |
| CASKIN1                                 | 0.0276887   | 1.00492 |
| EMU2-PENDING                            | 0.0533032   | 1.00492 |
| LOC386442                               | 0.0711015   | 1.00492 |
| KIF21B                                  | 0.0143899   | 1.00491 |
| 1700124K17RIK                           | 0.0435026   | 1.00491 |
| SRD5A2L2                                | 0.0462563   | 1.00491 |
| EG433634                                | 0.061472    | 1.0049  |
| 5730596B20RIK                           | 0.0229307   | 1.00489 |
| LOC277046                               | 0.00346284  | 1.00488 |
| SIX2                                    | 0.0165063   | 1.00488 |
| LOC195534                               | 0.0687897   | 1.00488 |
| 2010109K11RIK                           | 0.0697838   | 1.00488 |
| EIF2C3                                  | 0.0624258   | 1.00487 |
| OLFR1355                                | 0.0500545   | 1.00486 |
| LOC100039829                            | 0.032425    | 1.00485 |

|                    |             |         |
|--------------------|-------------|---------|
| D5ERTD40E          | 0.0279559   | 1.00484 |
| LANCL3             | 0.0341336   | 1.00484 |
| GM73               | 0.0672044   | 1.00484 |
| LOC380691          | 0.0111517   | 1.00483 |
| OTTMUSG00000012631 | 0.0140379   | 1.00483 |
| NANP               | 0.0253573   | 1.00483 |
| 3010022N24RIK      | 0.0572901   | 1.00483 |
| LOC385368          | 0.0653895   | 1.00483 |
| 2500001N03RIK      | 0.0673952   | 1.00483 |
| LOC637337          | 0.0242839   | 1.00482 |
| C230059C13RIK      | 0.0556214   | 1.00482 |
| 2610528A11RIK      | 0.0567537   | 1.00482 |
| 6030447G11RIK      | 0.0667444   | 1.00482 |
| LOC266459          | 0.081542    | 1.00482 |
| LOC677473          | 0.066477    | 1.00481 |
| LOC380869          | 0.080792    | 1.00481 |
| A330040H08RIK      | 0.00523696  | 1.0048  |
| LOC383856          | 0.0502791   | 1.00479 |
| SLC9A9             | 0.0395859   | 1.00478 |
| 4933440H19RIK      | 0.0841447   | 1.00478 |
| HOXD10             | 0.0235112   | 1.00476 |
| RPA2               | 0.0805706   | 1.00476 |
| MMP28              | 0.00538002  | 1.00475 |
| GPM6B              | 0.0143201   | 1.00475 |
| SLC43A3            | 0.0591088   | 1.00474 |
| LOC100047923       | 0.0665521   | 1.00473 |
| A130022A09RIK      | 0.0699132   | 1.00473 |
| C230060F13RIK      | 0.00864836  | 1.00472 |
| 0610010K14RIK      | 0.0282735   | 1.00472 |
| PARD3B             | 0.0846703   | 1.0047  |
| CYPT6              | 0.0354781   | 1.00469 |
| SPAG1              | 0.0481972   | 1.00469 |
| BARD1              | 0.0653003   | 1.00469 |
| BC024814           | 0.0716392   | 1.00468 |
| H2-T18             | 0.0250404   | 1.00467 |
| GPR142             | 0.0262958   | 1.00467 |
| AI854517           | 0.0288775   | 1.00467 |
| OLFR1166           | 0.0346123   | 1.00467 |
| ZNF142             | 0.0727249   | 1.00467 |
| 4930515K21RIK      | 0.0543976   | 1.00466 |
| SCL0003499.1_101   | 0.000659747 | 1.00465 |
| OLFR741            | 0.00161766  | 1.00463 |
| MAP3K9             | 0.0343341   | 1.00463 |
| SP8                | 0.035062    | 1.00463 |
| TIEG               | 0.0351223   | 1.00463 |
| 5730437O09RIK      | 0.0653445   | 1.00463 |
| CCDC142            | 0.0702712   | 1.00463 |
| ABCG5              | 0.0143511   | 1.00462 |
| ZFH4-PENDING       | 0.0249424   | 1.00462 |
| 6330532E14RIK      | 0.036012    | 1.00462 |
| 5730590C14RIK      | 0.0505488   | 1.00462 |
| AGXT               | 0.071099    | 1.00462 |
| LOC270366          | 0.0744055   | 1.00462 |
| STAR               | 0.0553452   | 1.00461 |
| GIMAP5             | 0.065452    | 1.00461 |
| PDE5A              | 0.00782967  | 1.0046  |
| KLK1B22            | 0.0625392   | 1.0046  |
| LOC384082          | 0.0769467   | 1.0046  |

|               |            |         |
|---------------|------------|---------|
| A230055O04RIK | 0.0273967  | 1.00459 |
| LOC329277     | 0.0318957  | 1.00459 |
| D630024I10RIK | 0.00887149 | 1.00458 |
| E130311K13RIK | 0.0470058  | 1.00458 |
| LOC637047     | 0.0618495  | 1.00458 |
| LOC328820     | 0.0107278  | 1.00456 |
| MUC20         | 0.0793576  | 1.00456 |
| C820012K02RIK | 0.0480102  | 1.00455 |
| A130024C22RIK | 0.0553834  | 1.00455 |
| NOX1          | 0.0606304  | 1.00455 |
| KLRAQ1        | 0.00160915 | 1.00454 |
| KRTAP6-3      | 0.059088   | 1.00454 |
| 9030203C11RIK | 0.0282453  | 1.00453 |
| 4930415C24RIK | 0.00672877 | 1.00452 |
| COL4A3        | 0.0809952  | 1.00452 |
| CALCRL        | 0.0254814  | 1.00451 |
| SOHLH2        | 0.0546602  | 1.00451 |
| E230017C09RIK | 0.0482363  | 1.0045  |
| LOC232065     | 0.0155654  | 1.00449 |
| 4930584N22RIK | 0.0276983  | 1.00448 |
| SAST-PENDING  | 0.0576549  | 1.00448 |
| B230312E22RIK | 0.0613893  | 1.00448 |
| LOC243118     | 0.0289992  | 1.00447 |
| OLFR730       | 0.0537088  | 1.00447 |
| GGA3          | 0.0498031  | 1.00446 |
| OLFR1509      | 0.065264   | 1.00446 |
| A430042F24RIK | 0.0117788  | 1.00445 |
| C130087G11RIK | 0.0251662  | 1.00445 |
| E130010M05RIK | 0.0330943  | 1.00445 |
| LOC100047738  | 0.0361007  | 1.00444 |
| EMILIN1       | 0.0427275  | 1.00444 |
| OLFR697       | 0.0514076  | 1.00443 |
| KRTAP4-7      | 0.0724485  | 1.00443 |
| CTS8          | 0.0726637  | 1.00443 |
| 1810018F18RIK | 0.0829344  | 1.00443 |
| LOC241962     | 0.00931447 | 1.00442 |
| LOC626150     | 0.0488919  | 1.00442 |
| LOC233710     | 0.0817578  | 1.00442 |
| A330072B11RIK | 0.023903   | 1.00441 |
| PLA2G6        | 0.0313623  | 1.00441 |
| LOC328091     | 0.0686269  | 1.00441 |
| RWDD2B        | 0.0719125  | 1.00441 |
| GNGT1         | 0.0844747  | 1.00441 |
| NKX2-6        | 0.05959    | 1.0044  |
| HCN1          | 0.0375905  | 1.00439 |
| C6            | 0.0693917  | 1.00438 |
| MTAP7D3       | 0.0565733  | 1.00437 |
| PALM2         | 0.0577289  | 1.00437 |
| FGF23         | 0.00844743 | 1.00436 |
| 2310058A03RIK | 0.0281115  | 1.00436 |
| ADAT1         | 0.0443353  | 1.00436 |
| 1700007K09RIK | 0.0218747  | 1.00435 |
| UNC13H1       | 0.0272768  | 1.00435 |
| CLNK          | 0.0404547  | 1.00435 |
| B230206H07RIK | 0.0352696  | 1.00433 |
| TOPBP1        | 0.0840063  | 1.00433 |
| LOC628994     | 0.0423014  | 1.00432 |
| CKAP4         | 0.0428217  | 1.00432 |



|                    |            |         |
|--------------------|------------|---------|
| D930021N14         | 0.0465148  | 1.00432 |
| COL28A1            | 0.0829229  | 1.00432 |
| KATNAL1            | 0.0570141  | 1.00431 |
| D930039D09RIK      | 0.0631192  | 1.00431 |
| 9530020O07RIK      | 0.0608333  | 1.0043  |
| LOC385817          | 0.0818781  | 1.0043  |
| RLN3               | 0.0039309  | 1.00429 |
| 9430041J06RIK      | 0.0494628  | 1.00429 |
| LOC100039753       | 0.0689455  | 1.00429 |
| 1600010O03RIK      | 0.0697729  | 1.00429 |
| 4931422A14RIK      | 0.0115805  | 1.00426 |
| QSOX2              | 0.0588064  | 1.00426 |
| CD5L               | 0.0708235  | 1.00426 |
| B930032P17RIK      | 0.0258434  | 1.00425 |
| 9530014N24RIK      | 0.0574545  | 1.00425 |
| OLFR104            | 0.0794391  | 1.00424 |
| LOC210633          | 0.0804235  | 1.00424 |
| OLFR204            | 0.0518749  | 1.00423 |
| OLFR1168           | 0.0837773  | 1.00423 |
| ZPBP2              | 0.0410605  | 1.00422 |
| TOX2               | 0.0507339  | 1.00421 |
| INVS               | 0.0105041  | 1.0042  |
| SCL0003231.1_13    | 0.037939   | 1.0042  |
| OTTMUSG00000000480 | 0.0833788  | 1.0042  |
| LOC242607          | 0.057895   | 1.00419 |
| B230325K09RIK      | 0.0355509  | 1.00418 |
| EEF1A2             | 0.0831434  | 1.00418 |
| TEX101             | 0.0759289  | 1.00417 |
| MIXL1              | 0.0842436  | 1.00417 |
| LOC382183          | 0.0276931  | 1.00416 |
| A730091E08RIK      | 0.0370235  | 1.00416 |
| D830007B15RIK      | 0.0181818  | 1.00415 |
| TNFRSF1B           | 0.0411195  | 1.00415 |
| HMBOX1             | 0.0433938  | 1.00415 |
| TYMP               | 0.054423   | 1.00415 |
| KIFC5C             | 0.0685617  | 1.00415 |
| 4933402G07RIK      | 0.0843493  | 1.00414 |
| C430002M09RIK      | 0.0071347  | 1.00413 |
| SCL0003936.1_5     | 0.0205323  | 1.00413 |
| LOC381867          | 0.0464177  | 1.00413 |
| F730005M08RIK      | 0.0468353  | 1.00413 |
| D130067I07RIK      | 0.0693562  | 1.00413 |
| 2410137M14RIK      | 0.0789006  | 1.00413 |
| B630006N21RIK      | 0.00756073 | 1.00412 |
| ERMN               | 0.0249605  | 1.00412 |
| 8430404H04RIK      | 0.0708833  | 1.00412 |
| A530046M15         | 0.0770587  | 1.00412 |
| C230060D12RIK      | 0.0537743  | 1.00411 |
| LOC383001          | 0.0505014  | 1.0041  |
| ITIH5L             | 0.0839699  | 1.0041  |
| CPT1A              | 0.00221673 | 1.00409 |
| ERAS               | 0.0182861  | 1.00409 |
| 9845300_5604       | 0.0445206  | 1.00409 |
| FTMT               | 0.0701861  | 1.00409 |
| OTOR               | 0.0358731  | 1.00408 |
| A730041H09RIK      | 0.0466123  | 1.00408 |
| BANK1              | 0.0710409  | 1.00408 |
| LOC384469          | 0.00626151 | 1.00406 |

|                  |            |         |
|------------------|------------|---------|
| AI842396         | 0.0623226  | 1.00406 |
| TAS2R129         | 0.0642622  | 1.00406 |
| UGT2B5           | 0.0643938  | 1.00406 |
| CES7             | 0.00560057 | 1.00405 |
| LOC100047007     | 0.0170538  | 1.00405 |
| 6330514O11RIK    | 0.0412415  | 1.00405 |
| FUT11            | 0.0450958  | 1.00405 |
| 2810048G17RIK    | 0.0710421  | 1.00405 |
| 1110033F04RIK    | 0.00460167 | 1.00404 |
| LOC229958        | 0.0421716  | 1.00404 |
| LOC242377        | 0.0117489  | 1.00403 |
| A830027N12RIK    | 0.0382202  | 1.00403 |
| LOC383383        | 0.045522   | 1.00403 |
| SRP19            | 0.0727186  | 1.00403 |
| EG626305         | 0.0819941  | 1.00403 |
| LOC330474        | 0.00249524 | 1.00402 |
| KCND3            | 0.0281621  | 1.00402 |
| NTN2L            | 0.043926   | 1.00402 |
| LOC383494        | 0.0528848  | 1.00401 |
| TCF1             | 0.0620548  | 1.00401 |
| LOC381129        | 0.0813443  | 1.004   |
| SCL0001874.1_222 | 0.0346116  | 1.00399 |
| SCL0003052.1_338 | 0.0125444  | 1.00398 |
| MMP7             | 0.0545845  | 1.00398 |
| OLFR1416         | 0.06271    | 1.00398 |
| SERPINA1C        | 0.00833577 | 1.00397 |
| BUB3             | 0.0245687  | 1.00397 |
| 6430590A10RIK    | 0.00310773 | 1.00396 |
| E030001K11RIK    | 0.0262262  | 1.00396 |
| DDX56            | 0.0581545  | 1.00396 |
| PABPNL1          | 0.0128541  | 1.00395 |
| 0610038F15RIK    | 0.0252871  | 1.00395 |
| TOLLIP-PENDING   | 0.0377965  | 1.00394 |
| LOC381420        | 0.0398257  | 1.00394 |
| WDR66            | 0.0106836  | 1.00393 |
| SMTNL1           | 0.0447409  | 1.00393 |
| CSTL1            | 0.0475462  | 1.00393 |
| GAS2             | 0.00879374 | 1.00392 |
| OOG4             | 0.0199163  | 1.00392 |
| 2410080I02RIK    | 0.0373515  | 1.00392 |
| 1700041I07RIK    | 0.0672531  | 1.00392 |
| LOC239556        | 0.0217285  | 1.00391 |
| SEZ6             | 0.0819942  | 1.00391 |
| CNBP             | 0.0632044  | 1.0039  |
| RAI3             | 0.0598405  | 1.00389 |
| V1RE9            | 0.0641056  | 1.00389 |
| RAB2B            | 0.0827943  | 1.00389 |
| LCE1M            | 0.00220902 | 1.00388 |
| SIM1             | 0.0172718  | 1.00388 |
| MJ-7000-176_2342 | 0.0402782  | 1.00388 |
| ANAPC11          | 0.0676049  | 1.00388 |
| 4933427G17RIK    | 0.0757093  | 1.00388 |
| OLFR630          | 0.0281882  | 1.00387 |
| 0610035N01RIK    | 0.0527268  | 1.00387 |
| A330088F01RIK    | 0.0747181  | 1.00387 |
| TELO2            | 0.0765847  | 1.00387 |
| KIF11            | 0.0366694  | 1.00386 |
| 1700017D01RIK    | 0.0425587  | 1.00386 |

|                  |            |         |
|------------------|------------|---------|
| LOC385054        | 0.0587604  | 1.00386 |
| LOC271709        | 0.0261441  | 1.00385 |
| ELL2             | 0.0471052  | 1.00385 |
| NPTXR            | 0.0631726  | 1.00384 |
| D130098J21RIK    | 0.00809442 | 1.00383 |
| LOC100047053     | 0.0695519  | 1.00383 |
| 2510025K24RIK    | 0.0709102  | 1.00383 |
| D6MIT97          | 0.0399305  | 1.00382 |
| FUT7             | 0.0146676  | 1.00381 |
| CTRB1            | 0.00464216 | 1.0038  |
| ESRRBL1          | 0.0466219  | 1.0038  |
| A930029O05RIK    | 0.0727495  | 1.0038  |
| L3MBTL           | 0.0833767  | 1.0038  |
| SCL000877.1_11   | 0.00662479 | 1.00379 |
| SLC7A12          | 0.02812    | 1.00378 |
| LOC382001        | 0.03111116 | 1.00378 |
| E230013J01RIK    | 0.0360744  | 1.00378 |
| B430320O11RIK    | 0.00556684 | 1.00377 |
| C030003M13RIK    | 0.0553337  | 1.00377 |
| 6230412O07RIK    | 0.0553626  | 1.00377 |
| SCL0002531.1_14  | 0.00442142 | 1.00376 |
| PM20D1           | 0.0293588  | 1.00376 |
| LOC674008        | 0.00625863 | 1.00375 |
| LOC381804        | 0.0108813  | 1.00375 |
| RBKS             | 0.0460135  | 1.00375 |
| EG432985         | 0.0759399  | 1.00375 |
| TYW3             | 0.00614016 | 1.00374 |
| PHLPPL           | 0.0225343  | 1.00374 |
| MADCAM1          | 0.0431036  | 1.00374 |
| SCL0001333.1_125 | 0.00537982 | 1.00373 |
| 8030481M12RIK    | 0.044536   | 1.00373 |
| 4732485D01RIK    | 0.0670356  | 1.00373 |
| LOC385615        | 0.0801035  | 1.00373 |
| H2-T3            | 0.00610559 | 1.00372 |
| LOC100045284     | 0.0295372  | 1.00372 |
| RBM22            | 0.0634216  | 1.00372 |
| 1110049N09RIK    | 0.0150417  | 1.00371 |
| EXOSC9           | 0.0367922  | 1.00371 |
| CPT1B            | 0.0393093  | 1.00371 |
| LOC330134        | 0.0529709  | 1.00371 |
| D430029B19RIK    | 0.0139308  | 1.0037  |
| LOC384585        | 0.0251304  | 1.0037  |
| TRIM38           | 0.0587338  | 1.00369 |
| LOC383503        | 0.0700611  | 1.00369 |
| 1700030J15RIK    | 0.0737918  | 1.00369 |
| OLFR955          | 0.00233127 | 1.00368 |
| OLFR794          | 0.0127356  | 1.00368 |
| ADAMTSL3         | 0.0183519  | 1.00368 |
| LOC676929        | 0.0471372  | 1.00368 |
| 1700055M20RIK    | 0.0713016  | 1.00368 |
| D430034A07RIK    | 0.0609179  | 1.00367 |
| STXBP3A          | 0.0839699  | 1.00367 |
| VSX2             | 0.036486   | 1.00366 |
| LOC381051        | 0.0499275  | 1.00366 |
| LOC382867        | 0.0771555  | 1.00366 |
| D130039D18RIK    | 0.0403471  | 1.00365 |
| 1500010C09RIK    | 0.0638253  | 1.00365 |
| LOC331453        | 0.0719782  | 1.00365 |

|                    |             |         |
|--------------------|-------------|---------|
| LOC384412          | 0.0303222   | 1.00364 |
| TICAM1             | 0.0388569   | 1.00364 |
| OLFR706            | 0.0454898   | 1.00364 |
| SPINK10            | 0.0530194   | 1.00364 |
| LOC381198          | 0.0691656   | 1.00364 |
| KLK1B26            | 0.0749852   | 1.00364 |
| LOC382669          | 0.00223429  | 1.00362 |
| OLFR1346           | 0.035299    | 1.00362 |
| TGM6               | 0.0473342   | 1.00362 |
| LOC384357          | 0.0705217   | 1.00362 |
| KRT2               | 0.0731067   | 1.00362 |
| BC042761           | 0.080169    | 1.00362 |
| RAD51C             | 0.00378255  | 1.00361 |
| IGSF5              | 0.0608633   | 1.00361 |
| 2010309J24RIK      | 0.00620025  | 1.0036  |
| 4932407I05         | 0.0164258   | 1.0036  |
| B230362M20RIK      | 0.0043624   | 1.00359 |
| LOC100046278       | 0.00247547  | 1.00359 |
| OCM                | 0.0484347   | 1.00358 |
| 4930594M22RIK      | 0.0532732   | 1.00358 |
| CAR6               | 0.067741    | 1.00358 |
| CEACAM18           | 0.0693365   | 1.00358 |
| ZFP612             | 0.0768054   | 1.00358 |
| OTTMUSG00000000514 | 0.0498662   | 1.00357 |
| LOC386154          | 0.0602014   | 1.00357 |
| SCL000460.1_17     | 0.06425     | 1.00357 |
| GM414              | 0.0226482   | 1.00356 |
| MOR                | 0.0604752   | 1.00356 |
| OLFR148            | 0.0708917   | 1.00356 |
| OLFR474            | 0.0675022   | 1.00355 |
| FBLN5              | 0.0376346   | 1.00354 |
| KIF2A              | 0.00553602  | 1.00353 |
| KLRA5              | 0.00724827  | 1.00353 |
| LOC386379          | 0.0311752   | 1.00353 |
| AI987692           | 0.0433738   | 1.00353 |
| LOC671564          | 0.0477086   | 1.00353 |
| D930040M24RIK      | 0.0580352   | 1.00353 |
| LOC329055          | 0.0817963   | 1.00353 |
| LOC100048112       | 0.0788444   | 1.00352 |
| SCL0070954.1_214   | 0.000655083 | 1.00351 |
| OLFR1182           | 0.0282484   | 1.00351 |
| 9230110C19RIK      | 0.0429981   | 1.00351 |
| PCDH10             | 0.0668244   | 1.00351 |
| E230026C15RIK      | 0.0756238   | 1.00351 |
| LOC385977          | 0.0805067   | 1.00351 |
| D930049F02RIK      | 0.0347099   | 1.0035  |
| SEC8               | 0.0363792   | 1.0035  |
| D730040F13RIK      | 0.065144    | 1.0035  |
| NAAA               | 0.05409     | 1.00349 |
| SLC19A3            | 0.0626016   | 1.00349 |
| FGF9               | 0.0681769   | 1.00349 |
| LOC381792          | 0.0723545   | 1.00349 |
| 1700023C21RIK      | 0.0296173   | 1.00348 |
| LOC238447          | 0.0551147   | 1.00348 |
| 4930448I06RIK      | 0.00465881  | 1.00347 |
| A630064F15RIK      | 0.0349509   | 1.00347 |
| LOC381447          | 0.0463211   | 1.00347 |
| GK5                | 0.00342538  | 1.00346 |

|               |            |         |
|---------------|------------|---------|
| NAIF1         | 9.21E-05   | 1.00345 |
| PADI3         | 0.0694316  | 1.00345 |
| 4931432E15RIK | 0.0188359  | 1.00344 |
| B130052F17RIK | 0.0495222  | 1.00344 |
| OLFR895       | 0.0844573  | 1.00344 |
| LRP5          | 0.0241465  | 1.00343 |
| LONRF2        | 0.0494313  | 1.00343 |
| D630048A15RIK | 0.0616899  | 1.00343 |
| A530017D12RIK | 0.0806857  | 1.00343 |
| THAP2         | 0.0226808  | 1.00342 |
| LOC381700     | 0.0740016  | 1.00342 |
| SLC22A6       | 0.0776208  | 1.00342 |
| LOC382358     | 0.00718225 | 1.00341 |
| PLCD4         | 0.0218155  | 1.00341 |
| LOC381977     | 0.0573609  | 1.00341 |
| 4930470H18RIK | 0.0137039  | 1.0034  |
| 9130221D24RIK | 0.0340141  | 1.0034  |
| MS4A12        | 0.037651   | 1.0034  |
| LOC384216     | 0.0759756  | 1.0034  |
| HOXC10        | 0.0466356  | 1.00339 |
| A630065D16RIK | 0.0489745  | 1.00339 |
| A930021K20RIK | 0.0518282  | 1.00339 |
| A430110N23RIK | 0.057073   | 1.00339 |
| TSGA13        | 0.0254354  | 1.00338 |
| LOC381466     | 0.040253   | 1.00338 |
| MDC1          | 0.0469144  | 1.00338 |
| LOC382465     | 0.04866    | 1.00338 |
| G630065C19RIK | 0.0846834  | 1.00338 |
| SAMD11        | 0.0381626  | 1.00337 |
| SNORD22       | 0.0501433  | 1.00337 |
| ARVCF         | 0.0748622  | 1.00337 |
| NLRP9C        | 0.0770665  | 1.00337 |
| PRRXL1        | 0.00651601 | 1.00336 |
| A430105C13RIK | 0.0513226  | 1.00336 |
| LOC383047     | 0.0766711  | 1.00336 |
| OLFR1513      | 0.0767474  | 1.00336 |
| MKIAA1294     | 0.0310201  | 1.00335 |
| 1700096C12RIK | 0.0470596  | 1.00335 |
| 1700014B07RIK | 0.0293369  | 1.00334 |
| FPR1          | 0.0723094  | 1.00334 |
| 2900060F21RIK | 0.0315308  | 1.00332 |
| SLC15A1       | 0.0577757  | 1.00332 |
| LOC245069     | 0.0579873  | 1.00332 |
| ZFP7          | 0.00846134 | 1.00331 |
| OLFR1239      | 0.0137064  | 1.00331 |
| ALDH1B1       | 0.04342    | 1.00331 |
| 6530409L22RIK | 0.00274285 | 1.0033  |
| LOC332175     | 0.0157487  | 1.0033  |
| 8430427K15    | 0.0354671  | 1.0033  |
| AU014947      | 0.0581238  | 1.0033  |
| 5830411O09RIK | 0.0678698  | 1.0033  |
| LOC195281     | 0.00748611 | 1.00329 |
| LOC384421     | 0.00569844 | 1.00329 |
| KIF27         | 0.0159663  | 1.00329 |
| D3WSU161E     | 0.0264303  | 1.00329 |
| LOC384293     | 0.0268939  | 1.00329 |
| 8430406I07RIK | 0.0452061  | 1.00329 |
| INSR          | 0.0530454  | 1.00329 |

|               |            |         |
|---------------|------------|---------|
| NARG2         | 0.0558955  | 1.00328 |
| 2900005I04RIK | 0.00326318 | 1.00327 |
| 4930451E10RIK | 0.00893007 | 1.00327 |
| OPTC          | 0.02431    | 1.00327 |
| LOC382821     | 0.0427748  | 1.00327 |
| LOC631071     | 0.0513202  | 1.00327 |
| D330045A20RIK | 0.0756963  | 1.00327 |
| DEFB10        | 0.0132863  | 1.00326 |
| OLFR381       | 0.0320056  | 1.00326 |
| CLRN3         | 0.0111124  | 1.00325 |
| EG240055      | 0.0301504  | 1.00325 |
| LOC238564     | 0.0616227  | 1.00325 |
| OLFR1463      | 0.00269857 | 1.00324 |
| KCNK10        | 0.0254927  | 1.00324 |
| DLEC1         | 0.0273282  | 1.00324 |
| LOC380720     | 0.0448154  | 1.00324 |
| AADA3L3       | 0.0684578  | 1.00324 |
| FCRH3         | 0.0788089  | 1.00324 |
| ARL10A        | 0.0796979  | 1.00324 |
| SPEER4F       | 0.0829338  | 1.00324 |
| METTL10       | 0.00823876 | 1.00323 |
| 4933403G17RIK | 0.0127708  | 1.00323 |
| LOC268781     | 0.0134127  | 1.00323 |
| 4930474N05RIK | 0.0249413  | 1.00323 |
| C530048O03RIK | 0.046972   | 1.00323 |
| LOC382715     | 0.0581035  | 1.00323 |
| PLSCR3        | 0.0612839  | 1.00323 |
| TPTE          | 0.0259162  | 1.00322 |
| RBL2          | 0.0403374  | 1.00322 |
| TAAR7D        | 0.0609154  | 1.00322 |
| 6430598J10RIK | 0.0810248  | 1.00322 |
| VNN1          | 0.0839453  | 1.00322 |
| LOC237403     | 0.0176126  | 1.00321 |
| LOC381269     | 0.0440611  | 1.00321 |
| APC7-PENDING  | 0.0541988  | 1.00321 |
| LRRC69        | 0.00919606 | 1.0032  |
| LOC100044443  | 0.0184194  | 1.0032  |
| SFXN2         | 0.060343   | 1.0032  |
| OLFR186       | 0.0364938  | 1.00319 |
| TGM5          | 0.0419063  | 1.00319 |
| V1RE3         | 0.0767419  | 1.00318 |
| TTC9          | 0.0191091  | 1.00317 |
| SPRR2J        | 0.0609854  | 1.00317 |
| LASS3         | 0.0636428  | 1.00317 |
| ZFP526        | 0.0250022  | 1.00315 |
| LOC386398     | 0.0489099  | 1.00315 |
| LOC330630     | 0.0823148  | 1.00315 |
| OA1           | 0.0458371  | 1.00314 |
| AK5           | 0.0489703  | 1.00314 |
| PLN           | 0.0656491  | 1.00314 |
| CD19          | 0.0671159  | 1.00312 |
| 9845300_2519  | 0.0830624  | 1.00312 |
| 9930039A11RIK | 0.0558579  | 1.00311 |
| LOC637754     | 0.0713194  | 1.0031  |
| TTRAP         | 0.0357796  | 1.00309 |
| REFBP2        | 0.0396603  | 1.00309 |
| LOC240879     | 0.0662485  | 1.00309 |
| RAD21         | 0.0676197  | 1.00309 |

|                                            |             |         |
|--------------------------------------------|-------------|---------|
| 4930529I22RIK                              | 0.0826473   | 1.00309 |
| GNAL                                       | 0.0836829   | 1.00309 |
| GYPA                                       | 0.0630301   | 1.00308 |
| 4930544M13RIK                              | 0.000164289 | 1.00307 |
| PNN                                        | 0.0269905   | 1.00307 |
| TEP1                                       | 0.0549351   | 1.00307 |
| LOC384769                                  | 0.0675106   | 1.00307 |
| C630030K01RIK                              | 0.0736874   | 1.00307 |
| CLCN5                                      | 0.0681423   | 1.00306 |
| A930103B21RIK                              | 0.0276608   | 1.00305 |
| SSFA1                                      | 0.0741959   | 1.00305 |
| LOC100040962                               | 0.0326223   | 1.00304 |
| NAALADL1                                   | 0.044607    | 1.00304 |
| 2310021H06RIK                              | 0.0831672   | 1.00304 |
| OLFR112                                    | 0.0240858   | 1.00303 |
| THSD2                                      | 0.0370747   | 1.00303 |
| GATA5                                      | 0.080805    | 1.00303 |
| 1700036D21RIK                              | 0.0224153   | 1.00302 |
| STAG3                                      | 0.0404577   | 1.00302 |
| CD300LG                                    | 0.083347    | 1.00302 |
| LOC382008                                  | 0.0203829   | 1.00301 |
| KCNA4                                      | 0.037185    | 1.00301 |
| IGHV10S3_AF064446_IG_HEAVY_VARIABLE_10S3_9 | 0.062814    | 1.00301 |
| PDE6A                                      | 0.0170239   | 1.003   |
| LOC329240                                  | 0.0175809   | 1.003   |
| 5730419A02RIK                              | 0.026117    | 1.003   |
| FABP1                                      | 0.0542088   | 1.003   |
| CES6                                       | 0.0806743   | 1.003   |
| BC030307                                   | 0.00268813  | 1.00299 |
| APBA2                                      | 0.0205195   | 1.00299 |
| LOC385308                                  | 0.061384    | 1.00299 |
| A930014D06RIK                              | 0.0653706   | 1.00299 |
| A430091G03RIK                              | 0.0203413   | 1.00298 |
| LOC330441                                  | 0.0744127   | 1.00298 |
| 1810011H11RIK                              | 0.0140092   | 1.00297 |
| 4930556B16RIK                              | 0.0188252   | 1.00297 |
| OLFR883                                    | 0.0215048   | 1.00297 |
| LOC383530                                  | 0.0661897   | 1.00297 |
| KCNJ4                                      | 0.0790195   | 1.00297 |
| SCFD2                                      | 0.00622898  | 1.00296 |
| LOC384537                                  | 0.0306014   | 1.00296 |
| C030019P07RIK                              | 0.0415892   | 1.00296 |
| 1110006G14RIK                              | 0.0155137   | 1.00295 |
| 1190020E20RIK                              | 0.0166506   | 1.00295 |
| V1RI5                                      | 0.0294288   | 1.00295 |
| ZFP759                                     | 0.040095    | 1.00295 |
| DMC1                                       | 0.0686524   | 1.00295 |
| D1ERTD622E                                 | 0.0711518   | 1.00295 |
| MYOD1                                      | 0.0723168   | 1.00295 |
| F830048M02RIK                              | 0.0676255   | 1.00294 |
| LACTB2                                     | 0.0188497   | 1.00293 |
| 3110052M02RIK                              | 0.0286893   | 1.00293 |
| 0610008F07RIK                              | 0.0526044   | 1.00293 |
| TEX22                                      | 0.0592133   | 1.00293 |
| SENP5                                      | 0.0652863   | 1.00293 |
| REX2                                       | 0.0770347   | 1.00293 |
| 1700013N18RIK                              | 0.0437316   | 1.00292 |
| LOC384616                                  | 0.0804339   | 1.00292 |

|                    |            |         |
|--------------------|------------|---------|
| 9430038G21RIK      | 0.00229539 | 1.00291 |
| C230060L03RIK      | 0.0282884  | 1.00291 |
| LOC383123          | 0.0448433  | 1.00291 |
| D930018F03RIK      | 0.00684435 | 1.0029  |
| OLFR1423           | 0.0504189  | 1.0029  |
| KLHL11             | 0.0431559  | 1.00289 |
| LOC328277          | 0.083856   | 1.00289 |
| LOC100041729       | 0.0290165  | 1.00288 |
| CHRM2              | 0.0342631  | 1.00287 |
| A530006F08RIK      | 0.0440159  | 1.00287 |
| 2610109H07RIK      | 0.0479134  | 1.00287 |
| A930104D05RIK      | 0.0584331  | 1.00287 |
| LOC381790          | 0.0303302  | 1.00286 |
| 6530403M18RIK      | 0.0184368  | 1.00285 |
| JAK1               | 0.0654716  | 1.00285 |
| 9626096_327_RC     | 0.0257459  | 1.00284 |
| EPO                | 0.0459427  | 1.00284 |
| PROCR              | 0.0670525  | 1.00284 |
| 2810046O15RIK      | 0.0711477  | 1.00284 |
| POP1               | 0.0722499  | 1.00284 |
| 4930560E09RIK      | 0.0812479  | 1.00284 |
| LOC382372          | 0.0441865  | 1.00283 |
| OLFR1465           | 0.0467221  | 1.00283 |
| FCRL5              | 0.00375724 | 1.00282 |
| 9629553_2023_RC    | 0.0452006  | 1.00282 |
| HEATR3             | 0.0499182  | 1.00282 |
| B230369F24RIK      | 0.0191081  | 1.00281 |
| 4933429E06RIK      | 0.0263699  | 1.00281 |
| DNM3               | 0.0414149  | 1.00281 |
| ORC1L              | 0.0528632  | 1.00281 |
| MKL2               | 0.0615158  | 1.00281 |
| D030055F01RIK      | 0.0744671  | 1.00281 |
| MJ-1000-77_495     | 0.0092454  | 1.0028  |
| DMPK               | 0.055735   | 1.0028  |
| A830015D01RIK      | 0.0473577  | 1.00279 |
| B430319F04RIK      | 0.0176315  | 1.00278 |
| RESP18             | 0.0736674  | 1.00278 |
| LRP1B              | 0.0761777  | 1.00278 |
| CGB                | 0.0809553  | 1.00278 |
| MPV17L             | 0.00492281 | 1.00277 |
| LOC381992          | 0.0376398  | 1.00277 |
| BC057022           | 0.0215446  | 1.00276 |
| B130010N03RIK      | 0.0394672  | 1.00276 |
| OLFR1289           | 0.0586441  | 1.00276 |
| TUBGCP6            | 0.00473198 | 1.00274 |
| LOC381452          | 0.0201323  | 1.00274 |
| OLFR678            | 0.0536572  | 1.00274 |
| GM749              | 0.0536869  | 1.00274 |
| LOC240779          | 0.00670592 | 1.00273 |
| 2410089E03RIK      | 0.026813   | 1.00273 |
| ACCN5              | 0.0389459  | 1.00273 |
| OLFR401            | 0.0418139  | 1.00273 |
| D630024B06RIK      | 0.06074    | 1.00273 |
| OTTMUSG00000008911 | 0.0825421  | 1.00273 |
| LOC218165          | 0.0223311  | 1.00272 |
| TMPRSS11A          | 0.0843766  | 1.00272 |
| LOC385037          | 0.0788412  | 1.0027  |
| F830030F15RIK      | 9.09E-05   | 1.00269 |



|                    |             |         |
|--------------------|-------------|---------|
| AGTR2              | 0.0384311   | 1.00269 |
| OTTMUSG00000005300 | 0.00358615  | 1.00268 |
| CCDC77             | 0.0100193   | 1.00268 |
| LOC546233          | 0.0165813   | 1.00268 |
| GM378              | 0.0717724   | 1.00268 |
| 5730575G16RIK      | 0.0751181   | 1.00268 |
| LOC229571          | 0.0339347   | 1.00267 |
| TUBAL3             | 0.0196643   | 1.00266 |
| USHBP1             | 0.0395916   | 1.00266 |
| 1810044B20RIK      | 0.0419282   | 1.00266 |
| MJ-3000-106_2479   | 0.0505745   | 1.00266 |
| SVA                | 0.000806191 | 1.00265 |
| NPY5R              | 0.0728333   | 1.00265 |
| C230059B01RIK      | 0.0110764   | 1.00264 |
| AW555814           | 0.0171433   | 1.00264 |
| HIST1H2AA          | 0.0238146   | 1.00264 |
| G430046L24RIK      | 0.0848629   | 1.00264 |
| 3110001I22RIK      | 0.00557256  | 1.00263 |
| LOC665432          | 0.0401802   | 1.00263 |
| OLFR1441           | 0.0762791   | 1.00263 |
| V1RG6              | 0.00414284  | 1.00262 |
| TULP1              | 0.0339846   | 1.00262 |
| 1700108F19RIK      | 0.0772581   | 1.00262 |
| LOC384457          | 0.00470617  | 1.00261 |
| LOC211095          | 0.0388662   | 1.00261 |
| COL9A3             | 0.0695791   | 1.00261 |
| IGK-V              | 0.0756577   | 1.00261 |
| F830018F06RIK      | 0.0761352   | 1.00261 |
| 4921535G17RIK      | 0.000720944 | 1.0026  |
| F730046H10RIK      | 0.0461902   | 1.0026  |
| NANOS3             | 0.0525821   | 1.0026  |
| SYT2               | 0.0527075   | 1.0026  |
| B430203M17RIK      | 0.057317    | 1.0026  |
| OLFR1222           | 0.0101007   | 1.00259 |
| LOC668030          | 0.047158    | 1.00259 |
| NCOA1              | 0.0475975   | 1.00259 |
| GUCY2E             | 0.00655092  | 1.00258 |
| SERPINA10          | 0.00634366  | 1.00258 |
| SLC6A13            | 0.0237807   | 1.00258 |
| RHOX3F             | 0.0565505   | 1.00258 |
| HRH2               | 0.0750477   | 1.00258 |
| ADCY1              | 0.077168    | 1.00258 |
| LOC100047710       | 0.0192994   | 1.00257 |
| PRIM1              | 0.0764276   | 1.00257 |
| 2310046K01RIK      | 0.0823422   | 1.00257 |
| LOC382815          | 0.056659    | 1.00256 |
| LOC383111          | 0.0799707   | 1.00256 |
| 9330171B01RIK      | 0.0135314   | 1.00255 |
| B930088D18RIK      | 0.0236362   | 1.00255 |
| LOC218298          | 0.0399872   | 1.00255 |
| SCL000959.1_2      | 0.0532484   | 1.00255 |
| LY6F               | 0.0567695   | 1.00255 |
| OLFR203            | 0.053186    | 1.00254 |
| ABCB9              | 0.0666021   | 1.00254 |
| TMEM7              | 0.067609    | 1.00254 |
| G630039M15RIK      | 0.00907281  | 1.00253 |
| CACNG3             | 0.011505    | 1.00253 |
| E030037J05RIK      | 0.0262573   | 1.00253 |

|                 |             |         |
|-----------------|-------------|---------|
| 4930542C12RIK   | 0.0300936   | 1.00253 |
| LOC232577       | 0.0330862   | 1.00253 |
| A830007N09RIK   | 0.00497499  | 1.00252 |
| TDRD1           | 0.0072045   | 1.00252 |
| HCLS1           | 0.0585509   | 1.00252 |
| JSRP1           | 0.0696412   | 1.00252 |
| 5930400O16RIK   | 0.0197656   | 1.00251 |
| D030040J03RIK   | 0.0253118   | 1.00251 |
| PIGY            | 0.0493914   | 1.00251 |
| 9630020E24RIK   | 0.0806815   | 1.00251 |
| PCDHA2          | 0.000870571 | 1.0025  |
| WFDC13          | 0.0586405   | 1.0025  |
| NECL1-PENDING   | 0.0646007   | 1.0025  |
| ATAD5           | 0.0708734   | 1.0025  |
| ISOC1           | 0.0778367   | 1.0025  |
| A230068D05RIK   | 0.0820264   | 1.0025  |
| LOC434960       | 0.00382465  | 1.00249 |
| E030004P15RIK   | 0.0140395   | 1.00249 |
| LIMS1           | 0.0184154   | 1.00249 |
| COLQ            | 0.0139315   | 1.00248 |
| ARSI            | 0.0173697   | 1.00248 |
| SF3B1           | 0.0181399   | 1.00248 |
| TC10L-PENDING   | 0.0520194   | 1.00248 |
| LOC639558       | 0.0754088   | 1.00248 |
| PTDSS1          | 0.0778954   | 1.00248 |
| TACR3           | 0.0063067   | 1.00247 |
| TRPM8           | 0.0104032   | 1.00247 |
| LOC268939       | 0.0269362   | 1.00247 |
| A830091E24RIK   | 0.0462256   | 1.00247 |
| LOC383033       | 0.053612    | 1.00247 |
| OLFR1259        | 0.0729347   | 1.00247 |
| 6330579M01RIK   | 0.0760145   | 1.00247 |
| 9627521_3631_RC | 0.0776476   | 1.00247 |
| BCL6B           | 0.00730462  | 1.00246 |
| 1700008P02RIK   | 0.0232497   | 1.00246 |
| SPIN4           | 0.0316847   | 1.00246 |
| CD209A          | 0.022263    | 1.00245 |
| 2810003K23RIK   | 0.0564301   | 1.00245 |
| HAMP2           | 0.0598869   | 1.00245 |
| A130002I06RIK   | 0.0614313   | 1.00245 |
| NLRP4A          | 0.0634848   | 1.00245 |
| 1200011M11RIK   | 0.0534724   | 1.00244 |
| TGDS            | 0.0653744   | 1.00244 |
| LOC238599       | 0.0172725   | 1.00243 |
| MAPKSP1         | 0.0392559   | 1.00243 |
| LOC382243       | 0.056789    | 1.00243 |
| 2400002C23RIK   | 0.0595725   | 1.00243 |
| LOC100040384    | 0.0660379   | 1.00243 |
| LOC100045176    | 0.078765    | 1.00243 |
| C430048L16RIK   | 0.00272106  | 1.00242 |
| ZBED3           | 0.0069992   | 1.00242 |
| EG629678        | 0.0469283   | 1.00242 |
| C530024P05RIK   | 0.0518613   | 1.00242 |
| AA987161        | 0.0824663   | 1.00242 |
| B830017H08RIK   | 0.00569506  | 1.00241 |
| TPX2            | 0.0519286   | 1.00241 |
| 9130204K15RIK   | 0.0112537   | 1.0024  |
| PNMA5           | 0.0461401   | 1.0024  |

|                 |             |         |
|-----------------|-------------|---------|
| C230081H03RIK   | 0.0521138   | 1.0024  |
| 6720467J09RIK   | 0.0574617   | 1.0024  |
| LOC230602       | 0.0646909   | 1.0024  |
| LONRF3          | 0.0688536   | 1.00239 |
| LOC383460       | 0.0802795   | 1.00239 |
| 6030490I01RIK   | 0.0495916   | 1.00238 |
| 6720402K17RIK   | 0.0528149   | 1.00238 |
| 4921504I02RIK   | 0.0652999   | 1.00238 |
| APOL2           | 0.0662711   | 1.00238 |
| LOC672946       | 0.0809725   | 1.00238 |
| BUB1            | 0.00215764  | 1.00237 |
| LOC100045795    | 0.00151204  | 1.00237 |
| 2410127L17RIK   | 0.084093    | 1.00237 |
| 5730466H23RIK   | 0.065583    | 1.00236 |
| CPNE3           | 0.0689064   | 1.00236 |
| IKZF3           | 0.0774696   | 1.00236 |
| BC053393        | 0.0244956   | 1.00235 |
| DHRS13          | 0.0532759   | 1.00235 |
| LOC385653       | 0.0609501   | 1.00235 |
| CMKBR2          | 0.0644026   | 1.00235 |
| E130317O18RIK   | 0.00868023  | 1.00234 |
| EG545963        | 0.00866591  | 1.00234 |
| MINA            | 0.0112931   | 1.00234 |
| ZFYVE28         | 0.0346863   | 1.00234 |
| OPN1SW          | 0.0155358   | 1.00233 |
| OLFR765         | 0.0567828   | 1.00233 |
| 2310061I04RIK   | 0.0590777   | 1.00233 |
| UTP18           | 0.079415    | 1.00233 |
| OLFR1156        | 0.0801182   | 1.00233 |
| LOC209112       | 0.0188407   | 1.00232 |
| LOC386513       | 0.0108507   | 1.00231 |
| LOC383541       | 0.0116799   | 1.00231 |
| LOC383674       | 0.0321224   | 1.00231 |
| ZFP346          | 0.0348202   | 1.00231 |
| SCL0001951.1_12 | 0.000328181 | 1.0023  |
| 4933414E15RIK   | 0.0279069   | 1.0023  |
| MAP3K5          | 0.0497664   | 1.0023  |
| A330072G01RIK   | 0.0545621   | 1.0023  |
| LOC574405       | 0.0405966   | 1.00229 |
| 5330425C20RIK   | 0.065221    | 1.00229 |
| 4933413B09RIK   | 0.0713877   | 1.00229 |
| MAPK7           | 0.0302427   | 1.00228 |
| E130119H03RIK   | 0.0442549   | 1.00228 |
| 2410018I08RIK   | 0.0617566   | 1.00228 |
| B830017A01RIK   | 0.0635837   | 1.00228 |
| OLFR635         | 0.0127489   | 1.00227 |
| LOC545952       | 0.0300769   | 1.00227 |
| UBXN11          | 0.0410629   | 1.00227 |
| 8430437N05RIK   | 0.0429951   | 1.00226 |
| EG546250        | 0.0484532   | 1.00226 |
| 1700042B14RIK   | 0.0431182   | 1.00225 |
| LOC232974       | 0.0835345   | 1.00225 |
| A730020L20RIK   | 0.00818594  | 1.00224 |
| ADH6A           | 0.0708073   | 1.00224 |
| TLR12           | 0.00215026  | 1.00223 |
| CHRD2           | 0.0210908   | 1.00223 |
| METTL7A1        | 0.0516319   | 1.00223 |
| 3110040M04RIK   | 0.0731397   | 1.00223 |

|                |             |         |
|----------------|-------------|---------|
| OLFR575        | 0.0844491   | 1.00223 |
| PRDM16         | 0.00555665  | 1.00222 |
| LOC100041576   | 0.0608032   | 1.00222 |
| V1RB10         | 0.000382378 | 1.00221 |
| F830036K18RIK  | 0.0312987   | 1.0022  |
| ARHGAP5        | 0.0146415   | 1.00219 |
| D630033O11RIK  | 0.0399921   | 1.00219 |
| A630026F04     | 0.0523959   | 1.00219 |
| NUDCD1         | 0.0606752   | 1.00219 |
| LOC100047028   | 0.0823885   | 1.00219 |
| SLC14A2        | 0.0080513   | 1.00218 |
| LOC666363      | 0.0108743   | 1.00218 |
| MTERFD3        | 0.0221278   | 1.00218 |
| BB075781       | 0.0396334   | 1.00218 |
| SCL000896.1_70 | 0.0516299   | 1.00218 |
| LASS6          | 0.00618366  | 1.00217 |
| LOC100040159   | 0.00343279  | 1.00217 |
| 2610303G11RIK  | 0.0172476   | 1.00217 |
| AKR1C14        | 0.0244727   | 1.00216 |
| OLFR508        | 0.0281122   | 1.00216 |
| LOC240089      | 0.0405498   | 1.00216 |
| RASSF8         | 0.0165109   | 1.00215 |
| 4932411G08RIK  | 0.042602    | 1.00214 |
| B930075B08RIK  | 0.0670581   | 1.00214 |
| DSCAML1        | 0.0263223   | 1.00213 |
| KCNJ14         | 0.0808914   | 1.00212 |
| NWD1           | 0.0263726   | 1.00211 |
| LOC384830      | 0.0620699   | 1.00211 |
| EG631624       | 0.0825467   | 1.00211 |
| LOC236053      | 0.000375109 | 1.0021  |
| AGR3           | 0.0141936   | 1.0021  |
| A830021K08RIK  | 0.0671358   | 1.0021  |
| LOC384162      | 0.00420933  | 1.00209 |
| IGK-V1         | 0.0806074   | 1.00209 |
| 1700030F18RIK  | 0.0559028   | 1.00208 |
| 4930579N16RIK  | 0.0323074   | 1.00207 |
| SYNJ1          | 0.0375116   | 1.00207 |
| A530031I11RIK  | 0.0371552   | 1.00206 |
| 1700024B05RIK  | 0.0472513   | 1.00206 |
| PLCL2          | 0.0486477   | 1.00206 |
| B020031M17RIK  | 0.0744004   | 1.00206 |
| LOC383443      | 0.0780673   | 1.00206 |
| CCDC102A       | 0.0633745   | 1.00205 |
| MSX2           | 0.0192936   | 1.00204 |
| B230397F11RIK  | 0.00598047  | 1.00203 |
| CLDN22         | 0.0326256   | 1.00202 |
| OLFR30         | 0.0580729   | 1.00202 |
| C630017J20RIK  | 0.0303082   | 1.00201 |
| LOC384322      | 0.0410013   | 1.00201 |
| KCND1          | 0.0587977   | 1.002   |
| LOC385089      | 0.0134921   | 1.00199 |
| ZFP157         | 0.0210781   | 1.00199 |
| 4933440M02RIK  | 0.040662    | 1.00199 |
| 2810401C16RIK  | 0.0103947   | 1.00198 |
| PRL6A1         | 0.0450994   | 1.00198 |
| 2610510H03RIK  | 0.0662967   | 1.00198 |
| 2410095B20RIK  | 0.04982     | 1.00197 |
| A530079E22RIK  | 0.0663451   | 1.00197 |

|                                            |             |         |
|--------------------------------------------|-------------|---------|
| JMJD4                                      | 0.0796613   | 1.00197 |
| D130079A10RIK                              | 0.0122907   | 1.00196 |
| LOC383428                                  | 0.0134702   | 1.00196 |
| LOC214456                                  | 0.0194873   | 1.00195 |
| LOC381014                                  | 0.0380549   | 1.00195 |
| TAS2R137                                   | 0.0657714   | 1.00194 |
| AMBP                                       | 0.0509287   | 1.00193 |
| RGN                                        | 0.0786722   | 1.00193 |
| SLC10A2                                    | 0.0814355   | 1.00193 |
| DHRS7C                                     | 0.0167898   | 1.00192 |
| NCF2                                       | 0.029038    | 1.00192 |
| HFE2                                       | 0.0504078   | 1.00192 |
| OLFR207                                    | 0.0216088   | 1.00191 |
| LOC385904                                  | 0.0235851   | 1.00191 |
| ABPZ                                       | 0.036139    | 1.00191 |
| OTX3                                       | 0.0365912   | 1.00191 |
| OLFR744                                    | 0.0485106   | 1.00191 |
| IGHV1S57_D13200_IG_HEAVY_VARIABLE_1S57_245 | 0.0364933   | 1.0019  |
| 4930447A16RIK                              | 0.0602531   | 1.0019  |
| TTC32                                      | 0.0804591   | 1.0019  |
| UROC1                                      | 0.0391628   | 1.00189 |
| 4930521I23RIK                              | 0.0525756   | 1.00189 |
| GPR111                                     | 0.0034103   | 1.00188 |
| ART1                                       | 0.035185    | 1.00188 |
| PPT2                                       | 0.0844177   | 1.00188 |
| SCL0002978.1_3                             | 0.0753743   | 1.00187 |
| OLFR98                                     | 0.0254551   | 1.00186 |
| 4933406B17RIK                              | 0.0257338   | 1.00185 |
| 6430526O11RIK                              | 0.0455409   | 1.00185 |
| LOC630242                                  | 0.0786652   | 1.00185 |
| 4930564O18RIK                              | 0.0243655   | 1.00184 |
| LOC385200                                  | 0.0397662   | 1.00184 |
| OLFR1179                                   | 0.0399056   | 1.00184 |
| GRAP                                       | 0.0637506   | 1.00184 |
| SCL0002292.1_30                            | 0.0669792   | 1.00183 |
| D930020B18RIK                              | 0.0807148   | 1.00183 |
| GM1968                                     | 0.0595181   | 1.00182 |
| NEU4                                       | 0.074002    | 1.00182 |
| IL18BP                                     | 0.0119496   | 1.00181 |
| LOC277139                                  | 0.0199163   | 1.00181 |
| SPOCK1                                     | 0.0223282   | 1.00181 |
| ADA                                        | 0.0417173   | 1.00181 |
| FOXO4                                      | 0.0681219   | 1.0018  |
| LOC380925                                  | 0.0501155   | 1.00179 |
| CAP2                                       | 0.0216486   | 1.00178 |
| OLFR582                                    | 0.0302327   | 1.00178 |
| EG381070                                   | 0.0710572   | 1.00178 |
| SCL0002657.1_5                             | 0.0813222   | 1.00178 |
| OLFR527                                    | 0.0184579   | 1.00177 |
| OPALIN                                     | 0.0277819   | 1.00177 |
| MARCH1                                     | 0.0461951   | 1.00177 |
| FGA                                        | 0.0517221   | 1.00177 |
| D130002C14RIK                              | 0.0616836   | 1.00177 |
| IL8RB                                      | 0.0448789   | 1.00176 |
| B230112C05RIK                              | 0.000141379 | 1.00175 |
| 9530084K20RIK                              | 0.0583435   | 1.00175 |
| LOC230461                                  | 0.0217334   | 1.00174 |
| LOC624071                                  | 0.0632104   | 1.00174 |

|               |             |         |
|---------------|-------------|---------|
| LOC640196     | 0.0661032   | 1.00174 |
| WFDC15B       | 0.025543    | 1.00173 |
| EG664876      | 0.00587434  | 1.00172 |
| OLFR1107      | 0.0591003   | 1.00172 |
| SKAP1         | 0.0362839   | 1.00171 |
| ASB4          | 0.0468018   | 1.0017  |
| LOC386018     | 0.0525029   | 1.00169 |
| NEDD4B        | 0.0673986   | 1.00169 |
| OLFR1287      | 0.0688032   | 1.00169 |
| D330017J20RIK | 0.0814812   | 1.00169 |
| ITPA          | 0.0826802   | 1.00169 |
| 1200017F15RIK | 0.0831988   | 1.00169 |
| OLFR1105      | 0.0107253   | 1.00168 |
| ARRDC2        | 0.012965    | 1.00168 |
| 9830167H18RIK | 0.0552865   | 1.00168 |
| GHRHR         | 0.064797    | 1.00168 |
| LOC381515     | 0.0284065   | 1.00167 |
| D830015G02RIK | 0.0564464   | 1.00167 |
| OLFR599       | 0.0775798   | 1.00166 |
| 1600020E01RIK | 0.0253454   | 1.00164 |
| KRT80         | 0.0745174   | 1.00163 |
| LOC384491     | 0.0333902   | 1.00162 |
| LOC381647     | 0.0442851   | 1.00161 |
| LOC215253     | 0.0609674   | 1.00161 |
| OLFR498       | 0.0786031   | 1.0016  |
| A730098N08RIK | 0.0452456   | 1.00159 |
| END3          | 0.0703077   | 1.00159 |
| SPATA7        | 0.0439484   | 1.00158 |
| 1810046K07RIK | 0.000704605 | 1.00157 |
| LOC384681     | 0.0392451   | 1.00157 |
| LOC384659     | 0.00347147  | 1.00156 |
| RNASE12       | 0.0724107   | 1.00155 |
| PEX5L         | 0.0615644   | 1.00154 |
| 4921530G03RIK | 0.077569    | 1.00154 |
| 9330119M13RIK | 0.0482996   | 1.00153 |
| ZFP324        | 0.0704037   | 1.00153 |
| LOC100040701  | 0.0137636   | 1.00152 |
| GM1070        | 0.0402281   | 1.00152 |
| LOC546629     | 0.061499    | 1.00152 |
| ELOVL3        | 0.0658992   | 1.00152 |
| D130059C03RIK | 0.0691179   | 1.00152 |
| TLR11         | 0.00120731  | 1.00151 |
| NBN           | 0.0409114   | 1.00151 |
| FUCA2         | 0.0673969   | 1.00151 |
| LOC381645     | 0.0672556   | 1.0015  |
| GM1698        | 0.0774949   | 1.0015  |
| OLFR1186      | 0.0246791   | 1.00148 |
| E330018D23RIK | 0.046862    | 1.00148 |
| 4930415F15RIK | 0.0685325   | 1.00148 |
| D030065J16RIK | 0.0460859   | 1.00147 |
| ITGP          | 0.0610164   | 1.00147 |
| LOC100048579  | 0.0453494   | 1.00146 |
| 1700065I17RIK | 0.0576854   | 1.00145 |
| HEPHL1        | 0.0481121   | 1.00144 |
| MORN5         | 0.0487381   | 1.00144 |
| 4932418E24RIK | 0.0775168   | 1.00144 |
| DIAP3         | 0.0518247   | 1.00143 |
| 1700039E15RIK | 0.0836751   | 1.00143 |

|               |            |         |
|---------------|------------|---------|
| B230333P14RIK | 0.0197587  | 1.00142 |
| ITIH5         | 0.0108668  | 1.00141 |
| SLC27A5       | 0.0748009  | 1.0014  |
| A830035I23RIK | 0.0195353  | 1.00139 |
| LOC213014     | 0.0189999  | 1.00138 |
| LOC384839     | 0.0241915  | 1.00138 |
| MGC60742      | 0.0493045  | 1.00138 |
| LOC383067     | 0.0164791  | 1.00137 |
| LOC675815     | 0.0545299  | 1.00137 |
| 4933404G15RIK | 0.0741884  | 1.00137 |
| PSG26         | 0.0247074  | 1.00134 |
| MAST1         | 0.0380787  | 1.00134 |
| DEAR1         | 0.0605591  | 1.00134 |
| AI427809      | 0.0485321  | 1.00133 |
| 1700108K13RIK | 0.0289571  | 1.00132 |
| LIN28B        | 0.0465485  | 1.00131 |
| SIT1          | 0.0674802  | 1.00131 |
| AFP           | 0.0778517  | 1.0013  |
| LOC381267     | 0.0719723  | 1.00129 |
| LOC230970     | 0.057785   | 1.00128 |
| LZTFL1        | 0.0128845  | 1.00127 |
| RNASE13       | 0.0172886  | 1.00126 |
| GLRA4         | 0.0688642  | 1.00123 |
| NAT8L         | 0.0283944  | 1.00122 |
| 2310051M13RIK | 0.0659494  | 1.00122 |
| RAB3IL1       | 0.070969   | 1.00122 |
| LOC381455     | 0.0541142  | 1.00121 |
| OLFR738       | 0.0124232  | 1.0012  |
| A930005K01RIK | 0.0314632  | 1.0012  |
| F830010A05RIK | 0.0431003  | 1.00118 |
| L1CAM         | 0.0042796  | 1.00117 |
| LOC331012     | 0.00185629 | 1.00115 |
| 6720485J18RIK | 0.0113107  | 1.00113 |
| 9430050L06RIK | 0.0210783  | 1.00111 |
| GALNT9        | 0.037699   | 1.00111 |
| E330019L22RIK | 0.0389037  | 1.00111 |
| E330027M22RIK | 0.0576588  | 1.00111 |
| 2810047L02RIK | 0.0612897  | 1.00111 |
| LRP2          | 0.00550401 | 1.00107 |
| ENTPD7        | 0.0744101  | 1.00107 |
| KLF15         | 0.0603859  | 1.00106 |
| TDPOZ3        | 0.0615689  | 1.00106 |
| SEC15L1       | 0.00145612 | 1.00105 |
| V1RD7         | 0.0820498  | 1.00105 |
| LOC633661     | 0.0263417  | 1.00104 |
| CREB1         | 0.0450144  | 1.00104 |
| E430021E22RIK | 0.0674789  | 1.00104 |
| 1600012F09RIK | 0.0549582  | 1.001   |
| LOC668779     | 0.0639514  | 1.001   |
| LOC385292     | 0.0666582  | 1.001   |
| 1110034B05RIK | 0.0285768  | 1.00099 |
| CUBN          | 0.0821258  | 1.00098 |
| SGIP1         | 0.0350527  | 1.00097 |
| E030042M04RIK | 0.0468183  | 1.00092 |
| SLC7A2        | 0.0232309  | 1.0009  |
| PIRA11        | 0.0183925  | 1.00089 |
| A930038B10RIK | 0.0349019  | 1.00089 |
| SPATC1        | 0.077223   | 1.00089 |

|                |            |          |
|----------------|------------|----------|
| PROP1          | 0.0408963  | 1.00081  |
| RHOX11         | 0.0698322  | 1.00079  |
| LOC381842      | 0.002409   | 1.00072  |
| 4930419B13RIK  | 0.0744074  | 1.00072  |
| A430110O13RIK  | 0.0283744  | 1.00071  |
| GPR152         | 0.076282   | 1.00069  |
| ATOH8          | 0.053088   | 1.00068  |
| HOXA9          | 0.0691215  | 1.00065  |
| IPO7           | 0.00931289 | 1.00061  |
| CNTNAP5C       | 0.0561378  | 1.00055  |
| KREMEN-PENDING | 0.015939   | 1.00052  |
| RASL10A        | 0.00624705 | 1.00051  |
| LOC385279      | 0.0488531  | 1.00051  |
| LOC386560      | 0.0628404  | 1.00051  |
| LOC384190      | 0.0379325  | 1.00049  |
| A930029B02RIK  | 0.0142421  | 1.00043  |
| COL22A1        | 0.0108249  | 1.00038  |
| 1700030E15RIK  | 0.0653368  | 1.00038  |
| SNW1           | 0.0623767  | -1.00028 |
| RHOX10         | 0.0765903  | -1.00033 |
| PDE1A          | 0.0598029  | -1.00037 |
| LOC627081      | 0.0608006  | -1.00042 |
| FRMD3          | 0.0790623  | -1.00052 |
| D030015B04RIK  | 0.0374146  | -1.00059 |
| RGP1           | 0.0552435  | -1.00062 |
| BC052688       | 0.070162   | -1.0007  |
| SGSM1          | 0.0115749  | -1.00073 |
| C76746         | 0.0318442  | -1.00074 |
| LOC100044292   | 0.0224022  | -1.00078 |
| A030010B05RIK  | 0.0386166  | -1.0008  |
| SCL0003955.1_3 | 0.0748365  | -1.00081 |
| BC016495       | 0.0761663  | -1.00087 |
| LOC385883      | 0.0682818  | -1.00088 |
| PHKA1          | 0.0660321  | -1.00098 |
| PPEF2          | 0.0617646  | -1.00099 |
| PNPT1          | 0.00224929 | -1.00101 |
| CNTF           | 0.0285575  | -1.00101 |
| LOC100047833   | 0.0568459  | -1.00106 |
| H2-Q1          | 0.0538218  | -1.00111 |
| 4921538N17RIK  | 0.0843251  | -1.00111 |
| 1110037J23RIK  | 0.052834   | -1.00119 |
| 5430411J08RIK  | 0.0835647  | -1.00123 |
| 9629812_535    | 0.084253   | -1.00123 |
| 4930406P12RIK  | 0.073905   | -1.00125 |
| CRH            | 0.0196159  | -1.00126 |
| 4933422H20RIK  | 0.0280174  | -1.00129 |
| MIZF           | 0.0653419  | -1.00132 |
| GSDMA3         | 0.0224894  | -1.00137 |
| COX7A1         | 0.0630176  | -1.00141 |
| LOC382192      | 0.0584037  | -1.00146 |
| LOC100040328   | 0.0148889  | -1.0015  |
| PTPN3          | 0.0280771  | -1.00152 |
| CEL            | 0.0168502  | -1.00154 |
| INDOL1         | 0.0133737  | -1.00156 |
| 4930518C23RIK  | 0.0206616  | -1.00156 |
| A530012E19RIK  | 0.00375293 | -1.00158 |
| TCERG1L        | 0.026998   | -1.00158 |
| KERA           | 0.0525957  | -1.00158 |



|                 |            |          |
|-----------------|------------|----------|
| ZFP622          | 0.0810358  | -1.00159 |
| 2310047M15RIK   | 0.0520385  | -1.0016  |
| A730027E01RIK   | 0.0658517  | -1.00162 |
| PTGDR           | 0.0146057  | -1.00163 |
| PRH1            | 0.0472379  | -1.00164 |
| NLRP9A          | 0.0205701  | -1.00165 |
| RIMS3           | 0.0366441  | -1.00168 |
| G630052O08RIK   | 0.0453283  | -1.00173 |
| IFI204          | 0.0567854  | -1.00173 |
| LOC100041004    | 0.0335521  | -1.00174 |
| RFK             | 0.0432338  | -1.00174 |
| ZDHHC11         | 0.057448   | -1.00181 |
| CAR14           | 0.0812771  | -1.00181 |
| CYP2B13         | 0.00182142 | -1.00182 |
| DNM             | 0.0296006  | -1.00183 |
| GPRIN2          | 0.0635644  | -1.00184 |
| E130208E03RIK   | 0.017247   | -1.00187 |
| SCL0004025.1_69 | 0.018761   | -1.00187 |
| B930050E02RIK   | 0.0216181  | -1.00189 |
| 2010309E21RIK   | 0.0371141  | -1.0019  |
| PIGN            | 0.0701049  | -1.00197 |
| U46068          | 0.0189419  | -1.00198 |
| DONSON          | 0.0348318  | -1.002   |
| GIYD2           | 0.0362636  | -1.00201 |
| 1700123A16RIK   | 0.0492109  | -1.00201 |
| SLC6A7          | 0.0245851  | -1.00202 |
| CDKN2AIP        | 0.0233069  | -1.00203 |
| OLFR1028        | 0.0613231  | -1.00205 |
| SCL0001065.1_54 | 0.0282062  | -1.00206 |
| EG668225        | 0.0469332  | -1.00207 |
| TMEM91          | 0.0503948  | -1.00207 |
| DFFA            | 0.025785   | -1.0021  |
| CD69            | 0.0489509  | -1.0021  |
| COPS8           | 0.0709171  | -1.0021  |
| DPYSL5          | 0.0846452  | -1.0021  |
| LOC100046143    | 0.0660332  | -1.00211 |
| 2310040G07RIK   | 0.0315785  | -1.00213 |
| KIF1C           | 0.0427098  | -1.00215 |
| B3GALT5         | 0.0569464  | -1.00216 |
| PPP1R1B         | 0.0196519  | -1.00217 |
| 4930415J05RIK   | 0.0790308  | -1.00217 |
| SNAI1           | 0.0723436  | -1.00219 |
| GPR65           | 0.0336277  | -1.00221 |
| LOC671947       | 0.0533954  | -1.00222 |
| LOC237036       | 0.0140262  | -1.00225 |
| LOC232867       | 0.017327   | -1.00226 |
| 1700021K10RIK   | 0.0678401  | -1.00228 |
| 2210008F06RIK   | 0.0472159  | -1.00229 |
| SCL0001533.1_63 | 0.0474199  | -1.0023  |
| KCNK7           | 0.0594473  | -1.00233 |
| GYG             | 0.0425249  | -1.00234 |
| IL3             | 0.0729855  | -1.00236 |
| 2410170E21RIK   | 0.0408102  | -1.00238 |
| PIF1            | 0.0491158  | -1.00239 |
| SAA2            | 0.0158293  | -1.0024  |
| HK3             | 0.0797608  | -1.00244 |
| AGTR1B          | 0.0836302  | -1.00245 |
| LOC100044622    | 0.028787   | -1.00246 |

|                 |            |          |
|-----------------|------------|----------|
| CMYA5           | 0.053989   | -1.00246 |
| IQCF3           | 0.0682596  | -1.00247 |
| FIGNL1          | 0.0317048  | -1.0025  |
| LOC666238       | 0.0826006  | -1.00252 |
| 3110035E14RIK   | 0.0155339  | -1.00253 |
| EHD2            | 0.0581141  | -1.00253 |
| CAMKK1          | 0.0774096  | -1.00254 |
| UBE2T           | 0.00940231 | -1.00255 |
| DSCR6           | 0.052738   | -1.00256 |
| 3830417A13RIK   | 0.0192539  | -1.00257 |
| RASL11A         | 0.0638924  | -1.00257 |
| IGF1            | 0.0344616  | -1.0026  |
| OLFR62          | 0.0145568  | -1.00262 |
| EPOR            | 0.0198604  | -1.00262 |
| OLFR69          | 0.0701869  | -1.00267 |
| LOC385510       | 0.0136444  | -1.00268 |
| CORO2A          | 0.0769585  | -1.00268 |
| OLFR419         | 0.0186551  | -1.00269 |
| LIFR            | 0.0800355  | -1.00269 |
| 1700101C01RIK   | 0.0016326  | -1.0027  |
| 3010026O09RIK   | 0.0406478  | -1.00272 |
| PRX             | 0.0492324  | -1.00273 |
| RAB26           | 0.0728712  | -1.00273 |
| SIPA1           | 0.0828029  | -1.00274 |
| RASEF           | 0.0678255  | -1.00276 |
| TULP2           | 0.0695096  | -1.00276 |
| ABHD1           | 0.0108938  | -1.00278 |
| IL28B           | 0.0345608  | -1.00278 |
| BHMT2           | 0.0784471  | -1.0028  |
| A430090E18RIK   | 0.0581724  | -1.00283 |
| CRF-R 2         | 0.0739322  | -1.00283 |
| KMO             | 0.0432445  | -1.00288 |
| 2410091C18RIK   | 0.0362637  | -1.00296 |
| AI118078        | 0.0721118  | -1.00296 |
| ZFP93           | 0.0142116  | -1.00302 |
| UROS            | 0.0724687  | -1.00302 |
| LIMD2           | 0.0375298  | -1.00305 |
| TMEM90A         | 0.0761661  | -1.00305 |
| TMEM25          | 0.0541001  | -1.00306 |
| CPT1C           | 0.03142    | -1.00307 |
| LHX2            | 0.0422517  | -1.00309 |
| COL5A2          | 0.034482   | -1.00312 |
| EAR4            | 0.0544469  | -1.00318 |
| FANCB           | 0.0774777  | -1.00318 |
| DIAP1           | 0.0836035  | -1.00319 |
| BTRC            | 0.0350831  | -1.00323 |
| D330038K10RIK   | 0.00851156 | -1.00324 |
| LRP11           | 0.0227904  | -1.00326 |
| TROAP           | 0.0305575  | -1.00326 |
| DPY19L4         | 0.048384   | -1.00328 |
| SCL0001912.1_11 | 0.0372051  | -1.00331 |
| BRUNOL4         | 0.0728682  | -1.00332 |
| TBC1D9B         | 0.0190188  | -1.00344 |
| GPR124          | 0.0572007  | -1.00345 |
| POLM            | 0.0618966  | -1.00345 |
| 1700013F07RIK   | 0.0637359  | -1.00346 |
| GSDMA1          | 0.0380512  | -1.00348 |
| CD40            | 0.0653881  | -1.0035  |

|                |             |          |
|----------------|-------------|----------|
| 5330421K23RIK  | 0.0543761   | -1.00351 |
| EG633285       | 0.00540971  | -1.00354 |
| SLC22A17       | 0.0469799   | -1.00355 |
| LOC382081      | 0.069297    | -1.00355 |
| A230074L19RIK  | 0.00109633  | -1.00358 |
| FAAH           | 0.0657661   | -1.00358 |
| 2410015C20RIK  | 0.032211    | -1.0036  |
| GZMK           | 0.0676124   | -1.0036  |
| BCORL1         | 0.00622623  | -1.00361 |
| LOC433632      | 0.0400874   | -1.00363 |
| VAMP1          | 0.0234327   | -1.00364 |
| B230380O10RIK  | 0.0376361   | -1.00364 |
| TMPRSS6        | 0.0100547   | -1.00366 |
| 2810021O14RIK  | 0.044996    | -1.00366 |
| AI314976       | 0.0840341   | -1.00367 |
| 2310033E01RIK  | 0.0627853   | -1.00369 |
| PGM2L1         | 0.077006    | -1.00372 |
| PFKFB2         | 0.0209589   | -1.00382 |
| PATZ1          | 0.0335604   | -1.00383 |
| TACR1          | 0.0593122   | -1.00383 |
| 4631416I11RIK  | 0.0133556   | -1.00384 |
| A330080J22RIK  | 0.0211025   | -1.00384 |
| RGS2           | 0.0400411   | -1.00384 |
| UHRF1          | 0.00543776  | -1.00386 |
| LOC385181      | 0.0841623   | -1.00387 |
| GRIA3          | 0.0335991   | -1.00389 |
| UBE2I          | 0.0385269   | -1.0039  |
| 4632412I06RIK  | 0.0579832   | -1.0039  |
| OLFR884        | 0.0252973   | -1.00395 |
| ZFP2           | 0.000410306 | -1.00397 |
| SCL000528.1_16 | 0.0559072   | -1.00397 |
| NLRP4F         | 0.00951122  | -1.00399 |
| CEP55          | 0.0658322   | -1.004   |
| 2210016F16RIK  | 0.0429925   | -1.00404 |
| D11MOH35       | 0.072346    | -1.00404 |
| EHBP1          | 0.00767278  | -1.00409 |
| B930095G15RIK  | 0.0665415   | -1.0041  |
| MSH2           | 0.0282744   | -1.00411 |
| ATP6V1G2       | 0.00288787  | -1.00412 |
| ZFP687         | 0.0177721   | -1.00412 |
| TM6SF1         | 0.0030104   | -1.00414 |
| WFDC5          | 0.0440692   | -1.00418 |
| NMI            | 0.0453977   | -1.0042  |
| SIGLEC1        | 0.0825011   | -1.00421 |
| CLIP3          | 0.019813    | -1.00423 |
| 5033413D22RIK  | 0.0586219   | -1.00423 |
| NLN            | 0.0145824   | -1.00424 |
| MCPH1          | 0.014332    | -1.00427 |
| PODXL2         | 0.0150544   | -1.00429 |
| C530028I08RIK  | 0.0253701   | -1.00429 |
| GVIN1          | 0.0790088   | -1.00429 |
| LOC385924      | 0.0849948   | -1.00429 |
| RWDD3          | 0.051419    | -1.00432 |
| 2610029J22RIK  | 0.0632126   | -1.00432 |
| NOD2           | 0.0628097   | -1.00433 |
| HADH           | 0.0751766   | -1.00434 |
| NRAP           | 0.0810172   | -1.00435 |
| RAD9           | 0.045742    | -1.0044  |

|               |            |          |
|---------------|------------|----------|
| LOC100044159  | 0.0848706  | -1.00446 |
| 2410006F04RIK | 0.0473073  | -1.00447 |
| BLOC1S3       | 0.0480845  | -1.00448 |
| FCRLS         | 0.00108504 | -1.00449 |
| FBLN7         | 0.0556283  | -1.00451 |
| RBM14         | 0.0585867  | -1.00451 |
| DOK2          | 0.00370521 | -1.00452 |
| EVI2A         | 0.0194381  | -1.00453 |
| MPG           | 0.082975   | -1.00454 |
| 3830430K15RIK | 0.0147839  | -1.00455 |
| NEK3          | 0.0239874  | -1.00455 |
| TSGA14        | 0.0208892  | -1.00457 |
| SLC28A1       | 0.0348946  | -1.00459 |
| DDEF2         | 0.0355586  | -1.00462 |
| USP30         | 0.0120784  | -1.00463 |
| A130010J15RIK | 0.0602016  | -1.00463 |
| MLXIPL        | 0.0701703  | -1.00467 |
| ASL           | 0.00445767 | -1.00471 |
| 4930444P10RIK | 0.0799874  | -1.00471 |
| PRODH         | 0.0351523  | -1.00473 |
| LOC381578     | 0.0105624  | -1.00474 |
| TMEM44        | 0.0182426  | -1.00474 |
| CEBPA         | 0.0190412  | -1.00474 |
| ZDHHC16       | 0.0585235  | -1.00475 |
| FFAR3         | 0.0673144  | -1.00477 |
| REC8          | 0.0576699  | -1.00481 |
| LOC237408     | 0.0665865  | -1.00484 |
| NCOA4         | 0.0389777  | -1.00485 |
| MARE          | 0.0531262  | -1.00486 |
| PLSCR2        | 0.00925641 | -1.00489 |
| 6430573D20RIK | 0.0248     | -1.0049  |
| ASB6          | 0.0658259  | -1.00492 |
| TRIM68        | 0.00584322 | -1.00494 |
| C630044O20RIK | 0.0134723  | -1.00494 |
| DPP9          | 0.0489475  | -1.00494 |
| LOC332300     | 0.0498712  | -1.00494 |
| MCTS2         | 0.0291896  | -1.00496 |
| TNFSF8        | 0.0597076  | -1.00496 |
| 9830002I17RIK | 0.0738461  | -1.00497 |
| RMND5B        | 0.0339619  | -1.00498 |
| NRXN3         | 0.0665742  | -1.00498 |
| 4833417A11RIK | 0.0117462  | -1.00499 |
| LOC277236     | 0.0673814  | -1.00499 |
| EVC           | 0.0306499  | -1.005   |
| EAR2          | 0.0383345  | -1.005   |
| IL4RA         | 0.0223625  | -1.00501 |
| 6430514E13RIK | 0.0397314  | -1.00503 |
| AIF1          | 0.0212502  | -1.00507 |
| GAL3ST1       | 0.0291347  | -1.00508 |
| TCFE2A        | 0.0127238  | -1.00513 |
| NXF7          | 0.0393786  | -1.00513 |
| ZFP429        | 0.0569567  | -1.00513 |
| 1810043G02RIK | 0.0843917  | -1.00514 |
| LOC100047339  | 0.00819254 | -1.00516 |
| ZC4H2         | 0.0221814  | -1.00517 |
| 2810032E02RIK | 0.0212948  | -1.00518 |
| LOC385849     | 0.00364505 | -1.00519 |
| KRT71         | 0.0709408  | -1.00519 |

|               |             |          |
|---------------|-------------|----------|
| PPP4R4        | 0.028568    | -1.00521 |
| 2410013I23RIK | 0.0473882   | -1.00521 |
| CCR5          | 0.0338468   | -1.00526 |
| D930028F11RIK | 0.0677413   | -1.00526 |
| SELPLG        | 0.0064493   | -1.0053  |
| MSLNL         | 0.0353496   | -1.0053  |
| SDSL          | 0.0663107   | -1.0053  |
| BC016201      | 0.0547854   | -1.00531 |
| LOC223653     | 0.0605503   | -1.00534 |
| CD86          | 0.0483666   | -1.00535 |
| TMEM132E      | 0.031178    | -1.00538 |
| INTS9         | 0.0429426   | -1.00538 |
| SLCO3A1       | 0.0151938   | -1.00539 |
| 1200015F23RIK | 0.0434091   | -1.0054  |
| MED22         | 0.00378528  | -1.00544 |
| ZFP235        | 0.00953325  | -1.00547 |
| PSMD5         | 0.0107133   | -1.00547 |
| MFAP4         | 0.0351705   | -1.00547 |
| G6PC3         | 0.0654842   | -1.00548 |
| CD97          | 0.0544319   | -1.0055  |
| CHD3          | 0.0107497   | -1.00552 |
| GGA1          | 0.0586497   | -1.00555 |
| 4732423C17RIK | 0.037923    | -1.00556 |
| 3010015F07RIK | 7.56E-05    | -1.00558 |
| NUDT13        | 0.0527344   | -1.00558 |
| ACRBP         | 0.0657771   | -1.00559 |
| 6330401K01RIK | 0.0340824   | -1.0056  |
| LOC211870     | 0.053169    | -1.00561 |
| 4833409F13RIK | 0.011365    | -1.00564 |
| CAMK2N2       | 0.0418512   | -1.00565 |
| PSMD9         | 0.0786826   | -1.00565 |
| TRIB1         | 0.0820336   | -1.00569 |
| CHST5         | 0.053225    | -1.00571 |
| INHA          | 0.00631626  | -1.00573 |
| 9030405D14RIK | 0.0830714   | -1.00573 |
| GNG13         | 0.0218948   | -1.00575 |
| A930039A15RIK | 0.0193853   | -1.00576 |
| MYO1B         | 0.0212566   | -1.00577 |
| WFIKKN1       | 0.0396171   | -1.00578 |
| A730054J21RIK | 0.00995751  | -1.00582 |
| PTPRU         | 0.0444238   | -1.00582 |
| LEFTY1        | 0.0841559   | -1.00584 |
| 4930431J19RIK | 0.0162783   | -1.00586 |
| EPB4.1L1      | 0.0770834   | -1.00588 |
| SCL000361.1_1 | 0.042639    | -1.0059  |
| MAPK12        | 0.0108788   | -1.00593 |
| RDH5          | 0.0833821   | -1.00593 |
| LOC100045971  | 0.0048475   | -1.00595 |
| TMEM189       | 0.0035448   | -1.00597 |
| MCOLN2        | 0.0812214   | -1.006   |
| FAM173B       | 0.008844    | -1.00603 |
| LOC100043313  | 0.010292    | -1.00604 |
| LPXN          | 0.00579448  | -1.00605 |
| CRSP3         | 0.00765288  | -1.00609 |
| A930001N09RIK | 0.0216196   | -1.00611 |
| ISOC2A        | 0.0567389   | -1.00611 |
| DNALC1        | 0.0589139   | -1.00611 |
| ZFP386        | 0.000849385 | -1.00613 |

|               |            |          |
|---------------|------------|----------|
| WNT4          | 0.0105039  | -1.00618 |
| WDR47         | 0.0330999  | -1.00618 |
| USF2          | 0.0293562  | -1.00621 |
| EG406223      | 0.0097052  | -1.00622 |
| FBXO31        | 0.00823823 | -1.00622 |
| LOC385256     | 0.0478386  | -1.00623 |
| FAIM2         | 0.0519895  | -1.00624 |
| SGOL2         | 0.00469818 | -1.00626 |
| ABHD3         | 0.0571697  | -1.00627 |
| ACOX3         | 0.0473169  | -1.00628 |
| IDUA          | 0.0383564  | -1.00632 |
| B230349N02RIK | 0.034607   | -1.00633 |
| C130032J12RIK | 0.0403738  | -1.00635 |
| MBD4          | 0.0543584  | -1.00638 |
| NOSIP         | 0.0492363  | -1.00639 |
| CDC42BPG      | 0.033092   | -1.00646 |
| PANK1         | 0.0552966  | -1.00646 |
| SCNN1G        | 0.0110689  | -1.0065  |
| RAB19         | 0.0285442  | -1.00651 |
| LIG1          | 0.0646636  | -1.00652 |
| 2410017P07RIK | 0.01269    | -1.00653 |
| TUSC1         | 0.0798861  | -1.00655 |
| KIFC3         | 0.0571116  | -1.00657 |
| HTRA3         | 0.0619624  | -1.00659 |
| GAS2L1        | 0.0565273  | -1.00662 |
| UPK2          | 0.067739   | -1.00663 |
| METAPL1       | 0.00452707 | -1.00664 |
| DYNC2H1       | 0.0131378  | -1.00668 |
| LOC100045439  | 0.00179357 | -1.00675 |
| LOC383561     | 0.0818662  | -1.00675 |
| ACAD10        | 0.0275404  | -1.00676 |
| EXOSC6        | 0.0370814  | -1.00676 |
| LOC100044774  | 0.0846993  | -1.00678 |
| SCRN2         | 2.35E-05   | -1.00681 |
| LOC100047603  | 0.0219977  | -1.00681 |
| KANK3         | 0.0111675  | -1.00682 |
| XRCC1         | 0.0187961  | -1.00682 |
| DUS3L         | 0.0560372  | -1.00685 |
| VPS26A        | 0.0317952  | -1.00687 |
| 1600012H06RIK | 0.0490748  | -1.00687 |
| SDCCAG3       | 0.0795278  | -1.00688 |
| APIP          | 0.0608627  | -1.00689 |
| SLC47A1       | 0.0652774  | -1.00689 |
| C1QTNF1       | 0.0386241  | -1.00692 |
| A630064P09RIK | 0.0723203  | -1.00692 |
| BC024868      | 0.0704379  | -1.00693 |
| 1700024G10RIK | 0.0124293  | -1.00695 |
| SLC2A13       | 0.00466454 | -1.00697 |
| DTX4          | 0.0777624  | -1.00697 |
| GREB1         | 0.00845036 | -1.00701 |
| LRSAM1        | 0.0162467  | -1.00701 |
| MRPL49        | 0.0167659  | -1.00703 |
| TLCD2         | 0.0172901  | -1.00703 |
| 1700009P17RIK | 0.0533772  | -1.00705 |
| CDC42EP5      | 0.0823912  | -1.00707 |
| CCDC125       | 0.0128102  | -1.00708 |
| SEMA4G        | 0.0361556  | -1.00709 |
| 6430598A04RIK | 0.0264559  | -1.0071  |

|                 |             |          |
|-----------------|-------------|----------|
| EG381438        | 0.00463489  | -1.00711 |
| PPM1M           | 0.0160327   | -1.00711 |
| SLC8A1          | 0.0450467   | -1.00711 |
| 5830457O10RIK   | 0.069929    | -1.00714 |
| AXIN2           | 0.0199486   | -1.00718 |
| 5730403M16RIK   | 0.0073737   | -1.00727 |
| TMCO3           | 0.00734753  | -1.00733 |
| ADARB1          | 0.0584929   | -1.00735 |
| PIK3AP1         | 0.0256613   | -1.00739 |
| H1FX            | 0.0768405   | -1.00743 |
| MAPK11          | 0.0339714   | -1.00745 |
| SH3GL2          | 0.00508497  | -1.0075  |
| SCL0003251.1_21 | 0.0156011   | -1.0075  |
| LY6G6D          | 0.0302654   | -1.00752 |
| SLC35E4         | 0.0386075   | -1.00759 |
| TMEM46          | 0.0284116   | -1.00762 |
| LOC385822       | 0.0468056   | -1.00763 |
| 3830406C13RIK   | 0.0419265   | -1.00765 |
| PROC            | 0.0310708   | -1.00771 |
| GLUL            | 0.0819956   | -1.00771 |
| 1110032E23RIK   | 0.0361533   | -1.00773 |
| FBXO8           | 0.0388057   | -1.00773 |
| GBP5            | 0.015175    | -1.00774 |
| CCDC84          | 0.0228101   | -1.00774 |
| 1300018I17RIK   | 0.0304534   | -1.00774 |
| LOC629763       | 0.0730944   | -1.00777 |
| KLHDC5          | 0.0367233   | -1.00785 |
| PCOLCE2         | 0.0430541   | -1.00787 |
| FAM110B         | 0.00254499  | -1.00788 |
| 6330407I18RIK   | 0.0219325   | -1.0079  |
| 9430015G10RIK   | 0.00972834  | -1.00794 |
| TMEM166         | 0.0749314   | -1.00797 |
| FMO1            | 0.0555716   | -1.00799 |
| NCDN            | 0.0227054   | -1.00801 |
| SFI1            | 0.0319386   | -1.00801 |
| SEPT1           | 0.0370178   | -1.00801 |
| CPA3            | 0.0510712   | -1.00801 |
| 2900093K20RIK   | 0.0794055   | -1.00802 |
| LOC100047915    | 0.0283359   | -1.00808 |
| RHOBTB2         | 0.0102445   | -1.00809 |
| 2510002D24RIK   | 0.0391508   | -1.00815 |
| TMTC4           | 0.0738975   | -1.00818 |
| 1190008K20RIK   | 0.043151    | -1.00822 |
| LY86            | 0.0256974   | -1.00827 |
| VPS41           | 0.0271802   | -1.00828 |
| GHDC            | 0.0132791   | -1.0083  |
| PFAS            | 0.012141    | -1.00835 |
| 9430030N17RIK   | 0.0129392   | -1.00835 |
| 2410004N11RIK   | 0.0396999   | -1.00837 |
| MFSD9           | 0.000204497 | -1.00838 |
| 9430077D24RIK   | 0.0802481   | -1.0084  |
| IL18            | 0.013271    | -1.00841 |
| NGFR            | 0.0469854   | -1.00842 |
| OAS1B           | 0.0827207   | -1.00842 |
| UNC13D          | 0.0381549   | -1.00843 |
| GNA12           | 0.0806536   | -1.00846 |
| TMEM101         | 0.0841479   | -1.00846 |
| A930008G19RIK   | 0.0489143   | -1.00849 |

|                 |             |          |
|-----------------|-------------|----------|
| KLHDC1          | 0.0559393   | -1.00849 |
| WNK4            | 0.00729891  | -1.00851 |
| CHRD            | 0.000948845 | -1.00852 |
| OSR2            | 0.016303    | -1.00853 |
| HOXC6           | 0.0111613   | -1.00854 |
| GNAZ            | 0.0242108   | -1.00854 |
| TLE2            | 0.0336811   | -1.00855 |
| SCL0002007.1_97 | 0.0604606   | -1.00856 |
| FUT10           | 0.0363889   | -1.00858 |
| MNS1            | 0.030907    | -1.00859 |
| 2700046G09RIK   | 0.000541071 | -1.0086  |
| FCGR2B          | 0.010071    | -1.0086  |
| C130052O15RIK   | 0.0601624   | -1.00861 |
| CD83            | 0.00137811  | -1.00866 |
| RFC3            | 0.0659895   | -1.00866 |
| FGFR3           | 0.0195985   | -1.00867 |
| SULT2B1         | 0.0524356   | -1.00867 |
| SCL000205.1_10  | 0.0235275   | -1.00868 |
| HGFAC           | 0.045832    | -1.00869 |
| ATXN7L3         | 0.0406024   | -1.00872 |
| 2210407N10RIK   | 0.0715055   | -1.00872 |
| AMDHD2          | 0.0767134   | -1.00872 |
| FRAG1           | 0.0417732   | -1.00873 |
| SENP7           | 0.0557891   | -1.00873 |
| LY6G6E          | 0.066342    | -1.00875 |
| DORZ1           | 0.043787    | -1.00878 |
| TSPAN1          | 0.0517669   | -1.00878 |
| FSD1            | 0.0102851   | -1.00883 |
| MGMT            | 0.0143925   | -1.00886 |
| UBXD7           | 0.0571094   | -1.00891 |
| GP49A           | 0.0102472   | -1.00892 |
| GIPC1           | 0.0135408   | -1.00899 |
| TACC1           | 0.0266933   | -1.00901 |
| CD53            | 0.0629515   | -1.00901 |
| 4732473B16RIK   | 0.0445526   | -1.00902 |
| 2610036L11RIK   | 0.0158633   | -1.00903 |
| ACSF3           | 0.018532    | -1.00904 |
| TUSC2           | 0.0441022   | -1.00904 |
| CTPS2           | 0.0422746   | -1.00906 |
| TAF6            | 0.0104991   | -1.00907 |
| MAGI1           | 0.0415505   | -1.00908 |
| SC5D            | 0.00623671  | -1.00913 |
| 2310045A20RIK   | 0.021635    | -1.00913 |
| DTX1            | 0.00733672  | -1.00918 |
| PACSIN3         | 0.0482874   | -1.00918 |
| MRRF            | 0.0575332   | -1.00919 |
| 3830402I07RIK   | 0.0791134   | -1.00919 |
| A530017D24RIK   | 0.0423559   | -1.00922 |
| B3GNT8          | 0.0769574   | -1.00925 |
| GGT1            | 0.0777809   | -1.00925 |
| ABCD1           | 0.0246762   | -1.00926 |
| U2AF1L4         | 0.0287279   | -1.00928 |
| ZFP821          | 0.0276017   | -1.00932 |
| 1810005K13RIK   | 0.0336107   | -1.00934 |
| AMIGO1          | 0.0256999   | -1.00937 |
| NME4            | 0.00112794  | -1.00939 |
| 2010001J22RIK   | 0.0588523   | -1.00945 |
| IL17RB          | 0.0367519   | -1.00948 |



|               |             |          |
|---------------|-------------|----------|
| BCL11A        | 0.0205223   | -1.00949 |
| FAM110A       | 0.0215866   | -1.00949 |
| ZMIZ2         | 0.0806788   | -1.00956 |
| BC053749      | 0.0100012   | -1.00957 |
| DUSP28        | 0.0285893   | -1.00962 |
| ANTXR2        | 0.0465693   | -1.00966 |
| 5730596K20RIK | 0.0149828   | -1.00968 |
| FBF1          | 0.0651587   | -1.00969 |
| NUMBL         | 0.0383882   | -1.0097  |
| LOC665047     | 0.059788    | -1.00971 |
| DECR1         | 0.0171272   | -1.00972 |
| ZMAT5         | 0.0226471   | -1.00974 |
| CARM1         | 0.0442542   | -1.00979 |
| ALDH1L1       | 0.00675116  | -1.0098  |
| MRC1          | 0.0357495   | -1.0098  |
| 6030495B01RIK | 0.051838    | -1.00982 |
| EMILIN2       | 0.0839604   | -1.00982 |
| 2210010N04RIK | 0.0465497   | -1.00984 |
| C330018D20RIK | 0.0431064   | -1.00988 |
| SPIRE2        | 0.048911    | -1.0099  |
| LRRC15        | 0.0776894   | -1.00991 |
| DBN1          | 0.0127045   | -1.00993 |
| PTDSS2        | 0.030653    | -1.00993 |
| C1QTNF4       | 0.0203419   | -1.00998 |
| 2310009E04RIK | 0.00259188  | -1.01    |
| BEX4          | 0.00582505  | -1.01003 |
| HSD17B11      | 0.0107736   | -1.01005 |
| TG737RPW      | 0.077176    | -1.01005 |
| LOC100046255  | 0.00124141  | -1.0101  |
| ITGA11        | 0.0531225   | -1.01011 |
| CLCN2         | 0.0654051   | -1.01011 |
| AP1S1         | 0.0813517   | -1.01018 |
| CHFR          | 0.0727206   | -1.01026 |
| E430002G05RIK | 0.0200192   | -1.01027 |
| COVA1         | 0.0209963   | -1.01027 |
| ZBP1          | 0.000972362 | -1.01029 |
| LOC100046796  | 0.0717256   | -1.01031 |
| LOC100043918  | 0.0124328   | -1.01032 |
| CDK10         | 0.0640889   | -1.01033 |
| GM166         | 0.00724107  | -1.01034 |
| ITGA10        | 0.0404899   | -1.01038 |
| POLG          | 0.0543617   | -1.01038 |
| EFNB2         | 0.0633168   | -1.0104  |
| BCL2L1        | 0.0783978   | -1.01041 |
| TMEM121       | 0.0191418   | -1.01043 |
| TBC1D8        | 0.0156058   | -1.01044 |
| MBD5          | 0.0572075   | -1.01044 |
| BC018371      | 0.0220071   | -1.01051 |
| PPP4C         | 0.00994662  | -1.01052 |
| TAF11         | 0.047991    | -1.01056 |
| H2-DMA        | 0.0162065   | -1.01057 |
| CELSR1        | 0.0425664   | -1.01058 |
| 2310005N01RIK | 0.0294581   | -1.01059 |
| NGEF          | 0.0767438   | -1.0106  |
| CD70          | 0.017257    | -1.01061 |
| MYO5C         | 0.0378443   | -1.01061 |
| ZFP119        | 0.0638179   | -1.01062 |
| 2510022D24RIK | 0.0812491   | -1.01063 |

|                 |             |          |
|-----------------|-------------|----------|
| LZIC            | 0.0425249   | -1.01068 |
| TMEM139         | 0.0458644   | -1.01068 |
| 9030420J04RIK   | 0.0524879   | -1.0107  |
| ACAA1B          | 0.0321418   | -1.01073 |
| TCEAL3          | 0.0718467   | -1.01073 |
| DDX11           | 0.0297075   | -1.01077 |
| FASTKD1         | 0.0307998   | -1.01079 |
| RTN2            | 0.0617829   | -1.01083 |
| 2810468N07RIK   | 0.0027565   | -1.01084 |
| STK36           | 0.000511176 | -1.01089 |
| FXYD2           | 0.0451511   | -1.01089 |
| AI464131        | 0.0437994   | -1.0109  |
| ATP6V0A1        | 0.0754412   | -1.01093 |
| CSF2RA          | 0.0580585   | -1.01095 |
| PEX16           | 0.0490865   | -1.01097 |
| ACN9            | 0.0732562   | -1.011   |
| FBXO36          | 0.0739506   | -1.011   |
| LOC100044257    | 0.0136856   | -1.01101 |
| ABAT            | 0.0265602   | -1.01101 |
| LOC100047937    | 0.0187894   | -1.01108 |
| 4933439C10RIK   | 0.0106065   | -1.01111 |
| AP4M1           | 0.0442321   | -1.01112 |
| NEURL           | 0.0620845   | -1.01114 |
| FRAT2           | 0.0703299   | -1.01116 |
| SAT2            | 0.0399778   | -1.01118 |
| BAG4            | 0.0673171   | -1.01118 |
| 2410187C16RIK   | 0.0187337   | -1.0112  |
| TOM1L1          | 0.00766484  | -1.01122 |
| HIST2H2BE       | 0.0295967   | -1.01122 |
| LOC384742       | 0.062324    | -1.01123 |
| 2610036D13RIK   | 0.0495632   | -1.01124 |
| GCDH            | 0.00274417  | -1.01125 |
| BC026585        | 0.0293585   | -1.01126 |
| TBC1D5          | 0.0192544   | -1.01134 |
| C430049K18RIK   | 0.0106912   | -1.01139 |
| TMCO6           | 0.0333187   | -1.01142 |
| E230027K01RIK   | 0.00847906  | -1.01147 |
| NFKBIE          | 0.0043852   | -1.01148 |
| 4930572J05RIK   | 0.0613021   | -1.0115  |
| SGSM3           | 0.0119143   | -1.01154 |
| RAB13           | 0.0533876   | -1.01155 |
| NQO2            | 0.00679495  | -1.0116  |
| TIRAP           | 0.00300945  | -1.0116  |
| SCL0004175.1_57 | 0.0518888   | -1.0116  |
| RASD1           | 0.0676027   | -1.01161 |
| LOC381150       | 0.0287179   | -1.01162 |
| LOC380947       | 0.00551855  | -1.01163 |
| TTYH2           | 0.0810621   | -1.01165 |
| RNF215          | 0.059178    | -1.01167 |
| PHTF1           | 0.0111389   | -1.01168 |
| GLIPR1          | 0.0557596   | -1.01168 |
| CMA2            | 0.0763823   | -1.01169 |
| RARG            | 0.0324013   | -1.0117  |
| B930045J24RIK   | 0.00130684  | -1.01173 |
| SRPX            | 0.043492    | -1.01174 |
| FCHSD1          | 0.0448989   | -1.01176 |
| VASP            | 0.00478341  | -1.01177 |
| LOC237459       | 0.041644    | -1.0118  |

|                    |             |          |
|--------------------|-------------|----------|
| GTSE1              | 0.040403    | -1.01182 |
| OSM                | 0.057857    | -1.01184 |
| 2900024C23RIK      | 0.0352817   | -1.01189 |
| NTHL1              | 0.0278326   | -1.0119  |
| B930004C15RIK      | 0.0699705   | -1.01191 |
| LOC383100          | 0.0365538   | -1.01192 |
| TBC1D7             | 0.00734334  | -1.01194 |
| NCKAP1L            | 0.0198928   | -1.01195 |
| ABHD8              | 0.0270497   | -1.01195 |
| SEPHS2             | 0.0828257   | -1.012   |
| SCL0002297.1_21    | 0.0521988   | -1.01201 |
| LST1               | 0.0499484   | -1.01204 |
| BMP3               | 0.0835603   | -1.01204 |
| SLC25A14           | 0.0116885   | -1.01205 |
| POLI               | 0.0702754   | -1.0121  |
| ABI3BP             | 0.0384024   | -1.01211 |
| DYNC1LI2           | 0.041525    | -1.01211 |
| 1700054E11RIK      | 0.0460244   | -1.01213 |
| BC024561           | 0.0640622   | -1.01213 |
| LIME1              | 0.0792932   | -1.01213 |
| FGF13              | 0.0514224   | -1.01214 |
| FAM122B            | 0.0518406   | -1.01219 |
| RASSF6             | 0.000318917 | -1.01223 |
| CLEC4N             | 0.000731188 | -1.01224 |
| SPNB1              | 0.0814565   | -1.01224 |
| DOCK1              | 0.0347249   | -1.01228 |
| BC044804           | 0.0641638   | -1.01229 |
| MCF2L              | 0.0499996   | -1.01233 |
| ZFP771             | 0.0701774   | -1.01233 |
| IFT88              | 0.0530896   | -1.01234 |
| ICT1               | 0.0640621   | -1.01235 |
| D11LGP2E           | 0.0115901   | -1.01236 |
| SFRS16             | 0.0337088   | -1.01237 |
| 9030607L17RIK      | 0.0540259   | -1.01241 |
| TOX                | 0.0776078   | -1.01241 |
| CMA1               | 0.00928649  | -1.01244 |
| OTTMUSG00000001070 | 0.00933236  | -1.01244 |
| AKR1C12            | 0.0670177   | -1.01244 |
| ATHL1              | 0.0527245   | -1.01247 |
| B230107H12RIK      | 0.0132033   | -1.01248 |
| IDS                | 0.0559161   | -1.01253 |
| HDAC10             | 0.0234886   | -1.01254 |
| IPP                | 0.0196219   | -1.01256 |
| PAIP1              | 0.069202    | -1.01269 |
| CDKL2              | 0.0429192   | -1.01273 |
| IKBKE              | 0.0815742   | -1.01278 |
| CXX1A              | 0.0307814   | -1.0128  |
| SLC29A4            | 0.0259995   | -1.01283 |
| PRTN3              | 0.0667024   | -1.01284 |
| B4GALT6            | 0.0731655   | -1.01286 |
| 1700071K01RIK      | 0.0219301   | -1.01287 |
| LOC100044576       | 0.0437057   | -1.01287 |
| 9130404D08RIK      | 0.0107694   | -1.01288 |
| WDSUB1             | 0.0812727   | -1.01288 |
| SYRADB             | 0.0819791   | -1.01288 |
| NUP133             | 0.0116386   | -1.01289 |
| PIK3R3             | 0.00180616  | -1.01293 |
| HERPUD2            | 0.0595367   | -1.01295 |

|               |            |          |
|---------------|------------|----------|
| PKIG          | 0.00657028 | -1.01298 |
| SLC4A3        | 0.0155771  | -1.01301 |
| MEA1          | 0.0675563  | -1.01301 |
| KLC1          | 0.0166912  | -1.01303 |
| EG620143      | 0.0736396  | -1.01306 |
| TSHZ2         | 0.00932092 | -1.01309 |
| LAYN          | 0.0468768  | -1.01318 |
| LOC100048436  | 0.00591551 | -1.0132  |
| VILL          | 0.0300661  | -1.01321 |
| GINS2         | 0.0278011  | -1.01323 |
| LOC669001     | 0.0541225  | -1.01324 |
| STAC          | 0.02862    | -1.01327 |
| HCR           | 0.0413445  | -1.01329 |
| ETV6          | 0.0787892  | -1.01329 |
| COMMD9        | 0.0543208  | -1.01332 |
| GLB1          | 0.0179377  | -1.01333 |
| ADAMTS12      | 0.00446756 | -1.01339 |
| ZFP521        | 0.023455   | -1.01341 |
| DNASE1L1      | 0.0316855  | -1.01342 |
| MAPK3         | 0.0747636  | -1.01346 |
| SBNO2         | 0.0531874  | -1.01348 |
| TMEM107       | 0.0322202  | -1.0135  |
| ATL3          | 0.013255   | -1.01356 |
| OGN           | 0.0467484  | -1.01361 |
| TMEM158       | 0.0829521  | -1.01361 |
| 1700007P14RIK | 0.0560106  | -1.01362 |
| NEO1          | 0.0221694  | -1.01363 |
| FAHD2A        | 0.00317534 | -1.01364 |
| ETV1          | 0.00789581 | -1.01368 |
| ALDH3B1       | 0.0153508  | -1.01368 |
| BC023744      | 0.00984464 | -1.01372 |
| NDUFB2        | 0.0376325  | -1.01374 |
| SLC25A10      | 0.0137634  | -1.01376 |
| TMEM117       | 0.064729   | -1.01376 |
| CGN           | 0.0806414  | -1.01387 |
| 1700065O13RIK | 0.0643379  | -1.01388 |
| INPP5E        | 0.0669261  | -1.01389 |
| COPG2         | 0.018437   | -1.0139  |
| EG624138      | 0.0201679  | -1.01393 |
| TMEM141       | 0.00490613 | -1.01394 |
| EG329521      | 0.0513062  | -1.01395 |
| RAC3          | 0.01116    | -1.01401 |
| UGT1A6A       | 0.0132303  | -1.01404 |
| MAP4K2        | 0.0458454  | -1.01406 |
| KREMEN1       | 0.0422038  | -1.01408 |
| PTPN12        | 0.00855202 | -1.01409 |
| GTRGEO22      | 0.0344282  | -1.01415 |
| APOBEC3       | 0.0220411  | -1.01416 |
| D4WSU114E     | 0.0500785  | -1.01417 |
| ARRB2         | 0.0317582  | -1.01418 |
| LTBR          | 0.0557738  | -1.01418 |
| NSMAF         | 0.00282077 | -1.01419 |
| CXX1C         | 0.0591013  | -1.01424 |
| LOC619973     | 0.0757043  | -1.01424 |
| BAHD1         | 0.0256984  | -1.01425 |
| TLR4          | 0.0622033  | -1.01425 |
| 9530081N05RIK | 0.076632   | -1.01426 |
| H2-DMB2       | 0.0652212  | -1.01432 |

|               |            |          |
|---------------|------------|----------|
| UCN2          | 0.020915   | -1.01435 |
| SNAI3         | 0.0182185  | -1.01437 |
| SP140         | 0.0109908  | -1.01443 |
| PIK3R2        | 0.0502412  | -1.01444 |
| 2900006A08RIK | 0.0222098  | -1.01453 |
| TWIST2        | 0.070795   | -1.01459 |
| SORD          | 0.00332965 | -1.01461 |
| PPS           | 0.0081687  | -1.01464 |
| 4732456N10RIK | 0.0216289  | -1.01474 |
| 1190002F15RIK | 0.0107003  | -1.01475 |
| 1110059E24RIK | 0.0479784  | -1.01476 |
| ADH5          | 0.0228036  | -1.01486 |
| CCDC114       | 0.0143688  | -1.01487 |
| 1110067B18RIK | 0.0434421  | -1.01487 |
| ACSS2         | 0.0722633  | -1.01488 |
| TFPT          | 0.0743532  | -1.0149  |
| CAR11         | 0.0768206  | -1.01492 |
| RAP2A         | 0.0012407  | -1.01494 |
| THG1L         | 0.0547374  | -1.01495 |
| ARFRP1        | 0.0485309  | -1.01496 |
| ADCY7         | 0.0678165  | -1.01502 |
| C030014I23RIK | 0.0733514  | -1.01507 |
| LOC100044411  | 0.0167906  | -1.01509 |
| POU2AF1       | 0.0143324  | -1.01511 |
| PBX2          | 0.0352608  | -1.01512 |
| FRRS1         | 0.0680693  | -1.01512 |
| NIPSNAP3A     | 0.0840544  | -1.01516 |
| LOC215098     | 0.0783266  | -1.01518 |
| CHAF1B        | 0.0152028  | -1.0152  |
| INO80C        | 0.0419818  | -1.01521 |
| TREX1         | 0.0132412  | -1.01522 |
| NAPA          | 0.0263426  | -1.01526 |
| PRKAG2        | 0.00157828 | -1.01529 |
| NUDT2         | 0.037891   | -1.01529 |
| MPST          | 0.00179764 | -1.01532 |
| CMTM4         | 0.015576   | -1.01532 |
| IMMP2L        | 0.0399928  | -1.01533 |
| EG240327      | 0.0470597  | -1.01535 |
| 5330401P04RIK | 0.0565532  | -1.01548 |
| 5330431N19RIK | 0.035872   | -1.01551 |
| ZFP316        | 0.0644596  | -1.01552 |
| 1500004F05RIK | 0.0674716  | -1.01552 |
| NFKBID        | 0.041102   | -1.01554 |
| 6230425C21RIK | 0.0695537  | -1.01557 |
| ARL2BP        | 0.0597418  | -1.01558 |
| KCTD20        | 0.00456676 | -1.0156  |
| B230112P13RIK | 0.00767653 | -1.01567 |
| PDCD6IP       | 0.0640967  | -1.0157  |
| MICAL1        | 0.00487962 | -1.01572 |
| EAR11         | 0.049612   | -1.01572 |
| SCNN1A        | 0.00809991 | -1.01573 |
| RAB3IP        | 0.0481219  | -1.01573 |
| FBN1          | 0.0522698  | -1.01574 |
| 2310007F21RIK | 0.0140677  | -1.01578 |
| 4930402H24RIK | 0.0453866  | -1.01579 |
| LOC236604     | 0.0634404  | -1.01579 |
| ITM2A         | 0.0337057  | -1.01583 |
| LARP6         | 0.018749   | -1.01584 |

|                |            |          |
|----------------|------------|----------|
| 1700029P11RIK  | 0.00165341 | -1.01592 |
| COG4           | 0.0385386  | -1.016   |
| SOX13          | 0.0693809  | -1.016   |
| AP1G2          | 0.0335031  | -1.01602 |
| SAMD10         | 0.010176   | -1.01605 |
| 1600029O10RIK  | 0.0472837  | -1.01605 |
| TIAM2          | 0.0814219  | -1.01607 |
| ARRDC1         | 0.0557164  | -1.01608 |
| TMEM54         | 0.0477083  | -1.0161  |
| CDKN2B         | 0.0622805  | -1.0161  |
| GTF3C1         | 0.0115659  | -1.01611 |
| 2010003O02RIK  | 0.0144825  | -1.01614 |
| 1500015G18RIK  | 0.0496479  | -1.01621 |
| STMN1          | 0.0800169  | -1.01625 |
| NHLRC1         | 0.00759876 | -1.01629 |
| ACO1           | 0.0764968  | -1.01629 |
| ASPSCR1        | 0.0573053  | -1.01635 |
| MAPKAPK3       | 0.0574112  | -1.01638 |
| KCNIP3         | 0.0823206  | -1.01638 |
| DLM1-PENDING   | 0.0111579  | -1.01645 |
| IPAS           | 0.0837199  | -1.0165  |
| TMEM53         | 0.0673593  | -1.01658 |
| TMEM184A       | 0.0714011  | -1.01658 |
| RGS1           | 0.0184683  | -1.01662 |
| MRAS           | 0.0572927  | -1.01662 |
| IFT140         | 0.00272856 | -1.01664 |
| FSCN1          | 0.0212439  | -1.01668 |
| SLC46A1        | 0.0237985  | -1.01669 |
| CML1           | 0.0612225  | -1.0167  |
| NCAPD3         | 0.0680524  | -1.01674 |
| FSTL           | 0.00230971 | -1.01675 |
| GANC           | 0.069123   | -1.01677 |
| HC             | 0.00311107 | -1.01684 |
| PCMTD2         | 0.0596849  | -1.01684 |
| IFNB1          | 0.0619214  | -1.01686 |
| GPS2           | 0.0653646  | -1.01689 |
| 2810037O22RIK  | 0.0654055  | -1.01696 |
| ACTR1B         | 0.0465175  | -1.01697 |
| ETV5           | 0.0611206  | -1.01699 |
| LOC225927      | 0.0768941  | -1.01699 |
| SCL000416.1_19 | 0.0119166  | -1.01701 |
| ACP2           | 0.0535433  | -1.01702 |
| GATAD1         | 0.0824893  | -1.01705 |
| 2610029K11RIK  | 0.0132938  | -1.01707 |
| C030003A18RIK  | 0.00925017 | -1.01708 |
| KIFC2          | 0.00148004 | -1.01708 |
| ABCG4          | 0.010585   | -1.0171  |
| MCPT4          | 0.0388655  | -1.01714 |
| CD164L2        | 0.0797798  | -1.01714 |
| LOC100045680   | 0.0276332  | -1.01715 |
| SPNB3          | 0.030813   | -1.01716 |
| SQRDL          | 0.074825   | -1.01728 |
| B230339H12RIK  | 0.00367888 | -1.01729 |
| BEX2           | 0.0252394  | -1.01729 |
| CALCOCO1       | 0.0276955  | -1.01732 |
| POPDC2         | 0.00824498 | -1.01736 |
| GSTT2          | 0.00785553 | -1.01742 |
| HEXA           | 0.0199611  | -1.01743 |

|                    |            |          |
|--------------------|------------|----------|
| ENSMUSG00000043795 | 0.0493397  | -1.01743 |
| FBXL17             | 0.0763788  | -1.01744 |
| TTC5               | 0.00835426 | -1.01752 |
| MRPS28             | 0.0114211  | -1.01752 |
| 2010002N04RIK      | 0.0749428  | -1.01755 |
| 1700021C14RIK      | 0.00592209 | -1.0176  |
| LOC100046844       | 0.0100126  | -1.01767 |
| 1110029I05RIK      | 0.0392584  | -1.01767 |
| PPM1K              | 0.0761031  | -1.01771 |
| CRIPT              | 0.0666177  | -1.01772 |
| 2310004N24RIK      | 0.0654011  | -1.01774 |
| WRN                | 0.0186451  | -1.01781 |
| GLI3               | 0.0395454  | -1.01783 |
| RABL5              | 0.0124505  | -1.01789 |
| PAK4               | 0.0780871  | -1.01795 |
| RTKN               | 0.00403409 | -1.01798 |
| LOC209281          | 0.0461857  | -1.01799 |
| ADAM15             | 0.0620903  | -1.01799 |
| MSC                | 0.0261805  | -1.01804 |
| DNASE2A            | 0.0324597  | -1.01804 |
| 9030624G23RIK      | 0.0163827  | -1.01811 |
| A330042I21RIK      | 0.00523355 | -1.01815 |
| 5330417C22RIK      | 0.0666138  | -1.01816 |
| IL3RA              | 0.0334283  | -1.01817 |
| FZD10              | 0.0513188  | -1.01818 |
| CD248              | 0.0676994  | -1.01819 |
| C920006O11RIK      | 0.0162747  | -1.01823 |
| DNAJC12            | 0.00461553 | -1.01824 |
| SCD2               | 0.0200752  | -1.01829 |
| SART1              | 0.0380907  | -1.01831 |
| EG245190           | 0.0481048  | -1.01833 |
| PCMT1              | 0.0535741  | -1.01835 |
| CEP63              | 0.0353482  | -1.01839 |
| BCL11B             | 0.0730894  | -1.01845 |
| PCP2               | 0.0325564  | -1.01848 |
| ARAF               | 0.0127384  | -1.01853 |
| 2310022M17RIK      | 0.0493626  | -1.01864 |
| ARHGAP27           | 0.0215687  | -1.01867 |
| 2310003C23RIK      | 0.0278978  | -1.01871 |
| NOTCH3             | 0.080403   | -1.01871 |
| UBE2E3             | 0.0763952  | -1.01872 |
| 4833421E05RIK      | 0.0502848  | -1.01876 |
| EPB4.1L4A          | 0.0129297  | -1.01878 |
| VAR52              | 0.0254008  | -1.01878 |
| GFOD2              | 0.0329331  | -1.0188  |
| D030070L09RIK      | 0.070656   | -1.01881 |
| CITED1             | 0.0462598  | -1.01886 |
| CTTN               | 0.00208712 | -1.01889 |
| 8430410A17RIK      | 0.0225786  | -1.01891 |
| ADCY6              | 0.0392831  | -1.01893 |
| TOMM34             | 0.0709075  | -1.019   |
| 1110008L16RIK      | 0.0415121  | -1.01903 |
| IGFBP6             | 5.23E-05   | -1.01911 |
| ALDH16A1           | 0.0790339  | -1.01911 |
| RPS4Y2             | 0.0044031  | -1.0192  |
| MXD4               | 0.0661213  | -1.01923 |
| RAB1B              | 0.00653641 | -1.01926 |
| AAAS               | 0.025128   | -1.01928 |

|               |            |          |
|---------------|------------|----------|
| FLAD1         | 0.0269929  | -1.01934 |
| D230046H12RIK | 0.0506802  | -1.0194  |
| ZFP467        | 0.00261295 | -1.01943 |
| 2610301G19RIK | 0.031054   | -1.01948 |
| 2810001G20RIK | 0.0333915  | -1.01952 |
| ST3GAL3       | 0.0187859  | -1.01955 |
| RTN4          | 0.0677145  | -1.01956 |
| PPA2          | 0.0648272  | -1.0196  |
| WDR22         | 0.0179103  | -1.01961 |
| 1700113I22RIK | 0.062917   | -1.01973 |
| FAM100B       | 0.00647803 | -1.01976 |
| INTS7         | 0.0280151  | -1.01984 |
| FADS2         | 0.0290938  | -1.01984 |
| KATNA1        | 0.0225958  | -1.01985 |
| DNAHC11       | 0.0161966  | -1.01986 |
| CCDC132       | 0.0363193  | -1.01986 |
| TPM3          | 0.0376479  | -1.01986 |
| D430028G21RIK | 0.0232438  | -1.01996 |
| PLA1A         | 0.0370953  | -1.01999 |
| ZMYM3         | 0.0804524  | -1.02    |
| NUDT22        | 0.0823062  | -1.02    |
| OLFM1         | 0.0023292  | -1.02001 |
| NR1H2         | 0.049974   | -1.02007 |
| DHX35         | 0.0216284  | -1.02009 |
| AMN           | 0.0601942  | -1.0201  |
| ABCC5         | 0.0295591  | -1.02012 |
| APLP1         | 0.0265708  | -1.02016 |
| LOC383308     | 0.0083704  | -1.02023 |
| 8430432M10RIK | 0.00869848 | -1.02024 |
| CYHR1         | 0.0373519  | -1.02027 |
| FUK           | 0.0172164  | -1.0203  |
| PHC1          | 0.0345955  | -1.0203  |
| HECTD3        | 0.0188571  | -1.02033 |
| A2LD1         | 0.0541718  | -1.02037 |
| AK2           | 0.0666729  | -1.02038 |
| VAV2          | 0.0214161  | -1.02045 |
| PRSS12        | 0.0368346  | -1.02049 |
| SEPHS1        | 0.0440424  | -1.02052 |
| TGFB1         | 0.0054419  | -1.02058 |
| PLTP          | 0.016675   | -1.02062 |
| FZD2          | 0.0416737  | -1.02064 |
| 2610207P08RIK | 0.0746243  | -1.02064 |
| PPP1R9A       | 0.0715339  | -1.02068 |
| IPO8          | 0.0319888  | -1.02069 |
| CNIH          | 0.00296224 | -1.02071 |
| CKLF          | 0.0173995  | -1.02072 |
| CENTG3        | 0.0426932  | -1.02086 |
| SCG3          | 0.0126211  | -1.02088 |
| DUSP19        | 0.0355715  | -1.02089 |
| TIMM44        | 0.0590023  | -1.02091 |
| EML3          | 0.0327602  | -1.021   |
| 5830409B07RIK | 0.00532597 | -1.02103 |
| 2810405K02RIK | 0.0122727  | -1.02106 |
| COL1A2        | 0.0549995  | -1.0211  |
| RHEBL1        | 0.026088   | -1.02115 |
| GM1673        | 0.00200172 | -1.0212  |
| PPIH          | 0.0225958  | -1.02127 |
| HMCN1         | 0.00839389 | -1.02131 |



|               |             |          |
|---------------|-------------|----------|
| TSPAN6        | 0.00566074  | -1.02142 |
| MX1           | 0.00955435  | -1.02149 |
| 1500009L16RIK | 0.0564091   | -1.02151 |
| GNPTAB        | 0.0300711   | -1.02161 |
| CCDC28B       | 0.046496    | -1.02164 |
| FNBP1         | 0.0601251   | -1.02165 |
| GM106         | 0.0126363   | -1.02166 |
| ACPL2         | 0.0240197   | -1.02168 |
| BAHCC1        | 0.0616923   | -1.02168 |
| A530050D06RIK | 0.0229904   | -1.02176 |
| PYCRL         | 0.0400274   | -1.0218  |
| NUDT9         | 0.0021588   | -1.02182 |
| 6030429G01RIK | 0.0612751   | -1.02188 |
| 2310001H17RIK | 0.0181231   | -1.02196 |
| BBS9          | 0.0296938   | -1.02196 |
| LOC385632     | 0.0295377   | -1.022   |
| HDDC2         | 0.0263664   | -1.02203 |
| 2310067B10RIK | 0.0597575   | -1.02209 |
| GAS8          | 0.0169205   | -1.02213 |
| AI413582      | 0.0600941   | -1.02215 |
| CHPT1         | 0.0314133   | -1.02222 |
| SNX12         | 0.00774983  | -1.02232 |
| ASCC1         | 0.0227499   | -1.02232 |
| SLC27A1       | 0.0820692   | -1.02234 |
| COG1          | 0.0271128   | -1.02235 |
| AHCY          | 0.0170986   | -1.02241 |
| PRR12         | 0.0810204   | -1.02241 |
| IKBKG         | 0.0137861   | -1.02243 |
| TBCD          | 0.0293814   | -1.02244 |
| PRKCA         | 0.0223863   | -1.0226  |
| CYP2J9        | 0.0282253   | -1.02265 |
| DYRK1B        | 0.0535663   | -1.02265 |
| CDK9          | 0.0342479   | -1.02275 |
| XPC           | 0.0212565   | -1.02279 |
| HEPH          | 0.03273     | -1.0228  |
| FAM116B       | 0.0327943   | -1.02282 |
| B130019G13RIK | 0.0646622   | -1.02288 |
| DDB2          | 0.0398269   | -1.02289 |
| LOC381501     | 0.0490117   | -1.02292 |
| 5330438D12RIK | 0.0773141   | -1.02308 |
| IL17RC        | 0.0566609   | -1.0231  |
| A630072M18RIK | 0.030123    | -1.02315 |
| NIT2          | 0.0368617   | -1.02318 |
| NRADD         | 0.0399411   | -1.0232  |
| NUMA1         | 0.043381    | -1.02322 |
| LOC382691     | 0.000507643 | -1.02324 |
| 6330549D23RIK | 0.00359638  | -1.02325 |
| 2210011G09RIK | 0.0199981   | -1.02329 |
| CCL19         | 0.00484491  | -1.02331 |
| LSM2          | 0.0728882   | -1.02341 |
| DDHD2         | 0.0119765   | -1.02342 |
| IGSF10        | 0.0232085   | -1.02342 |
| UBE2L6        | 0.00497013  | -1.02349 |
| B230373P09RIK | 0.0261427   | -1.02351 |
|               | 4.93E+26    | -1.02354 |
| LOC381996     | 0.0350252   | -1.02363 |
| FGFR1         | 0.069173    | -1.02364 |
| SURF1         | 0.0179154   | -1.02377 |

|               |            |          |
|---------------|------------|----------|
| LOC382096     | 0.0752945  | -1.02378 |
| PPFIBP2       | 0.0538631  | -1.02383 |
| BICC1         | 0.0240798  | -1.02388 |
| TMEM40        | 0.0271698  | -1.02394 |
| EG633570      | 0.0769337  | -1.02396 |
| ATP6V1G1      | 0.0296359  | -1.024   |
| CREB3L4       | 0.0717111  | -1.024   |
| CBX7          | 0.0422653  | -1.02401 |
| ARHGEF1       | 0.0379516  | -1.02403 |
| CTNBL1        | 0.0617633  | -1.02403 |
| LOC382707     | 0.0508746  | -1.02405 |
| OASL1         | 0.00406919 | -1.02418 |
| SLC25A45      | 0.00909804 | -1.02419 |
| CACNB3        | 0.00682008 | -1.02436 |
| 9530027K23RIK | 0.0505058  | -1.02437 |
| A730017D01RIK | 0.0233638  | -1.02439 |
| EIF2B1        | 0.0190522  | -1.02449 |
| ABCA7         | 0.0526738  | -1.02451 |
| ZFP704        | 0.0634885  | -1.02452 |
| 2610204M08RIK | 0.00402606 | -1.02454 |
| LYZ2          | 0.060435   | -1.02454 |
| ADAR          | 0.0323368  | -1.02455 |
| 9030624J02RIK | 0.0263322  | -1.02464 |
| 2610208M17RIK | 0.0344145  | -1.02465 |
| ATG10         | 0.0677734  | -1.02473 |
| C1QC          | 0.0415296  | -1.02474 |
| C130027E04RIK | 0.0672027  | -1.02474 |
| RNF113A2      | 0.0227389  | -1.02477 |
| ELK3          | 0.0662114  | -1.02481 |
| DDX5          | 0.0120787  | -1.02482 |
| PML           | 0.0468859  | -1.02484 |
| EMID1         | 0.0443149  | -1.02485 |
| 1300011L04RIK | 0.00183632 | -1.02492 |
| 2310009B15RIK | 0.0740415  | -1.02494 |
| IL33          | 0.0496044  | -1.02496 |
| MAP3K6        | 0.0375463  | -1.025   |
| TWF2          | 0.0470734  | -1.02507 |
| LMTK2         | 0.0736966  | -1.02508 |
| DALRD3        | 0.027972   | -1.02513 |
| SLC9A3R2      | 0.0757237  | -1.02515 |
| 4930533K18RIK | 0.0764402  | -1.02516 |
| ZFP710        | 0.00605418 | -1.02519 |
| CD1D1         | 0.00432292 | -1.02521 |
| SCRIB         | 0.0196628  | -1.02525 |
| FMNL3         | 0.0666773  | -1.02525 |
| MMP23         | 0.0127915  | -1.02529 |
| PPIL3         | 0.0494528  | -1.0254  |
| TBL1XR1       | 0.0165506  | -1.02545 |
| 1810013B01RIK | 0.0208122  | -1.02557 |
| TRIM34        | 0.0465309  | -1.02558 |
| LRRC51        | 0.0614631  | -1.02562 |
| TSHZ3         | 0.0748075  | -1.02563 |
| PLCD1         | 0.0534646  | -1.0257  |
| NELF          | 0.0815464  | -1.02574 |
| CTSF          | 0.00435732 | -1.02576 |
| TBC1D25       | 0.0318869  | -1.02599 |
| UBL4          | 0.0229614  | -1.026   |
| RETSAT        | 0.0294405  | -1.02603 |

|                 |             |          |
|-----------------|-------------|----------|
| LOC100047260    | 0.0397752   | -1.02604 |
| ATP5E           | 0.0599656   | -1.02604 |
| MBTPS1          | 0.0329938   | -1.02608 |
| WIPF3           | 0.0353166   | -1.02611 |
| ADAMTS7         | 0.0508918   | -1.02624 |
| 1200011O22RIK   | 0.0824099   | -1.02628 |
| 2010110K16RIK   | 0.000772221 | -1.02635 |
| RAB7L1          | 0.00319061  | -1.02637 |
| HRSP12          | 0.0285349   | -1.02642 |
| D16H22S680E     | 0.0260082   | -1.02648 |
| SNURF           | 0.025807    | -1.0265  |
| TNFRSF18        | 0.0207804   | -1.02653 |
| SCL0003651.1_17 | 0.0202536   | -1.02656 |
| CEP164          | 0.00430198  | -1.02663 |
| TMEM218         | 0.0674019   | -1.02663 |
| ACSBG1          | 0.0404607   | -1.02675 |
| LOC380706       | 0.0542997   | -1.02682 |
| DGUOK           | 0.0575985   | -1.02685 |
| BC064033        | 0.05695     | -1.02686 |
| BTBD6           | 0.0803856   | -1.02687 |
| DACT2           | 0.07133     | -1.02689 |
| GPR137          | 0.078218    | -1.02695 |
| CCHCR1          | 0.0452862   | -1.02706 |
| DCXR            | 0.019519    | -1.02722 |
| TRP53INP2       | 0.0558645   | -1.02725 |
| D130064L03RIK   | 0.00494691  | -1.02734 |
| HIST2H2AA1      | 0.0400679   | -1.02738 |
| 2610003J06RIK   | 0.078641    | -1.02739 |
| CTBP2           | 0.0440784   | -1.02746 |
| LOC639086       | 0.023032    | -1.02758 |
| HDAC6           | 0.0249422   | -1.0276  |
| HDC             | 0.0302342   | -1.02761 |
| NDUFB10         | 0.0594969   | -1.02762 |
| CENPT           | 0.0270181   | -1.02763 |
| FBXL20          | 0.0350956   | -1.02768 |
| ATP6V1C2        | 0.0652458   | -1.02775 |
| CCDC12          | 0.0330275   | -1.02805 |
| PRKAG1          | 0.0033944   | -1.0281  |
| PTGIS           | 0.0082062   | -1.02822 |
| CCDC5           | 0.0184293   | -1.0283  |
| SLC2A4          | 0.0230944   | -1.02831 |
| VPS26B          | 0.0656348   | -1.02836 |
| CADPS2          | 0.00704653  | -1.02846 |
| FCGR4           | 0.0435917   | -1.02866 |
| GMCL1           | 0.051655    | -1.02872 |
| EIF4B           | 0.06724     | -1.02873 |
| RFFL            | 0.00736591  | -1.02881 |
| CASZ1           | 0.0131219   | -1.02885 |
| A930026I22RIK   | 0.0324214   | -1.02886 |
| SEPT9           | 0.0377271   | -1.0289  |
| D930048N14RIK   | 0.0114191   | -1.02893 |
| SMPDL3A         | 0.0655732   | -1.02893 |
| WDR60           | 0.0189628   | -1.02896 |
| ATF3            | 0.0232068   | -1.02899 |
| TNFSF12-TNFSF13 | 0.00602897  | -1.02904 |
| FLII            | 0.00330068  | -1.02905 |
| MPI             | 0.081723    | -1.02905 |
| TRIM26          | 0.0321285   | -1.02909 |

|               |             |          |
|---------------|-------------|----------|
| 3110013H01RIK | 0.0571769   | -1.02917 |
| LOC329575     | 0.0829585   | -1.02921 |
| MAX           | 0.0673307   | -1.02933 |
| BRD9          | 0.0756251   | -1.02935 |
| MYG1          | 0.00576531  | -1.02939 |
| SEC14L1       | 0.0141715   | -1.02946 |
| CAV2          | 0.028176    | -1.02946 |
| RABEP2        | 0.0821091   | -1.02953 |
| EFCAB4A       | 0.0355027   | -1.02958 |
| LYNX1         | 0.00714412  | -1.02961 |
| CCRK          | 0.0622536   | -1.02966 |
| MYCBPAP       | 0.00173758  | -1.02971 |
| 2310079N02RIK | 0.0218586   | -1.02977 |
| PADI1         | 0.0831618   | -1.0299  |
| AA536749      | 0.0330949   | -1.02993 |
| 4121402D02RIK | 0.00740039  | -1.02997 |
| LGSN          | 0.00942537  | -1.02998 |
| PFKM          | 0.0236621   | -1.03012 |
| NR2F6         | 0.0664703   | -1.03015 |
| LSR           | 0.0027173   | -1.03016 |
| ANG           | 0.0449049   | -1.03016 |
| TXLNA         | 0.0746073   | -1.03023 |
| NIT1          | 0.0325051   | -1.03032 |
| P2RX4         | 0.00561353  | -1.03043 |
| MCCC1         | 0.0700127   | -1.03043 |
| 2610524H06RIK | 0.00047628  | -1.03045 |
| 0610037D15RIK | 0.00541473  | -1.03048 |
| DEXI          | 0.0748524   | -1.0305  |
| SIN3B         | 0.0619192   | -1.0307  |
| BC051227      | 0.0392786   | -1.03071 |
| PALM          | 0.0123886   | -1.03074 |
| ZFHX3         | 0.0512131   | -1.03075 |
| GM684         | 0.00323392  | -1.03078 |
| 2010111I01RIK | 0.0168876   | -1.03084 |
| 2510008P16RIK | 0.0616829   | -1.03089 |
| 1600016N20RIK | 0.076047    | -1.03091 |
| CCNDBP1       | 0.0139241   | -1.031   |
| SMOC1         | 0.00872926  | -1.03102 |
| LOC230896     | 0.0117198   | -1.03109 |
| 1190005F20RIK | 0.015015    | -1.03116 |
| TSPYL3        | 0.000966025 | -1.0312  |
| RMND1         | 0.061021    | -1.03122 |
| NME7          | 0.0624147   | -1.03142 |
| ATP1B1        | 0.0397456   | -1.03144 |
| ESRRA         | 0.0249476   | -1.03149 |
| RFTN2         | 0.0387162   | -1.0315  |
| INPP5F        | 0.0815395   | -1.0315  |
| ZKSCAN17      | 0.0365209   | -1.03154 |
| D630036H09RIK | 0.0399754   | -1.03154 |
| PI16          | 0.0715417   | -1.03157 |
| LOC383706     | 0.0525698   | -1.03159 |
| COL1A1        | 0.00793719  | -1.03167 |
| CH25H         | 0.0822669   | -1.03177 |
| GOLGA7        | 0.0179303   | -1.0318  |
| HPCAL1        | 0.032204    | -1.03185 |
| ACADS         | 0.0688272   | -1.03186 |
| MXRA8         | 0.0102819   | -1.03188 |
| RNASEH2A      | 0.0233461   | -1.03188 |

|               |             |          |
|---------------|-------------|----------|
| C030003D03RIK | 0.0543368   | -1.03194 |
| LOC674706     | 0.0728427   | -1.03226 |
| ZCCHC8        | 0.0223965   | -1.03227 |
| NTNG1         | 0.0781099   | -1.03228 |
| MRPL27        | 0.00123343  | -1.03235 |
| RNF135        | 0.0558358   | -1.03248 |
| MRPL4         | 0.0169447   | -1.03265 |
| FHOD1         | 0.0189383   | -1.03265 |
| 5430437P03RIK | 0.019087    | -1.0327  |
| HOMER2        | 0.0573289   | -1.03273 |
| GPX7          | 0.00256887  | -1.03279 |
| WBP1          | 0.00493846  | -1.03288 |
| PTMS          | 0.0684174   | -1.03293 |
| MAPRE2        | 0.0371923   | -1.03298 |
| TST           | 0.00884068  | -1.03313 |
| 1190005N23RIK | 0.0132485   | -1.03319 |
| SSH3          | 0.0485161   | -1.0333  |
| CTXN1         | 0.00131473  | -1.03332 |
| RBM47         | 0.0348065   | -1.03335 |
| ZFHX2         | 0.0133915   | -1.03337 |
| CRYL1         | 0.0514845   | -1.03338 |
| UBE2Q1        | 0.0717682   | -1.03341 |
| ZCCHC18       | 0.0504445   | -1.03344 |
| GUSB          | 0.050433    | -1.03348 |
| MEN1          | 0.0245823   | -1.03358 |
| ORAI1         | 0.0829096   | -1.03377 |
| TSC22D4       | 0.0643575   | -1.03388 |
| 2310021P13RIK | 0.00178817  | -1.03396 |
| ARHGEF16      | 0.0428511   | -1.03398 |
| WDR6          | 0.019884    | -1.03399 |
| TPD52L1       | 0.0684481   | -1.03406 |
| CPXM1         | 0.0458631   | -1.03407 |
| UBXN6         | 0.0217666   | -1.03412 |
| IAH1          | 0.00202541  | -1.03417 |
| LOC100045019  | 0.0790236   | -1.0343  |
| EG245297      | 0.0218455   | -1.03434 |
| ASB13         | 0.0425337   | -1.03439 |
| LAD1          | 0.00789714  | -1.03444 |
| SLC29A3       | 0.0177259   | -1.03461 |
| LOC217602     | 0.0764588   | -1.03462 |
| MANBA         | 0.0501192   | -1.03485 |
| OLFML3        | 0.0111416   | -1.03489 |
| 0610009B22RIK | 0.0310938   | -1.03493 |
| BLMH          | 0.0456187   | -1.03494 |
| PPT1          | 0.0016431   | -1.03519 |
| OPLAH         | 0.0200742   | -1.03521 |
| PCBD2         | 0.0111907   | -1.03534 |
| MARCH2        | 0.0781715   | -1.03554 |
| H2-T10        | 0.000912068 | -1.03555 |
| ATP13A2       | 0.0513016   | -1.03564 |
| C1S           | 0.000127628 | -1.03569 |
| RNUXA         | 0.0156955   | -1.03577 |
| AP2A2         | 0.0364197   | -1.0358  |
| CCDC80        | 0.016842    | -1.03584 |
| AUP1          | 0.0431825   | -1.03585 |
| SNN           | 0.00151066  | -1.03592 |
| RAB4A         | 0.0130303   | -1.03594 |
| MLP           | 0.0152525   | -1.03602 |

|               |            |          |
|---------------|------------|----------|
| RNF4          | 0.0849241  | -1.03603 |
| DOCK6         | 0.0127812  | -1.03606 |
| STRN4         | 0.0357056  | -1.03608 |
| PNPLA1        | 0.00365119 | -1.0362  |
| ENTPD2        | 0.0190361  | -1.03626 |
| IFI35         | 0.038908   | -1.03627 |
| MCM4          | 0.08131    | -1.03633 |
| B4GALT1       | 0.0190671  | -1.03634 |
| GM561         | 0.061687   | -1.03634 |
| SLC39A4       | 0.0828091  | -1.03636 |
| NUB1          | 0.0309688  | -1.03637 |
| BC018462      | 0.081919   | -1.03637 |
| ZFP787        | 0.0182081  | -1.0364  |
| MLKL          | 0.0268911  | -1.0364  |
| SHD           | 0.0141424  | -1.03642 |
| NFATC4        | 0.02461    | -1.03656 |
| BCKDK         | 0.0195662  | -1.0366  |
| 1200016B10RIK | 0.00477529 | -1.03665 |
| LOC100043919  | 0.0335792  | -1.03666 |
| B3GNT1        | 0.0687679  | -1.03668 |
| LOC383125     | 0.0587046  | -1.03669 |
| D12ERTD553E   | 0.0117687  | -1.0367  |
| ZFP672        | 0.0118153  | -1.0367  |
| CLCA3         | 0.00376904 | -1.03673 |
| LETMD1        | 0.00533903 | -1.03677 |
| PIN4          | 0.00398112 | -1.03677 |
| MAPK8IP1      | 0.0219324  | -1.03683 |
| ERCC2         | 0.00133606 | -1.03685 |
| 2610307O08RIK | 0.0201238  | -1.03692 |
| LOC669658     | 0.012754   | -1.03693 |
| INSL6         | 0.01011    | -1.03695 |
| RCE1          | 0.0127496  | -1.03704 |
| MED25         | 0.0511166  | -1.03706 |
| CHURC1        | 0.0135835  | -1.03724 |
| WNK2          | 0.00162923 | -1.03727 |
| 1110012L19RIK | 0.0201462  | -1.03734 |
| ADD1          | 0.0298727  | -1.03734 |
| 0610011F06RIK | 0.00207604 | -1.03736 |
| FAM171A2      | 0.0138621  | -1.0375  |
| CRAMP1L       | 0.0610683  | -1.03754 |
| RAP1GAP       | 0.0333192  | -1.03759 |
| LMAN2L        | 0.015774   | -1.03763 |
| USP3          | 0.0138451  | -1.03765 |
| LGALS4        | 0.0359426  | -1.03768 |
| SMARCC2       | 0.0628575  | -1.03769 |
| CTSA          | 0.0694735  | -1.03779 |
| TMEM41A       | 0.0195747  | -1.0378  |
| DPT           | 0.0178893  | -1.0379  |
| PEX5          | 0.0809533  | -1.0379  |
| LOC383775     | 0.0148689  | -1.03799 |
| LANCL1        | 0.00283905 | -1.03801 |
| DYNC2LI1      | 0.0507559  | -1.03818 |
| CBX6          | 0.0799539  | -1.03818 |
| 1810014F10RIK | 0.0610605  | -1.03828 |
| 4930455C21RIK | 0.0129266  | -1.03832 |
| IFI30         | 0.0620912  | -1.03834 |
| GPT1          | 0.00823698 | -1.03841 |
| ANKRD50       | 0.0624217  | -1.03841 |

|                 |             |          |
|-----------------|-------------|----------|
| EFNA4           | 0.000294684 | -1.03848 |
| PLSCR1          | 0.0498745   | -1.0385  |
| PRKAR2B         | 0.0844562   | -1.03857 |
| PRDX3           | 0.060224    | -1.03858 |
| STX1A           | 0.0346222   | -1.03866 |
| TMEM19          | 0.00798294  | -1.03872 |
| ACADL           | 0.0218752   | -1.0389  |
| MRPL9           | 0.0127516   | -1.03898 |
| LOC100046039    | 0.04268     | -1.03898 |
| WIF1            | 0.0615928   | -1.03899 |
| ST13            | 0.0489967   | -1.03906 |
| PROM2           | 0.0149958   | -1.03918 |
| LOC100047486    | 0.0796562   | -1.03932 |
| FAM13B          | 0.0582688   | -1.03933 |
| PYGB            | 0.0380427   | -1.03935 |
| A730063M14RIK   | 0.0820032   | -1.03935 |
| SCNN1B          | 0.0226792   | -1.03951 |
| CAPSL           | 0.0284158   | -1.03956 |
| INTS10          | 0.0744602   | -1.03966 |
| PDE6D           | 0.0147952   | -1.03972 |
| F8A             | 0.0175435   | -1.03974 |
| TMEM179B        | 0.0673561   | -1.03978 |
| 2010007H12RIK   | 0.0163744   | -1.03989 |
| STAP2           | 0.0179647   | -1.03993 |
| 1110059G02RIK   | 0.0389489   | -1.03995 |
| STAT1           | 0.0316277   | -1.03997 |
| AI987712        | 0.021944    | -1.04006 |
| TUBB2B          | 0.0440916   | -1.04006 |
| LSM3            | 0.0245307   | -1.04011 |
| PLA2G7          | 0.0170152   | -1.04034 |
| UBE2V1          | 0.00280897  | -1.04037 |
| LOC100044430    | 0.0122912   | -1.04037 |
| MRPL11          | 0.0128226   | -1.04046 |
| PALMD           | 0.0803531   | -1.04046 |
| LOC627317       | 0.0225909   | -1.04055 |
| RABL2A          | 0.00648849  | -1.04072 |
| PLD1            | 0.0506713   | -1.04073 |
| DDB1            | 0.00847257  | -1.04078 |
| RBM43           | 0.000644414 | -1.04078 |
| 1110032A13RIK   | 0.0741695   | -1.04081 |
| LOC381215       | 0.0024697   | -1.04085 |
| 4933436C20RIK   | 0.0245402   | -1.04086 |
| CANT1           | 0.0156746   | -1.04087 |
| DLL1            | 0.0204336   | -1.04089 |
| ITGA8           | 0.0752634   | -1.04089 |
| SCL0001419.1_32 | 0.0741845   | -1.04108 |
| SLC44A1         | 0.0375569   | -1.04109 |
| LOC667269       | 0.0108941   | -1.04112 |
| GTPBP3          | 0.016267    | -1.04137 |
| BCL2L11         | 0.0492013   | -1.04138 |
| HNRPLL          | 0.0613109   | -1.04138 |
| ALDH3A2         | 0.0773993   | -1.04149 |
| 4931406C07RIK   | 0.0117593   | -1.04152 |
| NT5C3L          | 0.0255876   | -1.04154 |
| BRF1            | 0.0493322   | -1.04183 |
| LOC381889       | 0.00385262  | -1.04185 |
| RGS16           | 0.0445082   | -1.04185 |
| IGBP1           | 0.0483142   | -1.04193 |

|               |             |          |
|---------------|-------------|----------|
| D030051N19RIK | 0.0465771   | -1.04195 |
| GSTZ1         | 0.0346228   | -1.04196 |
| ZFP523        | 0.0395109   | -1.04198 |
| TNFRSF11B     | 0.0761753   | -1.04208 |
| SMPDL3B       | 0.0191986   | -1.04217 |
| CLIP2         | 0.0393517   | -1.0422  |
| KHDRBS1       | 0.000575607 | -1.04236 |
| TTC39A        | 0.0697792   | -1.04238 |
| TM7SF3        | 0.0516379   | -1.0425  |
| KIF5C         | 0.0109829   | -1.04262 |
| CDKN1C        | 0.0389144   | -1.04266 |
| RELL1         | 0.0731685   | -1.04267 |
| SLC25A20      | 0.0472647   | -1.04278 |
| FBLN2         | 0.0378878   | -1.04287 |
| PYGO2         | 0.0318337   | -1.04289 |
| NAV1          | 0.0479408   | -1.04298 |
| MAEA          | 0.0197133   | -1.04299 |
| GTF3A         | 0.0120076   | -1.04301 |
| 1110012D08RIK | 0.0247234   | -1.04301 |
| F630025I20RIK | 0.0403938   | -1.04309 |
| LOXL1         | 0.00103047  | -1.04315 |
| LOC100043126  | 0.0553967   | -1.04319 |
| TGM1          | 0.0493207   | -1.04339 |
| COL8A1        | 0.0705681   | -1.04354 |
| VPS37D        | 0.0628093   | -1.04361 |
| ECM1          | 0.0605029   | -1.04367 |
| 2010011I20RIK | 0.0660547   | -1.0437  |
| MGAT4B        | 0.0837839   | -1.04374 |
| PGLS          | 0.0169574   | -1.04384 |
| 2310040A07RIK | 0.0302199   | -1.0439  |
| MEGF8         | 0.0438644   | -1.04406 |
| CCND3         | 0.0575981   | -1.04413 |
| LOC100040353  | 0.0707177   | -1.04419 |
| SMARCA1       | 0.0743466   | -1.04419 |
| HAGHL         | 0.013017    | -1.0443  |
| SYNGR2        | 0.061285    | -1.0443  |
| EG384179      | 0.0629909   | -1.04431 |
| LARP1         | 0.0641995   | -1.04451 |
| RBM38         | 0.022868    | -1.04497 |
| LOC667776     | 0.0284065   | -1.04498 |
| LOC100043822  | 0.0261008   | -1.04527 |
| 9430016H08RIK | 0.00940127  | -1.0455  |
| ARF5          | 0.0452054   | -1.0455  |
| EPS15         | 0.0566656   | -1.04551 |
| BCL2A1B       | 0.0764635   | -1.04551 |
| RASGRP4       | 0.0486662   | -1.04553 |
| SSBP4         | 0.0506778   | -1.04557 |
| SIRT3         | 0.0114705   | -1.04558 |
| UGT1A6B       | 0.0365477   | -1.04561 |
| ECHS1         | 0.0425714   | -1.04576 |
| BC006779      | 0.0143017   | -1.04584 |
| H2-DMB1       | 0.0161293   | -1.04586 |
| KCNMB1        | 0.0272232   | -1.04609 |
| LOC545208     | 0.0281361   | -1.04628 |
| AI451557      | 0.00335483  | -1.04636 |
| C1QB          | 0.0557399   | -1.04636 |
| CDK2          | 0.00813795  | -1.04637 |
| MRPL48        | 0.0191885   | -1.04644 |



|               |             |          |
|---------------|-------------|----------|
| LCMT1         | 0.0153068   | -1.04656 |
| MAPK14        | 0.014809    | -1.04657 |
| ILVBL         | 0.00551202  | -1.04669 |
| EIF4E3        | 0.0623201   | -1.04695 |
| TMEM79        | 0.00777767  | -1.04706 |
| LOC333331     | 0.0301329   | -1.04712 |
| HES1          | 0.0293397   | -1.04715 |
| NID1          | 0.0312      | -1.04723 |
| FAM110C       | 0.0220113   | -1.04732 |
| MACROD1       | 0.0450449   | -1.04732 |
| GIPC2         | 0.0486914   | -1.04769 |
| PQLC3         | 0.0490101   | -1.04777 |
| 2510010F15RIK | 0.0367448   | -1.04784 |
| OSMR          | 0.0116328   | -1.04786 |
| RABL4         | 0.0122241   | -1.04805 |
| NDUFB5        | 0.00705662  | -1.04835 |
| FAM125A       | 0.0532755   | -1.04842 |
| LOC225897     | 0.0619763   | -1.04843 |
| B930041F14RIK | 0.0489505   | -1.04845 |
| LOC100048376  | 0.0129577   | -1.04849 |
| LONP2         | 0.0435231   | -1.04861 |
| 4930504E06RIK | 0.0564841   | -1.04863 |
| ZDHHC12       | 0.0443049   | -1.04866 |
| TEF           | 0.0808091   | -1.04868 |
| GSTT1         | 0.0384821   | -1.04872 |
| LOC668837     | 0.0687501   | -1.04876 |
| AP4S1         | 0.0218484   | -1.04882 |
| D930015E06RIK | 0.00638198  | -1.04884 |
| LAGE3         | 0.0115757   | -1.04884 |
| DLK2          | 0.0462941   | -1.04888 |
| NDN           | 0.00126984  | -1.04919 |
| RSU1          | 0.0748825   | -1.04936 |
| ROBLD3        | 0.00710707  | -1.0495  |
| CRYAB         | 0.0725008   | -1.04954 |
| H2-EB1        | 0.0261962   | -1.04955 |
| PLCB3         | 0.00431778  | -1.04969 |
| 1810020D17RIK | 0.0166925   | -1.0498  |
| TRAPPC3       | 0.0126148   | -1.04983 |
| COMMD10       | 0.0160886   | -1.04988 |
| NDUFS2        | 0.0294122   | -1.05001 |
| RAB4B         | 0.0809031   | -1.0501  |
| 2310045N01RIK | 0.0128856   | -1.05012 |
| CHD8          | 0.0783674   | -1.05014 |
| TANK          | 0.000165494 | -1.05033 |
| PLCG2         | 0.0284466   | -1.05033 |
| 2900057K09RIK | 0.033169    | -1.0504  |
| D930017K21RIK | 0.0141869   | -1.05047 |
| 2300009A05RIK | 0.0146943   | -1.05048 |
| YIPF1         | 0.0524456   | -1.05049 |
| CTSZ          | 0.0650015   | -1.05049 |
| ENPP5         | 0.0141142   | -1.05063 |
| SHISA2        | 0.00764579  | -1.05087 |
| TCF3          | 0.001111    | -1.05096 |
| PEF1          | 0.0743775   | -1.05097 |
| LOC621823     | 0.000753484 | -1.05099 |
| 2410008K03RIK | 0.0803929   | -1.051   |
| D130059O18RIK | 0.0298416   | -1.05102 |
| AI316807      | 0.0463136   | -1.0511  |

|                 |             |          |
|-----------------|-------------|----------|
| FANCE           | 0.00766749  | -1.05111 |
| CTNNBIP1        | 0.00842236  | -1.05116 |
| TTC13           | 0.0764819   | -1.05132 |
| LOC383826       | 0.0300531   | -1.05138 |
| KAT2A           | 0.0168812   | -1.05143 |
| PGCP            | 0.034285    | -1.05146 |
| TAPBP           | 0.022803    | -1.05156 |
| ZFP313          | 0.0708339   | -1.05157 |
| ZNHIT1          | 0.00759211  | -1.05161 |
| SCL0001647.1_23 | 0.00200582  | -1.05163 |
| COL6A3          | 0.00757365  | -1.05176 |
| HTATIP2         | 0.0420955   | -1.05179 |
| BAD             | 0.0125914   | -1.0518  |
| DDX58           | 0.00792892  | -1.05193 |
| RNF167          | 0.00348813  | -1.05199 |
| LOC100042179    | 0.000596803 | -1.05205 |
| SEMA4A          | 0.0289301   | -1.05211 |
| IFIT2           | 0.0408376   | -1.05221 |
| B3GNTL1         | 0.0454579   | -1.05245 |
| 5031439G07RIK   | 0.0395233   | -1.05251 |
| WASF1           | 0.0277503   | -1.05266 |
| C2CD3           | 0.00391702  | -1.05268 |
| TMEM55A         | 0.0463219   | -1.0527  |
| RHOG            | 0.0550397   | -1.05273 |
| TMEM134         | 0.0057973   | -1.05298 |
| TMEM98          | 0.0418772   | -1.05304 |
| PLEK2           | 0.0743312   | -1.0534  |
| COL4A6          | 0.0697455   | -1.05354 |
| LOC100044702    | 0.00638826  | -1.05359 |
| LPL             | 0.00175125  | -1.05365 |
| LOC100044221    | 0.0207282   | -1.05369 |
| PPAP2C          | 0.00645621  | -1.05403 |
| H2-Q6           | 0.0373387   | -1.05414 |
| IGF2R           | 0.0817895   | -1.05422 |
| D930046M13RIK   | 0.0734949   | -1.05425 |
| ZFP664          | 0.0209904   | -1.05427 |
| TPSAB1          | 0.046161    | -1.05433 |
| SAMHD1          | 0.044674    | -1.05445 |
| AKR1B8          | 0.0298513   | -1.05451 |
| LOC100045612    | 0.051305    | -1.05463 |
| NKD2            | 0.0195417   | -1.05481 |
| MTVR2           | 0.0510435   | -1.05507 |
| GSTP2           | 0.0668905   | -1.0551  |
| PSMD10          | 0.02511     | -1.05518 |
| POLD4           | 0.0363471   | -1.05525 |
| RDM1            | 0.0454188   | -1.05542 |
| VIM             | 0.0691575   | -1.05543 |
| 2810423O19RIK   | 0.0744923   | -1.05544 |
| LOC100048301    | 0.000359065 | -1.05551 |
| ARPC1A          | 0.0695778   | -1.05569 |
| NDUFB9          | 0.0122151   | -1.05581 |
| SSBP3           | 0.0815292   | -1.05582 |
| CYP4F13         | 0.00805794  | -1.05599 |
| LPCAT3          | 0.0216184   | -1.05608 |
| MRPS16          | 0.0292974   | -1.05608 |
| MTCH2           | 0.0420926   | -1.05659 |
| THEM5           | 0.0294923   | -1.0567  |
| 2410025L10RIK   | 0.0124849   | -1.05694 |

|                 |             |          |
|-----------------|-------------|----------|
| 1110058L19RIK   | 0.0199695   | -1.05698 |
| TMEM29          | 0.00354523  | -1.05723 |
| PLEC1           | 0.0224994   | -1.05728 |
| TOMM40L         | 0.00606784  | -1.05733 |
| GDI1            | 0.0454373   | -1.05749 |
| PLD3            | 0.0364891   | -1.05776 |
| TAP1            | 0.00772912  | -1.05778 |
| CTSK            | 0.0135162   | -1.05824 |
| SOSTDC1         | 0.0847459   | -1.05826 |
| ADCK5           | 0.00809635  | -1.05827 |
| DHX58           | 0.002365    | -1.05828 |
| IRF2BP1         | 0.0753683   | -1.05842 |
| 5930416I19RIK   | 0.0566674   | -1.05845 |
| PJA1            | 0.0205653   | -1.05847 |
| BCAS1           | 0.0123201   | -1.05849 |
| PAOX            | 0.00920195  | -1.05855 |
| LOC100045280    | 0.00455432  | -1.05867 |
| ZFP579          | 0.00316146  | -1.05869 |
| ERBB2           | 0.00867587  | -1.05899 |
| STAT5A          | 0.00996975  | -1.05911 |
| CMTM6           | 0.0766755   | -1.05924 |
| AU022508        | 0.0608846   | -1.05931 |
| MAPBPIP-PENDING | 0.0294346   | -1.05936 |
| KCTD10          | 0.0583994   | -1.05936 |
| ALG14           | 0.0336551   | -1.05939 |
| HBP1            | 0.0286148   | -1.05945 |
| TSPAN17         | 0.0449069   | -1.05956 |
| LOC545487       | 0.0183907   | -1.05962 |
| ABHD11          | 0.0419518   | -1.06015 |
| PRKACA          | 0.0139169   | -1.06027 |
| BACE1           | 0.00242574  | -1.0603  |
| GDPD1           | 0.0263152   | -1.0604  |
| COPS5           | 0.0451265   | -1.06045 |
| SLC24A6         | 0.0350183   | -1.06056 |
| 4933428A15RIK   | 0.0777461   | -1.06066 |
| ELOF1           | 0.071232    | -1.06076 |
| TAZ             | 0.0197499   | -1.06077 |
| CIRBP           | 0.000105524 | -1.06084 |
| MMP15           | 0.063826    | -1.06086 |
| D14ERTD449E     | 0.0314008   | -1.06106 |
| SPNA2           | 0.0121456   | -1.06111 |
| SENP3           | 0.070992    | -1.06116 |
| DEF6            | 0.00513652  | -1.06122 |
| EG433865        | 0.0127388   | -1.06149 |
| 3110009E18RIK   | 0.0375234   | -1.06195 |
| 2410003K15RIK   | 0.0442033   | -1.06196 |
| SIDT2           | 0.0158187   | -1.06201 |
| TCN2            | 0.0541166   | -1.06229 |
| BIK             | 0.023377    | -1.06283 |
| IGFALS          | 0.0624434   | -1.06283 |
| PACS1           | 0.078018    | -1.06289 |
| SMARCA2         | 0.0423969   | -1.06293 |
| D9ERTD392E      | 0.0293024   | -1.06294 |
| EPS8            | 0.0231065   | -1.06313 |
| ZFP282          | 0.044592    | -1.0633  |
| STX4A           | 0.00197006  | -1.06334 |
| HMG20B          | 0.0428421   | -1.06348 |
| TMEM106C        | 0.0773326   | -1.06369 |

|                  |            |          |
|------------------|------------|----------|
| RNASET2          | 0.0088851  | -1.06387 |
| KLC4             | 0.010489   | -1.06425 |
| HSPE1            | 0.00715351 | -1.06444 |
| CPT2             | 0.03199    | -1.06444 |
| MANBAL           | 0.0565236  | -1.06454 |
| 1500001M20RIK    | 0.00251964 | -1.06457 |
| SEPP1            | 0.0548988  | -1.06461 |
| MRPL34           | 0.0060495  | -1.06475 |
| MFAP2            | 0.0234605  | -1.0649  |
| RIT1             | 0.0742751  | -1.06494 |
| PKP3             | 0.0195939  | -1.06498 |
| RNF114           | 0.0565906  | -1.06511 |
| TRIP6            | 0.0104478  | -1.06515 |
| YKT6             | 0.0773385  | -1.06532 |
| ACBD4            | 0.0450313  | -1.06536 |
| GALNTL4          | 0.0178211  | -1.06541 |
| TMPRSS13         | 0.0272545  | -1.06541 |
| SNHG11           | 0.034745   | -1.06547 |
| THTPA            | 0.029296   | -1.0655  |
| 2300002D11RIK    | 0.0462847  | -1.06565 |
| POLRMT           | 0.0750481  | -1.06597 |
| CAB39L           | 0.00768705 | -1.06604 |
| ELL              | 0.0547469  | -1.06634 |
| ATP5F1           | 0.0656277  | -1.0664  |
| QARS             | 0.0699193  | -1.06692 |
| H6PD             | 0.00493822 | -1.06702 |
| ARD1             | 0.0169456  | -1.06706 |
| MYO18A           | 0.0475863  | -1.06736 |
| CNN2             | 0.0131633  | -1.06741 |
| SEPN1            | 0.0417144  | -1.06749 |
| IRF3             | 0.0655778  | -1.06752 |
| PSME2            | 0.00890873 | -1.06765 |
| TMEM63A          | 0.0507545  | -1.06777 |
| H2-AA            | 0.0255274  | -1.0679  |
| SH3GLB2          | 0.020907   | -1.06807 |
| SCL0002507.1_236 | 0.0268067  | -1.06831 |
| SCT              | 0.0420544  | -1.06859 |
| CCDC23           | 0.0810667  | -1.06869 |
| ZDHHC4           | 0.0198244  | -1.06883 |
| 2410018G20RIK    | 0.0108578  | -1.06889 |
| TMEM176A         | 0.0573683  | -1.06893 |
| CXCL10           | 0.00432227 | -1.06902 |
| M6PRBP1          | 0.0732857  | -1.06922 |
| TRAPPC1          | 0.00307137 | -1.06926 |
| LLGL2            | 0.0639525  | -1.06947 |
| EG216185         | 0.046652   | -1.0696  |
| TCIRG1           | 0.0444776  | -1.06965 |
| 2200001I15RIK    | 0.0783613  | -1.06988 |
| X99384           | 0.0107314  | -1.07024 |
| LOC100046003     | 0.0401694  | -1.07033 |
| LOC100046616     | 0.00438064 | -1.07051 |
| EHMT2            | 0.013645   | -1.07058 |
| CCDC53           | 0.0280921  | -1.0708  |
| HDAC7            | 0.0056479  | -1.07084 |
| OAS1G            | 0.0162609  | -1.07118 |
| LOC638301        | 0.0343348  | -1.0712  |
| FAM109A          | 0.0388103  | -1.07126 |
| MITD1            | 0.0394327  | -1.07128 |

|                 |            |          |
|-----------------|------------|----------|
| TCTEX1D2        | 0.0197298  | -1.07134 |
| TCEAL8          | 0.0128664  | -1.07145 |
| ASS1            | 0.0357133  | -1.07148 |
| MRPL22          | 0.0279349  | -1.07162 |
| LAMC2           | 0.0793793  | -1.07187 |
| LOC100047012    | 0.0212563  | -1.07203 |
| MRPS21          | 0.0393808  | -1.07204 |
| GINS4           | 0.0395752  | -1.07207 |
| PDGFRA          | 0.0430158  | -1.0722  |
| ZNRD1           | 0.0338263  | -1.07234 |
| TRIM41          | 0.0261969  | -1.07267 |
| NOD1            | 0.0377797  | -1.07276 |
| DCTN1           | 0.0409515  | -1.07289 |
| NDST2           | 0.0679163  | -1.07298 |
| PPP1R9B         | 0.0477895  | -1.07378 |
| TMEM159         | 0.0514375  | -1.07381 |
| LSM5            | 0.0186282  | -1.0741  |
| GPR153          | 0.021607   | -1.07413 |
| NDUFS3          | 0.0652508  | -1.07423 |
| ACAA2           | 0.00551335 | -1.07429 |
| 4933412E12RIK   | 0.0151382  | -1.07452 |
| BLOC1S1         | 0.0175647  | -1.07469 |
| 4931426K16RIK   | 0.0373792  | -1.07477 |
| OXA1L           | 0.0474156  | -1.07481 |
| ALDH4A1         | 0.0246502  | -1.07498 |
| ELOVL1          | 0.0274522  | -1.07531 |
| 1810013D10RIK   | 0.0797118  | -1.07536 |
| MYO9B           | 0.00710413 | -1.07551 |
| SCL0003781.1_22 | 0.0624985  | -1.07582 |
| CDK4            | 0.0687895  | -1.07613 |
| PKIA            | 0.0423574  | -1.07634 |
| CLTA            | 0.0332571  | -1.07636 |
| PRSS8           | 0.0810448  | -1.07639 |
| SLC9A3R1        | 0.0127529  | -1.07646 |
| RHOC            | 0.0280767  | -1.07647 |
| RPL30           | 0.0308149  | -1.0765  |
| DGKA            | 0.00317419 | -1.07652 |
| SUMO3           | 0.064907   | -1.07677 |
| B230369L08RIK   | 0.0804353  | -1.07686 |
| TRIB2           | 0.026131   | -1.07699 |
| RNF5            | 0.0157665  | -1.07722 |
| GNG10           | 0.0846376  | -1.07726 |
| LOC100048556    | 0.0394255  | -1.0775  |
| TNIK            | 0.0526439  | -1.0777  |
| AI607873        | 0.0183461  | -1.07799 |
| 2310075M15RIK   | 0.00759753 | -1.07807 |
| HR              | 0.0458865  | -1.07848 |
| CXXC1           | 0.0151767  | -1.07851 |
| PIGP            | 0.0551299  | -1.07864 |
| ADSS            | 0.0201747  | -1.07907 |
| KLHL17          | 0.0221329  | -1.07921 |
| ARL3            | 0.00309371 | -1.07922 |
| CD200           | 0.0072231  | -1.07935 |
| HECA            | 0.0569194  | -1.07941 |
| 4933421H10RIK   | 0.021764   | -1.07989 |
| SCL000292.1_12  | 0.0130451  | -1.07993 |
| SSNA1           | 0.0130108  | -1.0802  |
| POF1B           | 0.0276709  | -1.08043 |

|                    |            |          |
|--------------------|------------|----------|
| 150010J02RIK       | 0.0239847  | -1.08049 |
| SUCLG1             | 0.0162565  | -1.08051 |
| TMEM88             | 0.00240006 | -1.0806  |
| LOC100046744       | 0.0467128  | -1.08087 |
| TMC4               | 0.0163646  | -1.08099 |
| SORT1              | 0.0423751  | -1.08122 |
| ACVR2B             | 0.0591038  | -1.08125 |
| APOA1BP            | 0.0393521  | -1.08128 |
| ZFP68              | 0.0170758  | -1.08143 |
| DLG3               | 0.0666692  | -1.08158 |
| MOCOS              | 0.0534107  | -1.08163 |
| 2310005E10RIK      | 0.0381636  | -1.08164 |
| DHRS1              | 0.0605554  | -1.08174 |
| CIB1               | 0.0436549  | -1.08179 |
| B230333E16RIK      | 0.0210666  | -1.08186 |
| OCIAD1             | 0.0840389  | -1.08193 |
| SUPT3H             | 0.0780429  | -1.08216 |
| ANKMY2             | 0.0127556  | -1.08221 |
| HNRNPK             | 0.0288973  | -1.08225 |
| LOC100047963       | 0.0795175  | -1.08243 |
| PIK3IP1            | 0.0454248  | -1.08361 |
| NACC2              | 0.0576753  | -1.08371 |
| TMC6               | 0.0158462  | -1.08462 |
| AI646023           | 0.0536506  | -1.08473 |
| OTTMUSG00000007855 | 0.0363239  | -1.08477 |
| EPDR1              | 0.0737755  | -1.08496 |
| CAPG               | 0.00626621 | -1.08511 |
| HSBP1              | 0.0358119  | -1.08524 |
| TAF10              | 0.0740144  | -1.08527 |
| RPL13A             | 0.00365542 | -1.0853  |
| LOC627985          | 0.0707973  | -1.08546 |
| LAMA5              | 0.0619706  | -1.08558 |
| 2010107H07RIK      | 0.00663274 | -1.08559 |
| BAT5               | 0.027551   | -1.08594 |
| DGKZ               | 0.0658055  | -1.08619 |
| TDRD7              | 0.043154   | -1.08638 |
| AES                | 0.0391354  | -1.08653 |
| GALT               | 0.00951232 | -1.08655 |
| IRF7               | 0.0134091  | -1.08687 |
| 5133401N09RIK      | 0.00485707 | -1.08696 |
| PLXNB2             | 0.0176033  | -1.08708 |
| CUTA               | 0.0360273  | -1.08736 |
| PRKAB1             | 0.0408235  | -1.08736 |
| SLC9A1             | 0.0360484  | -1.08738 |
| MGC18837           | 0.0304734  | -1.08772 |
| MED24              | 0.040117   | -1.08774 |
| LOC244710          | 0.0579216  | -1.08813 |
| 1810006K21RIK      | 0.0389388  | -1.08828 |
| ARHGEF19           | 0.00294254 | -1.08829 |
| PRKRA              | 0.0375641  | -1.08834 |
| ITGB1BP1           | 0.0302872  | -1.08843 |
| COMMD4             | 0.0617669  | -1.08859 |
| CXCL12             | 0.0465719  | -1.08915 |
| LOC100047936       | 0.0314133  | -1.08962 |
| NRM                | 0.0322571  | -1.08965 |
| DAB2IP             | 0.0787798  | -1.08983 |
| SCP2               | 0.0128581  | -1.08993 |
| S100A14            | 0.0463312  | -1.08993 |

|               |             |          |
|---------------|-------------|----------|
| MAP3K11       | 0.0833685   | -1.08993 |
| CTSC          | 0.0503492   | -1.0903  |
| STARD10       | 0.0378592   | -1.09132 |
| NME3          | 0.0114289   | -1.09169 |
| NHSL1         | 0.0141328   | -1.09222 |
| 3110001D03RIK | 0.0156157   | -1.09229 |
| ZNF512B       | 0.0154477   | -1.09242 |
| LUM           | 0.0300677   | -1.09264 |
| PARP12        | 0.00932992  | -1.09266 |
| MRPL30        | 0.0108544   | -1.09281 |
| 2610027C15RIK | 0.0772469   | -1.09281 |
| TLE6          | 0.026212    | -1.09298 |
| MUM1          | 0.0761772   | -1.093   |
| AGPS          | 0.0316137   | -1.09351 |
| PSKH1         | 0.045512    | -1.09378 |
| E130102H24RIK | 0.00672209  | -1.09383 |
| LAPTM5        | 0.0846348   | -1.09393 |
| LOC100046918  | 0.0750436   | -1.09403 |
| IFT81         | 0.0764268   | -1.09415 |
| JUN           | 0.0642187   | -1.0945  |
| NUDT16L1      | 0.046831    | -1.09455 |
| TSPAN3        | 0.0573333   | -1.09465 |
| EI24          | 0.0556403   | -1.09523 |
| TSC2          | 0.0128503   | -1.09528 |
| C4B           | 0.0733341   | -1.09532 |
| D10ERTD322E   | 0.0327553   | -1.0955  |
| RFC2          | 0.0190047   | -1.09556 |
| CBR1          | 0.00592977  | -1.09576 |
| HMGCS2        | 0.00539633  | -1.09592 |
| TSEN34        | 0.0500029   | -1.09623 |
| MIC2L1        | 0.0363868   | -1.09633 |
| 1300013J15RIK | 0.0234557   | -1.09639 |
| VWA5A         | 0.00575345  | -1.09653 |
| YWHAH         | 0.0419067   | -1.0966  |
| KREMEN        | 0.0266888   | -1.09692 |
| 9430029L20RIK | 0.0315338   | -1.09696 |
| 2700038C09RIK | 0.0353453   | -1.09699 |
| HYI           | 0.0243154   | -1.09743 |
| 2310005N03RIK | 0.0388542   | -1.09749 |
| MYADM         | 0.0102996   | -1.09786 |
| BC014795      | 0.0151355   | -1.0981  |
| RTN3          | 0.00540401  | -1.09817 |
| RELN          | 0.0230936   | -1.09845 |
| HIST2H2AA2    | 0.0542362   | -1.09856 |
| SCAND1        | 0.050971    | -1.09867 |
| CARKD         | 0.0142295   | -1.09876 |
| ARF3          | 0.0096991   | -1.09907 |
| LY6D          | 0.0485405   | -1.09908 |
| 2810410M20RIK | 0.0120379   | -1.09916 |
| CORO1B        | 0.0720976   | -1.09946 |
| ETFB          | 0.0501323   | -1.09971 |
| BC002163      | 0.00148242  | -1.10001 |
| SORL1         | 0.0343138   | -1.10002 |
| GNB2          | 0.0757378   | -1.10025 |
| FLYWCH2       | 0.00268458  | -1.10026 |
| AW228700      | 0.000706754 | -1.10035 |
| ANO1          | 0.0168666   | -1.10096 |
| RPL29         | 0.019956    | -1.10111 |

|               |            |          |
|---------------|------------|----------|
| MAP1LC3B      | 0.0138979  | -1.10132 |
| H2-Q7         | 0.0146179  | -1.10136 |
| MAPK13        | 0.0617044  | -1.10158 |
| GLO1          | 0.081716   | -1.10222 |
| FOXA3         | 0.0659524  | -1.10264 |
| GNAI2         | 0.0669723  | -1.10286 |
| FBXW17        | 0.0179358  | -1.10405 |
| EG629383      | 0.0209187  | -1.10405 |
| LOC226017     | 0.00511418 | -1.10433 |
| AP3D1         | 0.0231829  | -1.10468 |
| FKBP8         | 0.0484059  | -1.10584 |
| DPP7          | 0.00484009 | -1.10596 |
| INMT          | 0.0547995  | -1.10625 |
| LY6C1         | 0.0377136  | -1.10679 |
| AQP9          | 0.0225693  | -1.1068  |
| CTNNAL1       | 0.00877335 | -1.10739 |
| ST6GAL1       | 0.0718835  | -1.10754 |
| 1810035L17RIK | 0.00224615 | -1.10825 |
| HNRNPH1       | 0.049243   | -1.10866 |
| NAT5          | 0.0116483  | -1.10875 |
| ACPP          | 0.0207487  | -1.10904 |
| COL6A1        | 0.0661426  | -1.10937 |
| D10ERTD610E   | 0.0106417  | -1.10964 |
| DGAT2         | 0.0607384  | -1.10973 |
| LRP4          | 0.0516264  | -1.10989 |
| RNASEK        | 0.0527943  | -1.11004 |
| FLOT2         | 0.0550118  | -1.11005 |
| 5930412G12RIK | 0.0408876  | -1.11051 |
| BC039093      | 0.0508915  | -1.11057 |
| CD74          | 0.0681813  | -1.11064 |
| RGL2          | 0.0430807  | -1.1109  |
| EG632248      | 0.0848427  | -1.11109 |
| PARP14        | 0.0242203  | -1.11121 |
| S100A13       | 0.0170262  | -1.11125 |
| 2210015K02RIK | 0.00589538 | -1.11131 |
| OGFR          | 0.0528917  | -1.11145 |
| ETV4          | 0.00743857 | -1.11197 |
| RPP21         | 0.0566298  | -1.11225 |
| FBLN1         | 0.0330563  | -1.11248 |
| H2AFV         | 0.0168765  | -1.11273 |
| SEPW1         | 0.00106566 | -1.1129  |
| SAMD14        | 0.00135816 | -1.11298 |
| NDUFB3        | 0.0375529  | -1.11309 |
| A230057M07RIK | 0.0181594  | -1.11341 |
| GPX8          | 0.00279338 | -1.11352 |
| HIST1H2AK     | 0.0777448  | -1.1139  |
| FCF1          | 0.00127015 | -1.11401 |
| ULK1          | 0.0230928  | -1.11408 |
| AP2S1         | 0.050924   | -1.11471 |
| PSMB9         | 0.0382117  | -1.11492 |
| FIS1          | 0.0219693  | -1.11499 |
| MOCS1         | 0.00179447 | -1.1151  |
| EPS8L2        | 0.0256031  | -1.11572 |
| D14ERTD668E   | 0.00860515 | -1.11606 |
| EG384525      | 0.0833196  | -1.11624 |
| LAMB2         | 0.0276035  | -1.11665 |
| CCDC56        | 0.0254346  | -1.11742 |
| DNAJC7        | 0.0662377  | -1.11788 |



|               |            |          |
|---------------|------------|----------|
| NDUFA9        | 0.0820708  | -1.118   |
| MGST3         | 0.0475331  | -1.11801 |
| LOC100039786  | 0.0521249  | -1.11803 |
| NPR2          | 0.0490031  | -1.11808 |
| 0610031J06RIK | 0.0110242  | -1.11826 |
| SUPT4H1       | 0.0754108  | -1.11856 |
| A230050P20RIK | 0.0278594  | -1.11869 |
| TMED4         | 0.0118589  | -1.119   |
| 2310016C16RIK | 0.00112863 | -1.11905 |
| KTELC1        | 0.0754688  | -1.11932 |
| HBB-B1        | 0.0782909  | -1.11934 |
| LOC100048554  | 0.00613143 | -1.11936 |
| LOC280205     | 0.0518419  | -1.11972 |
| NIPSNAP1      | 0.00444099 | -1.11977 |
| 9530064J02    | 0.0119146  | -1.12009 |
| SKAP2         | 0.00532268 | -1.12035 |
| IRF1          | 0.0496625  | -1.12065 |
| LOC100046802  | 0.0587386  | -1.12088 |
| EFHA1         | 0.0542349  | -1.12128 |
| GFPT2         | 0.00961725 | -1.12238 |
| LOC100047173  | 0.0530092  | -1.12244 |
| TMEM43        | 0.0187514  | -1.1229  |
| CUEDC2        | 0.0279883  | -1.12327 |
| 2700084L06RIK | 0.04373    | -1.12353 |
| MIB2          | 0.0399431  | -1.12362 |
| IRF9          | 0.00279905 | -1.12391 |
| IGTP          | 5.80E-05   | -1.12412 |
| UBE1L         | 0.0474797  | -1.12488 |
| GNB1          | 0.0429307  | -1.1251  |
| LOC381302     | 0.0195186  | -1.12535 |
| GLRX1         | 0.0161024  | -1.12562 |
| VCAM1         | 0.0510336  | -1.12644 |
| RAB25         | 0.0383405  | -1.12696 |
| RARRES2       | 0.0306901  | -1.12698 |
| NDUFC1        | 0.0291092  | -1.12778 |
| NDUFS4        | 0.0017403  | -1.12835 |
| ERGIC3        | 0.032527   | -1.13    |
| EPB4.1L4B     | 0.00791352 | -1.13041 |
| PTK7          | 0.0265933  | -1.13084 |
| MAPKAPK2      | 0.0164987  | -1.13086 |
| DLG5          | 0.0367576  | -1.13094 |
| LOC672474     | 0.00371065 | -1.1314  |
| EG667977      | 0.064345   | -1.1315  |
| CXCR4         | 0.0573391  | -1.13152 |
| FURIN         | 0.0623403  | -1.13215 |
| TRAFD1        | 0.0233355  | -1.13221 |
| SNRPG         | 0.0587917  | -1.1326  |
| TXNDC15       | 0.0699422  | -1.13264 |
| ABHD4         | 0.0136964  | -1.13266 |
| DTX3L         | 0.0549694  | -1.13268 |
| GLRX          | 0.00568145 | -1.13335 |
| GSTM2         | 0.00623464 | -1.13351 |
| IPO13         | 0.00394008 | -1.13442 |
| CAPZB         | 0.00648403 | -1.13458 |
| SLC4A2        | 0.0479205  | -1.1351  |
| MRPL28        | 0.0778511  | -1.13562 |
| COMMD3        | 0.0663292  | -1.13572 |
| MRPL23        | 0.00653314 | -1.13597 |

|               |             |          |
|---------------|-------------|----------|
| ATP5G2        | 0.00124033  | -1.13688 |
| BCAS3         | 0.00289342  | -1.13688 |
| NPAL2         | 0.0193832   | -1.13716 |
| TMEM14C       | 0.0836365   | -1.13797 |
| TMEM205       | 0.0096554   | -1.13813 |
| CHIC2         | 0.0131036   | -1.13843 |
| LOC547343     | 0.00197303  | -1.1386  |
| NFIX          | 0.00253046  | -1.13957 |
| NDUFS8        | 0.0327416   | -1.13964 |
| IIGP2         | 0.0068677   | -1.14126 |
| TMEM208       | 0.0087328   | -1.14152 |
| LOC100044395  | 0.0659433   | -1.14188 |
| FAM20A        | 0.0316479   | -1.14207 |
| ITPKC         | 0.0626808   | -1.14238 |
| TRAPPC2L      | 0.0270889   | -1.14269 |
| SPPL3         | 0.0207286   | -1.14321 |
| LOC381398     | 0.0608975   | -1.14334 |
| MARCKSL1      | 0.0134686   | -1.14364 |
| INPP5K        | 0.00322714  | -1.1446  |
| 2310016M24RIK | 0.0460641   | -1.14575 |
| SDF2          | 0.0221997   | -1.14605 |
| PLEKHG2       | 0.0596689   | -1.14627 |
| B4GALNT1      | 0.0120861   | -1.14661 |
| SDC3          | 0.0736286   | -1.14666 |
| GSTT3         | 0.0226063   | -1.14689 |
| PPP2R1A       | 0.0758439   | -1.14815 |
| NENF          | 0.0158122   | -1.14845 |
| LAMP2         | 0.0234253   | -1.14857 |
| CALCA         | 0.080934    | -1.14979 |
| SBK           | 0.00313968  | -1.15063 |
| CUL7          | 0.0297652   | -1.15072 |
| GRCC10        | 0.0109145   | -1.15142 |
| PHLDA3        | 0.0301583   | -1.15183 |
| SCOTIN        | 0.0186678   | -1.15257 |
| PHPT1         | 0.0418963   | -1.15263 |
| LTBP3         | 0.0402988   | -1.15293 |
| LYZ           | 0.064394    | -1.15296 |
| RALBP1        | 0.0336346   | -1.15417 |
| ADAMTS4       | 0.0337392   | -1.15426 |
| RNPEP         | 0.0360706   | -1.15435 |
| 5033414D02RIK | 0.000932641 | -1.15443 |
| PER1          | 0.050395    | -1.15451 |
| 5330430P07RIK | 0.0806852   | -1.15455 |
| SAV1          | 0.0841323   | -1.15491 |
| NDUFC2        | 0.0401992   | -1.15585 |
| VKORC1        | 0.00901795  | -1.1559  |
| DPY30         | 0.00405034  | -1.15606 |
| LOC380707     | 0.0652185   | -1.15641 |
| GYLTL1B       | 0.0471688   | -1.15723 |
| LOC100045981  | 0.02386     | -1.15809 |
| D930038J03RIK | 0.00200438  | -1.15839 |
| SH3YL1        | 0.0825183   | -1.15839 |
| GSTM1         | 0.0846829   | -1.15906 |
| RAB11B        | 0.01635     | -1.15943 |
| CASP2         | 0.0144866   | -1.16139 |
| SNX10         | 0.00468061  | -1.1615  |
| 2310009A05RIK | 0.0406381   | -1.16204 |
| SH3PXD2B      | 0.039909    | -1.16263 |

|               |            |          |
|---------------|------------|----------|
| MRPL53        | 0.00478526 | -1.16278 |
| TRIM32        | 0.019337   | -1.16331 |
| SUV420H2      | 0.0172395  | -1.16435 |
| LOC623453     | 0.0380216  | -1.16487 |
| LOC383330     | 0.0480022  | -1.16516 |
| CCDC85B       | 0.06984    | -1.16745 |
| JUNB          | 0.0235439  | -1.16752 |
| AKR7A5        | 0.00485796 | -1.16769 |
| ITFG3         | 0.00413126 | -1.16821 |
| RAB3D         | 0.0302288  | -1.16879 |
| ANTXR1        | 0.0434699  | -1.16882 |
| CISH          | 0.0638777  | -1.16887 |
| SH3BGRL3      | 0.0661514  | -1.16972 |
| PRCP          | 0.0270754  | -1.17014 |
| RIN2          | 0.0421701  | -1.17064 |
| AK3           | 0.0322994  | -1.17065 |
| 5730437N04RIK | 0.00878142 | -1.17086 |
| EG665509      | 0.0144518  | -1.17111 |
| FBLIM1        | 0.0440413  | -1.17132 |
| CENPB         | 0.0800408  | -1.1724  |
| SERINC2       | 0.0345528  | -1.17301 |
| LOC331102     | 0.0490741  | -1.17306 |
| ZFP532        | 0.0540821  | -1.17397 |
| TIAM1         | 0.0527706  | -1.17478 |
| TPRGL         | 0.0273188  | -1.17526 |
| PPIC          | 0.04003    | -1.17575 |
| NLGN2         | 0.00637749 | -1.17604 |
| LOC100046056  | 0.0334265  | -1.17649 |
| CYBA          | 0.00126781 | -1.17689 |
| LOC382061     | 0.0473301  | -1.17714 |
| PPP1CA        | 0.0475253  | -1.17759 |
| EBPL          | 0.0673097  | -1.17783 |
| HNRPA1        | 0.0174285  | -1.17844 |
| BCKDHA        | 0.00501361 | -1.17845 |
| MRPS33        | 0.0677484  | -1.18057 |
| EFEMP2        | 4.58E-05   | -1.18156 |
| FSTL1         | 0.00625107 | -1.18158 |
| CCL11         | 0.0113542  | -1.18187 |
| C330002I19RIK | 0.0367537  | -1.18224 |
| STAC2         | 0.0834707  | -1.18231 |
| FBXO6         | 0.0254639  | -1.18401 |
| CCL2          | 0.0198386  | -1.1861  |
| LOC668387     | 0.065675   | -1.18618 |
| MRPL36        | 0.0742614  | -1.18635 |
| 1190017O12RIK | 0.0503512  | -1.1871  |
| VAMP8         | 0.0285137  | -1.18821 |
| OBRGRP        | 0.00774876 | -1.19031 |
| CLK1          | 0.0671439  | -1.19154 |
| PRLR          | 0.0608918  | -1.19182 |
| LOC675440     | 0.0393034  | -1.19197 |
| TOMM7         | 0.00105916 | -1.19317 |
| 9130213B05RIK | 0.0798018  | -1.19338 |
| EIF3K         | 0.0110951  | -1.19342 |
| LOC667370     | 0.0153214  | -1.1938  |
| IGSF3         | 0.0392683  | -1.19427 |
| LOC654426     | 0.061597   | -1.19447 |
| CLIP4         | 0.0263048  | -1.1972  |
| ARF6          | 0.0383362  | -1.19924 |

|                  |             |          |
|------------------|-------------|----------|
| WFDC12           | 0.0181231   | -1.19982 |
| SCARA3           | 0.0177186   | -1.20011 |
| LOC100048346     | 0.0140855   | -1.20039 |
| ARL6IP5          | 0.0139572   | -1.20142 |
| NDUFB8           | 0.0526584   | -1.20224 |
| ANAPC13          | 0.010397    | -1.20267 |
| FOXA1            | 0.0296852   | -1.20443 |
| PLCH2            | 0.0380547   | -1.20537 |
| NSMCE1           | 0.0411841   | -1.20641 |
| H3F3A            | 0.0369099   | -1.20745 |
| BSCL2            | 0.0431943   | -1.20791 |
| HINT2            | 0.0495333   | -1.20888 |
| 0610006I08RIK    | 0.0289641   | -1.2093  |
| MCEE             | 0.013349    | -1.20974 |
| ZER1             | 0.0191015   | -1.21022 |
| 1200009O22RIK    | 0.00827766  | -1.21105 |
| DDAH2            | 0.0407902   | -1.21286 |
| GSTM5            | 0.0450117   | -1.21315 |
| MMP14            | 0.00467515  | -1.21408 |
| ABHD14B          | 0.0531098   | -1.21466 |
| PTX3             | 0.014545    | -1.21484 |
| RPL22            | 0.00316799  | -1.2151  |
| SCL0002617.1_582 | 0.0367674   | -1.21612 |
| SEPX1            | 0.00728059  | -1.21817 |
| ATP5D            | 0.0609836   | -1.2183  |
| STXBP2           | 0.0062296   | -1.21914 |
| PSMB8            | 0.00881543  | -1.21944 |
| SHFM1            | 0.0153525   | -1.21948 |
| 1110046J11RIK    | 0.0214144   | -1.22223 |
| PSMB10           | 0.00127331  | -1.22267 |
| ACOT7            | 0.0163658   | -1.22432 |
| FCGRT            | 0.00997364  | -1.22506 |
| USP18            | 0.0375372   | -1.22623 |
| TMEM9            | 0.00785682  | -1.22625 |
| CYB5             | 0.0311028   | -1.22806 |
| ACADM            | 0.0390717   | -1.23001 |
| ECHDC2           | 0.0402621   | -1.23076 |
| MRPL52           | 0.0151295   | -1.23118 |
| TIMM8B           | 0.0689283   | -1.23189 |
| CCDC120          | 0.058327    | -1.23225 |
| LOC100047353     | 0.0457047   | -1.23542 |
| AOF2             | 0.067505    | -1.23598 |
| HMG3             | 0.00652154  | -1.23746 |
| LOC100048480     | 0.000268215 | -1.2379  |
| LOC433546        | 0.0444005   | -1.23961 |
| ITGB5            | 0.0217527   | -1.24041 |
| IFI47            | 0.0621723   | -1.24208 |
| SERPINF1         | 0.0447638   | -1.24302 |
| CDC2L6           | 0.0667843   | -1.24345 |
| HIST2H2AC        | 0.0829542   | -1.24446 |
| KNSL5            | 0.0684942   | -1.24716 |
| GPSN2            | 0.0178312   | -1.24805 |
| PRKD2            | 0.0336404   | -1.24815 |
| ATP5O            | 0.0116971   | -1.24938 |
| NDUFA7           | 0.0360303   | -1.25189 |
| RNF130           | 0.0670934   | -1.25578 |
| CTDSP2           | 0.00588642  | -1.25604 |
| CYB561           | 0.0559283   | -1.25826 |

|               |             |          |
|---------------|-------------|----------|
| ATP5J         | 0.0143117   | -1.25939 |
| LOC100043796  | 0.0625544   | -1.26125 |
| LASP1         | 0.0473766   | -1.26321 |
| B230343A10RIK | 0.0249139   | -1.26372 |
| INPPL1        | 0.0276659   | -1.26374 |
| LOC100044190  | 0.00188983  | -1.26548 |
| DDR1          | 0.00834908  | -1.26558 |
| FLOT1         | 0.0540598   | -1.26597 |
| H2-K1         | 0.00746332  | -1.26723 |
| IL11RA1       | 0.006229    | -1.26793 |
| GBP3          | 0.043107    | -1.26895 |
| C4A           | 0.0636906   | -1.26949 |
| 2210013O21RIK | 0.0781221   | -1.27017 |
| TSTA3         | 0.021261    | -1.27091 |
| TEAD2         | 0.00776337  | -1.27371 |
| MYLC2B        | 0.0512171   | -1.27429 |
| SMARCD2       | 0.0335042   | -1.27431 |
| 0610007C21RIK | 0.0455853   | -1.27567 |
| TIMP2         | 0.0472278   | -1.2762  |
| FAM173A       | 0.00964752  | -1.27664 |
| MIDN          | 0.000893845 | -1.28549 |
| COL4A5        | 0.0748639   | -1.28572 |
| MRPS24        | 0.018548    | -1.28646 |
| S100A1        | 0.0323741   | -1.28665 |
| EIF2AK2       | 0.00324041  | -1.28737 |
| LOC381629     | 0.0337509   | -1.29087 |
| MRPL33        | 0.0428219   | -1.29154 |
| 2810410A03RIK | 0.0278632   | -1.29943 |
| RSAD2         | 0.0331913   | -1.29986 |
| EG626367      | 0.00228626  | -1.30767 |
| LGALS9        | 0.0612261   | -1.32206 |
| PCBP2         | 0.0293559   | -1.32225 |
| LOC100047261  | 0.0235023   | -1.33035 |
| NDUFA6        | 0.0220081   | -1.33091 |
| 1810027O10RIK | 0.00897693  | -1.33209 |
| HIST1H2AI     | 0.0834462   | -1.33244 |
| NDUFA3        | 0.0449241   | -1.33291 |
| RABAC1        | 0.0680262   | -1.33299 |
| LGMN          | 0.00747109  | -1.33334 |
| PON2          | 0.00797611  | -1.33368 |
| TAGLN2        | 0.0442164   | -1.33815 |
| COL7A1        | 0.029011    | -1.3395  |
| PTN           | 0.0537753   | -1.33954 |
| OXCT1         | 0.0472923   | -1.34007 |
| EG434858      | 0.0101027   | -1.34024 |
| 0910001L09RIK | 0.00116721  | -1.34168 |
| CAR13         | 0.0190889   | -1.34746 |
| NDFIP1        | 0.0233183   | -1.34759 |
| SUMO2         | 0.0241531   | -1.35198 |
| CMC1          | 0.0409094   | -1.35272 |
| LOC225134     | 0.0351167   | -1.35382 |
| MTDNA_ND2     | 0.0243839   | -1.35928 |
| PLAU          | 0.0589671   | -1.36366 |
| LOC654467     | 0.0160456   | -1.3649  |
| TAP2          | 0.0576183   | -1.365   |
| TSC22D1       | 0.0260176   | -1.36563 |
| NGFRAP1       | 0.0673414   | -1.36846 |
| PRICKLE3      | 0.0162682   | -1.36862 |

|               |             |          |
|---------------|-------------|----------|
| OASL2         | 0.0461749   | -1.37466 |
| SPINT1        | 0.0660841   | -1.37568 |
| SERPING1      | 0.0353255   | -1.37837 |
| LOC668038     | 0.0483887   | -1.38041 |
| DCAKD         | 0.0109582   | -1.38065 |
| LOC225058     | 0.0188108   | -1.38294 |
| GM2A          | 0.0345292   | -1.38327 |
| PSENEEN       | 0.0387218   | -1.384   |
| GPX4          | 0.00483176  | -1.38416 |
| ST5           | 0.0325158   | -1.39379 |
| LOC100038882  | 0.0776974   | -1.39642 |
| AXUD1         | 0.0645014   | -1.40396 |
| DCN           | 0.0342003   | -1.40499 |
| PRDX2         | 0.0182122   | -1.40545 |
| AQP5          | 0.00636805  | -1.40842 |
| PFN1          | 0.0439231   | -1.41145 |
| TAX1BP3       | 0.00169694  | -1.41448 |
| RRAS          | 0.0472675   | -1.41476 |
| MARCKS        | 0.0176637   | -1.41551 |
| ECH1          | 0.0276857   | -1.4164  |
| FAM115C       | 0.0483145   | -1.41672 |
| SAMD9L        | 0.0152371   | -1.42435 |
| UROD          | 0.0347168   | -1.425   |
| CCL7          | 0.0147045   | -1.4348  |
| ATP6V0E       | 0.0121068   | -1.44387 |
| TSPAN14       | 0.0576748   | -1.4447  |
| EG637748      | 0.0636178   | -1.44605 |
| TCEB2         | 0.0837233   | -1.44688 |
| MIA1          | 0.00601607  | -1.4469  |
| COX6C         | 0.0482849   | -1.45012 |
| EG433229      | 0.00693763  | -1.45073 |
| CALM3         | 0.0728138   | -1.45106 |
| RPS5          | 0.0311413   | -1.45794 |
| LOC219145     | 0.00905749  | -1.46519 |
| H2-Q5         | 0.0201235   | -1.4705  |
| COL4A2        | 0.0456583   | -1.47077 |
| CAPNS1        | 0.0388305   | -1.47333 |
| LOC234987     | 0.0071998   | -1.48031 |
| 1110012O05RIK | 0.0280001   | -1.48047 |
| PHLDA1        | 0.0498439   | -1.48175 |
| TRIM29        | 0.0572838   | -1.48262 |
| RPL7A         | 0.0340699   | -1.48431 |
| FGG           | 0.00232677  | -1.48734 |
| GSTK1         | 0.0534019   | -1.4958  |
| PSME1         | 0.00114146  | -1.49673 |
| MTCH1         | 0.0306631   | -1.49798 |
| HN1           | 0.0215761   | -1.50468 |
| SSPN          | 0.0505455   | -1.50861 |
| LOC433749     | 0.000396743 | -1.50877 |
| LOC100039346  | 0.0552927   | -1.51054 |
| SOCS3         | 0.083512    | -1.51462 |
| MTDNA_ND5     | 0.00488188  | -1.52769 |
| RNPEPL1       | 0.0406538   | -1.53433 |
| EG666609      | 0.00355329  | -1.53884 |
| SPARC         | 0.0533067   | -1.54976 |
| LGALS3BP      | 0.0207588   | -1.55198 |
| LOC100048508  | 0.00615294  | -1.55201 |
| MYL9          | 0.0828757   | -1.55522 |

|               |           |             |          |
|---------------|-----------|-------------|----------|
|               | 100041294 | 0.0189152   | -1.56368 |
| PIGX          |           | 0.0399191   | -1.57031 |
| LOC383712     |           | 0.0586596   | -1.57465 |
| EG667728      |           | 0.0499133   | -1.57535 |
| LDB1          |           | 0.0170134   | -1.58321 |
| ATOX1         |           | 0.014638    | -1.58382 |
| KRTCAP3       |           | 0.00484767  | -1.59428 |
| 1110020P15RIK |           | 0.0715319   | -1.60151 |
| EG237361      |           | 0.0129798   | -1.60914 |
| LOC665250     |           | 0.0601179   | -1.6205  |
| TIMP1         |           | 0.0246485   | -1.62551 |
| NDUFA13       |           | 0.0166957   | -1.62743 |
| PSAP          |           | 0.072197    | -1.6279  |
| APOC1         |           | 0.0330317   | -1.62894 |
| S100A6        |           | 0.0812432   | -1.63097 |
| RNASE4        |           | 0.0841745   | -1.63501 |
| LOC386067     |           | 0.0567363   | -1.65199 |
| ZFP36         |           | 0.0382521   | -1.65226 |
| DYNLL1        |           | 0.0229352   | -1.66433 |
| TSPO          |           | 0.0037096   | -1.68162 |
| LOC624662     |           | 0.0155131   | -1.68561 |
| IFIT3         |           | 0.0198449   | -1.6904  |
| CASP1         |           | 0.0829533   | -1.69887 |
| GRN           |           | 0.000353254 | -1.70265 |
| MYEOV2        |           | 0.00770659  | -1.70375 |
| ATP5J2        |           | 0.057218    | -1.72347 |
| COL9A2        |           | 0.0262752   | -1.72387 |
| RPS13         |           | 0.0108973   | -1.73005 |
| 0610010I05RIK |           | 0.00995472  | -1.73384 |
| BAG3          |           | 0.0337712   | -1.73756 |
| PLEKHB1       |           | 0.0845155   | -1.73871 |
| RNF213        |           | 0.0305429   | -1.75166 |
| LOC100045312  |           | 0.00129705  | -1.76173 |
| GAS6          |           | 0.0624218   | -1.77857 |
| EG620119      |           | 0.0322686   | -1.78283 |
| RPL27A        |           | 0.0300022   | -1.7907  |
| MMP3          |           | 0.0265405   | -1.80737 |
| EG269105      |           | 0.0602691   | -1.81525 |
| EG668850      |           | 0.0337526   | -1.85327 |
| LOC100044475  |           | 0.0128254   | -1.86092 |
| LOC100048613  |           | 0.0460621   | -1.87333 |
| COX6B1        |           | 0.0658161   | -1.87602 |
| D12ERTD647E   |           | 0.0299185   | -1.88051 |
| RPL10A        |           | 0.0654611   | -1.90091 |
| ANGPTL4       |           | 0.0648228   | -1.91847 |
| CLEC2D        |           | 0.0379417   | -1.93778 |
| LOC100045005  |           | 0.00196382  | -1.94889 |
| CST3          |           | 0.00130249  | -1.95805 |
| LOC237512     |           | 0.0591774   | -1.96464 |
| LOC433476     |           | 0.00470297  | -1.98832 |
| HIGD2A        |           | 0.0607301   | -1.99145 |
| LOC674135     |           | 0.000364794 | -2.01049 |
| CTSB          |           | 0.0290082   | -2.04768 |
| LOC381283     |           | 0.0415287   | -2.0546  |
| ITM2B         |           | 0.0327632   | -2.05836 |
| 2010107E04RIK |           | 0.00546093  | -2.08265 |
| VPS28         |           | 0.0725108   | -2.18414 |
| RPS19         |           | 0.0397315   | -2.21839 |

|              |             |          |
|--------------|-------------|----------|
| PDLIM4       | 0.0144563   | -2.22723 |
| RPL18        | 0.0270854   | -2.22809 |
| APOE         | 0.066748    | -2.24312 |
| SPON2        | 0.0132116   | -2.24932 |
| EG630499     | 0.0151032   | -2.26741 |
| PFDN5        | 0.0103387   | -2.32661 |
| LOC635470    | 0.0455297   | -2.33451 |
| C3           | 0.023809    | -2.33602 |
| LGALS7       | 0.0259242   | -2.36141 |
| CRIP2        | 0.0316501   | -2.36397 |
| H2-T23       | 0.0122109   | -2.36504 |
| SCD1         | 0.038903    | -2.41067 |
| RPL31        | 0.0428006   | -2.42236 |
| LOC665032    | 0.0103116   | -2.46543 |
| H2-D1        | 0.00415143  | -2.47236 |
| ITGB4        | 0.0261876   | -2.4749  |
| IFITM1       | 0.0842733   | -2.55243 |
| LOC238836    | 0.0300136   | -2.55943 |
| LOC241621    | 0.00565573  | -2.62223 |
| TBCA         | 0.0660328   | -2.65695 |
| ATPIF1       | 0.0499801   | -2.66791 |
| GPX1         | 0.00374564  | -2.69731 |
| RPL24        | 0.000415249 | -2.7076  |
| PDLIM3       | 0.0347059   | -2.71978 |
| COX4I1       | 0.0265473   | -2.74614 |
| LOC270037    | 0.0299004   | -2.7748  |
| IFI27        | 0.0227096   | -2.83048 |
| LOC433745    | 0.00331762  | -2.84877 |
| LOC100048187 | 0.0129402   | -2.92384 |
| RPS10        | 0.00177301  | -2.93887 |
| MMP2         | 0.0388902   | -3.04815 |
| MGP          | 0.0130788   | -3.14252 |
| LOC100043192 | 0.025485    | -3.16167 |
| LOC546015    | 0.0488696   | -3.29373 |
| LOC100048037 | 0.0256761   | -3.34347 |
| RPS15        | 0.0135807   | -3.42544 |
| RBP1         | 0.0156459   | -3.43482 |
| MYLK         | 0.0734257   | -3.49748 |
| LOC668573    | 0.0443162   | -3.50959 |
| LOC100041864 | 0.067768    | -3.55743 |
| LOC100047615 | 0.00607289  | -3.58906 |
| EG666577     | 0.0409299   | -3.67377 |
| EG268795     | 0.0044941   | -3.84391 |
| EG432721     | 0.00280287  | -3.84829 |
| LOC100043209 | 0.0182627   | -4.3151  |
| RPL26        | 0.0209261   | -4.31568 |
| LOC272681    | 0.00487239  | -4.34074 |
| TMEM176B     | 0.0517817   | -4.41236 |
| RPS9         | 0.0067595   | -4.41978 |
| UQCRH        | 0.0130412   | -4.42582 |
| LY6E         | 0.0257215   | -4.76094 |
| LOC382885    | 0.01698     | -5.70528 |
| B2M          | 0.0149109   | -5.92886 |
| LOC623568    | 0.0841065   | -6.22119 |
| RPL18A       | 0.0470338   | -6.25387 |
| LOC381999    | 0.0619129   | -6.49551 |
| FXVD3        | 0.0545115   | -7.10046 |
| RPL35        | 0.0331646   | -7.41324 |



|              |            |          |
|--------------|------------|----------|
| RPL27        | 0.0273655  | -8.09888 |
| COL16A1      | 0.0359733  | -8.26647 |
| AGRN         | 0.0682321  | -9.2063  |
| S100A11      | 0.0114578  | -9.48566 |
| LY6A         | 0.0240223  | -9.77615 |
| LOC100047998 | 0.0187009  | -9.97774 |
| EG626175     | 0.028917   | -10.0387 |
| TRF          | 0.0616034  | -12.3116 |
| RPS7         | 0.0555259  | -13.662  |
| EG432681     | 0.0590724  | -14.7484 |
| RPS21        | 0.00932409 | -16.7402 |
| MYL6         | 0.0268189  | -17.2723 |
| IFITM3       | 0.0157297  | -39.5663 |

| Supplementary Table 2. List of genotyping primers. |                              |                     |
|----------------------------------------------------|------------------------------|---------------------|
| Long range PCR primers                             | Primer sequence (5' – 3')    | Size (bp)           |
| Bcl11a-5'-Fwd                                      | GAGACAAGAACAGGTGCAAGAGTGGATT | 6,435               |
| Bcl11a-5'-Rev                                      | CAAGGAAACCCTGGACTACTGCGCCCTA |                     |
| Bcl11a-3'-Fwd                                      | GAAAGAACCAGCTGGGGCTCGACTAGAG | 3,446               |
| Bcl11a-3'-Rev                                      | CAGCGAGGTCCCCTTTCTCACTAAAAAT |                     |
| Genotyping PCR primers                             | Primer sequence (5' – 3')    | Size (bp)           |
| Bcl11a-lacZ-Fwd                                    | GCTTGCTTTGGAATATGAATGTTTG    |                     |
| Bcl11a-lacZ-Rev1                                   | CATATATGGGGTTTATGGAGTAACC    | 363 (Wt); 437 (Mut) |
| Bcl11a-lacZ-Rev2                                   | CAAGGAAACCCTGGACTACTGCGCCCTA |                     |
| Bcl11a-cko-Fwd                                     | TAGCTCCTGCTAGCCAGGTTTCTT     | 377 (Wt);           |
| Bcl11a-cko-Rev                                     | CGAGGCTTGCAGAAACAGAAAGAT     | 470 (Cko)           |
| Bcl11a-cko-Del                                     | CTCGAAGGGAGGTTTCGGTATTGTG    | 700 (Del)           |
| Rosa26-ERT-Cre-Fwd                                 | TGTGGACAGAGGAGCCATAAC        |                     |
| Rosa26-ERT-Cre-Rev1                                | CATCACTCGTTGCATCGACC         | 500 (Wt); 300 (Mut) |
| Rosa26-ERT-Cre-Rev2                                | AAGACCCAACCAACAGCAG          |                     |
| p53 exon10 Del- Rev                                | GAAGACAGAAAAGGGGAGGG         | 600 when deleted    |
| p53 exon1 cko-Fwd                                  | CACAAAACAGGTTAAACCCAG        | 300 (Wt); 400 (cko) |
| p53 exon1 cko-Rev                                  | AGCACATAGGAGGCAGAGAC         |                     |

| Supplementary Table2. List of primers used for qRT-PCR analysis. |                         |
|------------------------------------------------------------------|-------------------------|
| RT-PCR primers                                                   | Primer Sequence (5'-3') |
| Bcl11a-Fwd                                                       | TGGTATCCCTTCAGGACTAGGT  |
| Bcl11a-Rev                                                       | TCCAAGTGATGTCTCGGTGGT   |
| Cyclophilin A-Fwd                                                | CCTTGGGCCGCGTCTCCTT     |
| Cyclophilin A-Rev                                                | CACCCTGGCACATGAATGGTG   |
